# Supplementary material for: Weighted Gene Correlation Network Analysis (WGCNA) of Arabidopsis Somatic Embryogenesis (SE) and Identification of Key Gene Modules to Uncover SE-Associated Hub Genes
Source: Hindawi journal article supplement (doi:10.1155/2022/7471063), 2022-07-04
Supplement: f3 [file 7471063.f3.pdf]

Table S3. The top 10 hub genes of each network module

| Module | Gene identifier | Gene symbol                                                               | Gene description                                                                                                                                                                                                                                       | Gene type      | TF family | Differentially expressed | Embryo defective |
|--------|-----------------|---------------------------------------------------------------------------|--------------------------------------------------------------------------------------------------------------------------------------------------------------------------------------------------------------------------------------------------------|----------------|-----------|--------------------------|------------------|
| Black  | AT1G04920       | <i>SUCROSE PHOSPHATE SYNTHASE 3F (SPS3F)</i>                              | Encodes a sucrose-phosphate synthase whose activity is stimulated by Glc-6-P and inhibited by Pi                                                                                                                                                       | protein_coding | -         |                          |                  |
| Black  | AT1G62710       | <i>BETA VACUOLAR PROCESSING ENZYME (BETA-VPE)</i>                         | Encodes a vacuolar processing enzyme belonging to a novel group of cysteine proteases that is expressed specifically in seeds and is essential for the proper processing of storage proteins                                                           | protein_coding | -         |                          |                  |
| Black  | AT2G21820       | <i>AT2G21820</i>                                                          | seed maturation protein                                                                                                                                                                                                                                | protein_coding | -         |                          |                  |
| Black  | AT2G33520       | <i>CYSTEINE-RICH TRANSMEMBRANE MODULE 7 (ATHCYSTM7)</i>                   | cysteine-rich/transmembrane domain protein A                                                                                                                                                                                                           | protein_coding | -         |                          |                  |
| Black  | AT2G38900       | <i>AT2G38900</i>                                                          | Predicted to encode a pathogenesis-related peptide that belongs to the PR-6 proteinase inhibitor family                                                                                                                                                | protein_coding | -         |                          |                  |
| Black  | AT2G45510       | <i>CYTOCHROME P450, FAMILY 704, SUBFAMILY A, POLYPEPTIDE 2 (CYP704A2)</i> | member of CYP704A                                                                                                                                                                                                                                      | protein_coding | -         |                          |                  |
| Black  | AT2G45600       | <i>AT2G45600</i>                                                          | alpha/beta-Hydrolases superfamily protein                                                                                                                                                                                                              | protein_coding | -         |                          |                  |
| Black  | AT4G31670       | <i>UBIQUITIN-SPECIFIC PROTEASE 18 (UBP18)</i>                             | ubiquitin-specific protease 18                                                                                                                                                                                                                         | protein_coding | -         |                          |                  |
| Black  | AT5G16010       | <i>AT5G16010</i>                                                          | 3-oxo-5-alpha-steroid 4-dehydrogenase family protein                                                                                                                                                                                                   | protein_coding | -         |                          |                  |
| Black  | AT5G43770       | <i>AT5G43770</i>                                                          | proline-rich family protein                                                                                                                                                                                                                            | protein_coding | -         |                          |                  |
| Blue   | AT1G03900       | <i>ATP-BINDING CASSETTE 118 (ABC118)</i>                                  | member of NAP family, an heterogeneous subfamily of the ATP-binding Cassette (ABC) superfamily of membrane transporters                                                                                                                                | protein_coding | -         |                          |                  |
| Blue   | AT1G51600       | <i>ZIM-LIKE 2 (ZML2)</i>                                                  | member of a novel family of plant-specific GATA-type transcription factors.                                                                                                                                                                            | protein_coding | C2C2-Gata |                          |                  |
| Blue   | AT1G77220       | <i>LAZ1 HOMOLOG1 (LAZ1H1)</i>                                             | LAZ1H1 is a DUF300 that is localized to the tonoplast; along with LAZ1 it appears to play a role in maintaining the structural integrity of vacuoles and regulating BR signaling by modulating downstream subcellular distribution of BAK              | protein_coding | -         |                          |                  |
| Blue   | AT2G15240       | <i>AT2G15240</i>                                                          | UNC-50 family protein                                                                                                                                                                                                                                  | protein_coding | -         |                          |                  |
| Blue   | AT4G10760       | <i>MRNAADENOSINE METHYLASE (MTA)</i>                                      | Encodes a member of a core set of mRNA m6A writer proteins and is required for N6-adenosine methylation of mRNA.                                                                                                                                       | protein_coding | -         |                          | ✓                |
| Blue   | AT5G05520       | <i>AT5G05520</i>                                                          | Outer membrane OMP85 family protein                                                                                                                                                                                                                    | protein_coding | -         |                          |                  |
| Blue   | AT5G50000       | <i>CONVERGENCE OF BLUE LIGHT AND CO2 2 (CBC2)</i>                         | Belongs to the Raf-like kinase subfamily of the mitogen-activated protein kinase kinase (MAPKKK) family; negatively regulates stomatal opening by negatively regulating plasma membrane H <sup>+</sup> -ATPase phosphorylation                         | protein_coding | -         |                          |                  |
| Blue   | AT5G52820       | <i>NOTCHLESS (NLE)</i>                                                    | Encodes a NOTCHLESS homolog, a non-ribosomal protein involved in the maturation and assembly of the 60S ribosomal subunit, that is required for female gametogenesis                                                                                   | protein_coding | -         |                          |                  |
| Blue   | AT5G63400       | <i>ADENYLATE KINASE 1 (ADK1)</i>                                          | encodes a protein similar to adenylate kinase                                                                                                                                                                                                          | protein_coding | -         |                          |                  |
| Blue   | AT5G65860       | <i>AT5G65860</i>                                                          | ankyrin repeat family protein                                                                                                                                                                                                                          | protein_coding | -         | ✓                        |                  |
| Brown  | AT1G57990       | <i>PURINE PERMEASE 18 (PUP18)</i>                                         | Member of a family of proteins related to PUP1, a purine transporter. May be involved in the transport of purine and purine derivatives such as cytokinins, across the plasma membrane.                                                                | protein_coding | -         | ✓                        |                  |
| Brown  | AT2G24970       | <i>AT2G24970</i>                                                          | spindle/kinetochore-associated protein                                                                                                                                                                                                                 | protein_coding | -         |                          |                  |
| Brown  | AT3G14060       | <i>AT3G14060</i>                                                          | hypothetical protein                                                                                                                                                                                                                                   | protein_coding | -         | ✓                        |                  |
| Brown  | AT3G53180       | <i>NODULIN/GLUTAMINE SYNTHASE-LIKE PROTEIN (NodGS)</i>                    | Encodes a protein that is the product of a fusion gene with a C-terminal GSI like sequence and an N-terminal part sharing homology with nodulins. It self-assembles into oligomers and its expression is increased in response to flagellin treatment. | protein_coding | -         | ✓                        |                  |
| Brown  | AT3G56980       | <i>BASIC HELIX-LOOP-HELIX 39 (BHLH39)</i>                                 | Encodes a member of the basic helix-loop-helix transcription factor protein.                                                                                                                                                                           | protein_coding | bHLH      | ✓                        |                  |
| Brown  | AT3G57090       | <i>FISSION 1A (FIS1A); (BIGYIN)</i>                                       | Encodes a protein with similarity to yeast FIS proteins; these membrane anchored proteins bind DRP proteins and function during organelle division                                                                                                     | protein_coding | -         |                          |                  |
| Brown  | AT5G13070       | <i>AT5G13070</i>                                                          | MSF1-like family protein                                                                                                                                                                                                                               | protein_coding | -         |                          |                  |
| Brown  | AT5G39850       | <i>RPS9C</i>                                                              | Ribosomal protein S4                                                                                                                                                                                                                                   | protein_coding | -         |                          |                  |
| Brown  | AT5G44380       | <i>AT5G44380 (AtBBE24)</i>                                                | FAD-binding Berberine family protein                                                                                                                                                                                                                   | protein_coding | -         | ✓                        |                  |
| Brown  | AT5G55200       | <i>MITOCHONDRIAL GRPE 1 (MGE1)</i>                                        | Co-chaperone GrpE family protein                                                                                                                                                                                                                       | protein_coding | -         | ✓                        |                  |
| Cyan   | AT1G62520       | <i>AT1G62520</i>                                                          | sulfated surface-like glycoprotein                                                                                                                                                                                                                     | protein_coding | -         |                          |                  |
| Cyan   | AT1G74450       | <i>AT1G74450</i>                                                          | Plants overexpressing At1g74450 are stunted in height and have reduced male fertility.                                                                                                                                                                 | protein_coding | -         |                          |                  |
| Cyan   | AT2G30960       | <i>AT2G30960</i>                                                          | myosin-M heavy chain-like protein                                                                                                                                                                                                                      | protein_coding | -         |                          |                  |
| Cyan   | AT2G35450       | <i>AT2G35450</i>                                                          | catalytic/ hydrolase                                                                                                                                                                                                                                   | protein_coding | -         |                          |                  |
| Cyan   | AT3G15970       | <i>AT3G15970</i>                                                          | NUP50 (Nucleoporin 50 kDa) protein                                                                                                                                                                                                                     | protein_coding | -         |                          |                  |

|            |           |                                                                        |                                                                                                                                                                                                                                                                                                                                                         |                |  |  |  |         |
|------------|-----------|------------------------------------------------------------------------|---------------------------------------------------------------------------------------------------------------------------------------------------------------------------------------------------------------------------------------------------------------------------------------------------------------------------------------------------------|----------------|--|--|--|---------|
| Cyan       | AT3G16270 | <i>MODIFIED TRANSPORT TO THE VACUOLE1 (MTV1)</i>                       | Involved in the plant trans-Golgi network (TGN), where it is part of an adaptor protein (AP) complex to promote vesicle generation with different cargo specificity and destination                                                                                                                                                                     | protein_coding |  |  |  |         |
| Cyan       | AT3G50250 | <i>AT3G50250</i>                                                       | transmembrane protein                                                                                                                                                                                                                                                                                                                                   | protein_coding |  |  |  | -       |
| Cyan       | AT4G10750 | <i>AT4G10750</i>                                                       | Phosphoenolpyruvate carboxylase family protein                                                                                                                                                                                                                                                                                                          | protein_coding |  |  |  | -       |
| Cyan       | AT4G16490 | <i>AT4G16490</i>                                                       | ARM repeat superfamily protein                                                                                                                                                                                                                                                                                                                          | protein_coding |  |  |  | -       |
| Cyan       | AT5G01340 | <i>MITOCHONDRIAL SUCCINATE-FUMARATE CARRIER 1 (mSFC1)</i>              | Transports citrate, isocitrate and aconitate, succinate and fumarate. Catalyzes a fast counter-exchange transport as well as a low uniport of substrates. Might be involved in storage oil mobilization at early stages of seedling growth and in nitrogen assimilation in root tissue by catalyzing citrate/isocitrate or citrate/succinate exchanges. | protein_coding |  |  |  | -       |
| Darkgreen  | AT1G18440 | <i>AT1G18440</i>                                                       | Peptidyl-tRNA hydrolase family protein                                                                                                                                                                                                                                                                                                                  | protein_coding |  |  |  | -       |
| Darkgreen  | AT2G03150 | <i>SHORT ROOT IN SALT MEDIUM 1 (RSA1)</i>                              | Encodes a nuclear-localized calcium-binding protein RSA1 required for salt tolerance                                                                                                                                                                                                                                                                    | protein_coding |  |  |  | -       |
| Darkgreen  | AT2G48120 | <i>PALE CRESS (PAC)</i>                                                | The <i>pac</i> mutant affects chloroplast and leaf development; mutants are ABA-deficient and accumulate lower levels of carotenoids and chlorophyll compared to wild type. PAC binds 23srRNA and appears to be required for 50s ribosome assembly. PAC is essential for photoautotrophic growth.                                                       | protein_coding |  |  |  | -       |
| Darkgreen  | AT3G18480 | <i>CCAAT-DISPLACEMENT PROTEIN ALTERNATIVELY SPLICED PRODUCT (CASP)</i> | Predicted to encode a protein that functions as a Golgi apparatus structural component, known as a golgin in mammals and yeast.                                                                                                                                                                                                                         | protein_coding |  |  |  | -       |
| Darkgreen  | AT3G55050 | <i>D-CLADE TYPE 2C PROTEIN PHOSPHATASE 4 (PP2C.D4)</i>                 | Protein phosphatase 2C family protein                                                                                                                                                                                                                                                                                                                   | protein_coding |  |  |  | -       |
| Darkgreen  | AT4G17695 | <i>KANADI 3 (KAN3)</i>                                                 | Homeodomain-like superfamily protein                                                                                                                                                                                                                                                                                                                    | protein_coding |  |  |  | G2-like |
| Darkgreen  | AT5G26605 | <i>AT5G26605</i>                                                       | D111/G-patch domain-containing protein                                                                                                                                                                                                                                                                                                                  | protein_coding |  |  |  | -       |
| Darkgreen  | AT5G59750 | <i>HOMOLOG OF RIBA 3 (RIBA3)</i>                                       | monofunctional riboflavin biosynthesis protein RIBA 3                                                                                                                                                                                                                                                                                                   | protein_coding |  |  |  | -       |
| Darkgreen  | AT5G65930 | <i>ZWICHEL (ZWI)</i>                                                   | encodes a novel member of the kinesin superfamily of motor proteins. Recessive mutations have reduced number of trichome branches.                                                                                                                                                                                                                      | protein_coding |  |  |  | -       |
| Darkgreen  | AT5G67020 | <i>AT5G67020</i>                                                       | hypothetical protein                                                                                                                                                                                                                                                                                                                                    | protein_coding |  |  |  | -       |
| Darkgrey   | AT1G10870 | <i>ARF-GAP DOMAIN 4 (AGD4)</i>                                         | A member of ARF GAP domain (AGD), A thaliana has 15 members, grouped into four classes. AGD4 belongs to the Class 1, together with AGD1, AGD2, and AGD3.                                                                                                                                                                                                | protein_coding |  |  |  | -       |
| Darkgrey   | AT1G16330 | <i>CYCLIN B3;1 (CYCB3;1)</i>                                           | core cell cycle genes                                                                                                                                                                                                                                                                                                                                   | protein_coding |  |  |  | -       |
| Darkgrey   | AT1G28600 | <i>GUARD-CELL-ENRICHED GDSL LIPASE 2 (GGL2)</i>                        | GDSL-motif esterase/acyltransferase/lipase. Enzyme group with broad substrate specificity that may catalyze acyltransfer or hydrolase reactions with lipid and non-lipid substrates.                                                                                                                                                                    | protein_coding |  |  |  | -       |
| Darkgrey   | AT1G30600 | <i>AT1G30600</i>                                                       | Subtilase family protein                                                                                                                                                                                                                                                                                                                                | protein_coding |  |  |  | -       |
| Darkgrey   | AT1G75090 | <i>AT1G75090</i>                                                       | DNA glycosylase superfamily protein                                                                                                                                                                                                                                                                                                                     | protein_coding |  |  |  | -       |
| Darkgrey   | AT1G75390 | <i>BASIC LEUCINE-ZIPPER 44 (bZIP44)</i>                                | basic leucine-zipper 44                                                                                                                                                                                                                                                                                                                                 | protein_coding |  |  |  | bZIP    |
| Darkgrey   | AT2G01630 | <i>AT2G01630</i>                                                       | O-Glycosyl hydrolases family 17 protein                                                                                                                                                                                                                                                                                                                 | protein_coding |  |  |  | -       |
| Darkgrey   | AT2G41720 | <i>EMBRYO DEFECTIVE 2654 (EMB2654)</i>                                 | Encodes a pentatricopeptide repeat protein that is essential for trans-splicing of a chloroplast small ribosomal subunit transcript.                                                                                                                                                                                                                    | protein_coding |  |  |  | -       |
| Darkgrey   | AT3G61130 | <i>GALACTURONOSYLTRANSFERASE 1 (GAUT1)</i>                             | Encodes a protein with putative galacturonosyltransferase activity                                                                                                                                                                                                                                                                                      | protein_coding |  |  |  | -       |
| Darkgrey   | AT4G26370 | <i>AT4G26370</i>                                                       | antitermination NusB domain-containing protein                                                                                                                                                                                                                                                                                                          | protein_coding |  |  |  | -       |
| Darkorange | AT1G27760 | <i>SALT-TOLERANCE 32 (SAT32)</i>                                       | Encodes a protein with similarity to human interferon-related developmental regulator (IFRD) that is involved in salt tolerance. Loss of function mutations are hypersensitive to salt stress and have reduced fertility. SAT32 is found in the cytoplasm but appears to translocate to the nucleus when plants are subject to salt stress.             | protein_coding |  |  |  | -       |
| Darkorange | AT1G54220 | <i>MITOCHONDRIAL PYRUVATE DEHYDROGENASE SUBUNIT 2-3 (MTE2-3)</i>       | Encodes a subunit of the mitochondrial pyruvate dehydrogenase complex.                                                                                                                                                                                                                                                                                  | protein_coding |  |  |  | -       |
| Darkorange | AT1G75990 | <i>AT1G75990</i>                                                       | PAM domain (PCI/PINT associated module) protein                                                                                                                                                                                                                                                                                                         | protein_coding |  |  |  | -       |
| Darkorange | AT1G76810 | <i>AT1G76810 (EIF5B1)</i>                                              | eukaryotic translation initiation factor 2 (eIF-2) family protein                                                                                                                                                                                                                                                                                       | protein_coding |  |  |  | -       |
| Darkorange | AT3G01160 | <i>AT3G01160</i>                                                       | pre-rRNA-processing ESF1-like protein                                                                                                                                                                                                                                                                                                                   | protein_coding |  |  |  | -       |
| Darkorange | AT3G53350 | <i>ROP INTERACTIVE PARTNER 3 (RIP3)</i>                                | Encodes a microtubule-binding protein that is anchored to the plasma membrane domains and promotes local microtubule disassembly, forming as specific pattern of secondary walls in xylem vessel cells. Localized at microtubules and interacts with the plant-specific kinesin AtKinesin-13A.                                                          | protein_coding |  |  |  | -       |
| Darkorange | AT4G28310 | <i>AT4G28310</i>                                                       | microtubule-associated protein                                                                                                                                                                                                                                                                                                                          | protein_coding |  |  |  | -       |

|               |           |                                                                             |                                                                                                                                                                                                                                                                                             |                |          |
|---------------|-----------|-----------------------------------------------------------------------------|---------------------------------------------------------------------------------------------------------------------------------------------------------------------------------------------------------------------------------------------------------------------------------------------|----------------|----------|
| Darkorange    | AT5G19920 | <i>AT5G19920</i>                                                            | Transducin/WD40 repeat-like superfamily protein                                                                                                                                                                                                                                             | protein_coding | -        |
| Darkorange    | AT5G20470 | <i>HEADLESS DERIVATIVE OF MYOSIN XI-K (HDK)</i>                             | Encodes a headless derivative of myosin XI-K, which likely arose from a partial duplication of the XI-K gene and is developmentally regulated.                                                                                                                                              | protein_coding | -        |
| Darkorange    | AT5G43160 | <i>QWRF DOMAIN CONTAINING 9 (QWRF9)</i>                                     | QWRF motif protein (DUF566)                                                                                                                                                                                                                                                                 | protein_coding | -        |
| Darkred       | AT1G70780 | <i>AT1G70780</i>                                                            | hypothetical protein                                                                                                                                                                                                                                                                        | protein_coding | -        |
| Darkred       | AT4G17710 | <i>HOMEODOMAIN GLABROUS 4 (HDG4)</i>                                        | Encodes a homeobox-leucine zipper family protein belonging to the HD-ZIP IV family.                                                                                                                                                                                                         | protein_coding | Homeobox |
| Darkred       | AT4G30850 | <i>HEPTAHELICAL TRANSMEMBRANE PROTEIN2 (HHP2)</i>                           | heptahelical transmembrane protein homologous to human adiponectin receptors and progesterin receptors                                                                                                                                                                                      | protein_coding | -        |
| Darkred       | AT5G25520 | <i>AT5G25520</i>                                                            | SPOC domain / Transcription elongation factor S-II protein                                                                                                                                                                                                                                  | protein_coding | -        |
| Darkred       | ATCG00420 | <i>NADH DEHYDROGENASE SUBUNIT J (NDHJ)</i>                                  | Encodes NADH dehydrogenase subunit J. Its transcription is increased upon sulfur depletion.                                                                                                                                                                                                 | protein_coding | -        |
| Darkred       | ATCG00430 | <i>PHOTOSYSTEM II REACTION CENTER PROTEIN G (PSBG)</i>                      | Encodes a protein which was originally thought to be part of photosystem II but its wheat homolog was later shown to encode for subunit K of NADH dehydrogenase.                                                                                                                            | protein_coding | -        |
| Darkred       | ATCG00600 | <i>ATCG00600 (PETG)</i>                                                     | Cytochrome b6-f complex, subunit V. Disruption of homologous gene in <i>Chlamydomonas</i> results in disruption of cytochrome b6-f complex.                                                                                                                                                 | protein_coding | -        |
| Darkred       | ATCG00870 | <i>ATCG00870 (ORF77.1)</i>                                                  | Protein precursor Ycf15, putative, chloroplast                                                                                                                                                                                                                                              | protein_coding | -        |
| Darkred       | ATCG00890 | <i>NAD(P)H-QUINONE OXIDOREDUCTASE SUBUNIT 2 A (NDHB.1)</i>                  | NADH dehydrogenase ND2                                                                                                                                                                                                                                                                      | protein_coding | -        |
| Darkred       | ATCG01070 | <i>NAD(P)H-QUINONE OXIDOREDUCTASE SUBUNIT 4L (NDHE)</i>                     | NADH dehydrogenase ND4L                                                                                                                                                                                                                                                                     | protein_coding | -        |
| Darkturquoise | AT1G16780 | <i>AVP1-LIKE PROTEIN 2 (VHP2;2)</i>                                         | Encodes a type II H <sup>+</sup> -PPases that localizes to and function as a proton pump of the Golgi apparatus in most tissues except for mature leaves.                                                                                                                                   | protein_coding | -        |
| Darkturquoise | AT1G20380 | <i>PROLYL-OLIGOPEPTIDASE ASSOCIATED WITH QUANTITATIVE RESISTANCE (POQR)</i> | Putative prolyl oligopeptidase, associated with quantitative disease resistance to <i>S. sclerotiorum</i> .                                                                                                                                                                                 | protein_coding | -        |
| Darkturquoise | AT1G31730 | <i>ADAPTOR PROTEIN COMPLEX 4E (AP4E)</i>                                    | Encodes a component of the AP4 complex and is involved in vacuolar sorting of storage proteins.                                                                                                                                                                                             | protein_coding | -        |
| Darkturquoise | AT1G65410 | <i>ATP-BINDING CASSETTE 113 (ABC113)</i>                                    | Encodes a member of NAP subfamily of transporters. Mutations in this gene suppress the low temperature-induced phenotype of Arabidopsis tocopherol-deficient mutant <i>vte2</i> .                                                                                                           | protein_coding | -        |
| Darkturquoise | AT1G74040 | <i>2-ISOPROPYLMALATE SYNTHASE 1 (IMS1)</i>                                  | Encodes an active Arabidopsis isopropylmalate synthase IPMS2. Involved in leucine biosynthesis. Expressed constitutively throughout the plant. Loss of IPMS2 can be compensated by a second isopropylmalate synthase gene IPMS1 (At1g18500).                                                | protein_coding | -        |
| Darkturquoise | AT2G20140 | <i>REGULATORY PARTICLE AAA-ATPASE 2B (RPT2b)</i>                            | Encodes one of the two RPT2 (26S proteasome subunit RPT2) paralogs: RPT2a (At4g29040) and RPT2b (At2g20140). RPT2b can not complement the <i>rpt2a</i> mutant phenotype. <i>rpt2a rpt2b</i> double mutants are embryo lethal.                                                               | protein_coding | -        |
| Darkturquoise | AT2G30920 | <i>COENZYME Q 3 (COQ3)</i>                                                  | Encodes the enzyme which catalyzes the methylation of nonaprenyldihydroxybenzoate as it is the prevalent polyprenoid in Arabidopsis. The enzyme is a mitochondrial-localized methyltransferase involved in ubiquinone biosynthesis.                                                         | protein_coding | -        |
| Darkturquoise | AT3G09570 | <i>AT3G09570 (TTM2)</i>                                                     | Lung seven transmembrane receptor family protein                                                                                                                                                                                                                                            | protein_coding | -        |
| Darkturquoise | AT5G51660 | <i>CLEAVAGE AND POLYADENYLATION SPECIFICITY FACTOR 160 (CPSF160)</i>        | cleavage and polyadenylation specificity factor 160                                                                                                                                                                                                                                         | protein_coding | -        |
| Darkturquoise | AT5G58530 | <i>AT5G58530</i>                                                            | Glutaredoxin family protein                                                                                                                                                                                                                                                                 | protein_coding | -        |
| Green         | AT1G17680 | <i>AT1G17680</i>                                                            | tetratricopeptide repeat (TPR)-containing protein                                                                                                                                                                                                                                           | protein_coding | -        |
| Green         | AT1G27930 | <i>AT1G27930 (AGM1)</i>                                                     | Arabinogalactan methyltransferase, involved in arabinogalactan glucuronic acid methylation. Interacts with eIF3.                                                                                                                                                                            | protein_coding | -        |
| Green         | AT1G28120 | <i>OTU DOMAIN CONTAINING DUB 1 (OTU1)</i>                                   | Deubiquitinase with preference towards M1 and K48 linkages.                                                                                                                                                                                                                                 | protein_coding | -        |
| Green         | AT1G71010 | <i>FORMS APLOID AND BINUCLEATE CELLS 1C (FAB1C)</i>                         | Encodes a protein that is predicted to act as a phosphatidylinositol-3P 5-kinase, but, because it lacks a FYVE domain, it is unlikely to be efficiently targeted to membranes containing the proposed phosphatidylinositol-3P substrate. Therefore, its molecular function remains unknown. | protein_coding | -        |
| Green         | AT1G75130 | <i>CYTOCHROME P450, FAMILY 721, SUBFAMILY A, POLYPEPTIDE 1 (CYP721A1)</i>   | member of CYP721A                                                                                                                                                                                                                                                                           | protein_coding | -        |
| Green         | AT2G32280 | <i>VASCULATURE COMPLEXITY AND CONNECTIVITY (VCC)</i>                        | Encodes a member of a plant-specific gene family that is required for embryo provascular development. The gene product regulates vascular network complexity and connectivity in cotyledons.                                                                                                | protein_coding | -        |

✓

✓

|             |           |                                                                           |                                                                                                                                                                                                                                                                                                                                                       |                |        |
|-------------|-----------|---------------------------------------------------------------------------|-------------------------------------------------------------------------------------------------------------------------------------------------------------------------------------------------------------------------------------------------------------------------------------------------------------------------------------------------------|----------------|--------|
| Green       | AT2G42280 | <i>FLOWERING BHLH 4 (FBH4)</i>                                            | basic helix-loop-helix (bHLH) DNA-binding superfamily protein                                                                                                                                                                                                                                                                                         | protein_coding | bHLH   |
| Green       | AT5G51710 | <i>K+ EFFLUX ANTIPORTER 5 (KEA5)</i>                                      | member of Putative potassium proton antiporter family                                                                                                                                                                                                                                                                                                 | protein_coding | -      |
| Green       | AT5G63990 | <i>AT5G63990</i>                                                          | Inositol monophosphatase family protein                                                                                                                                                                                                                                                                                                               | protein_coding | -      |
| Green       | AT5G65390 | <i>ARABINOGALACTAN PROTEIN 7 (AGP7)</i>                                   | arabinogalactan protein 7                                                                                                                                                                                                                                                                                                                             | protein_coding | -      |
| Greenyellow | AT1G14380 | <i>IQ-DOMAIN 28 (IQD28)</i>                                               | Encodes a microtubule-associated protein. Member of IQ67 (CaM binding) domain containing family.                                                                                                                                                                                                                                                      | protein_coding | -      |
| Greenyellow | AT1G19010 | <i>AT1G19010</i>                                                          | hypothetical protein                                                                                                                                                                                                                                                                                                                                  | protein_coding | -      |
| Greenyellow | AT1G67080 | <i>ABSCISIC ACID (ABA)-DEFICIENT 4 (ABA4)</i>                             | Encodes a protein involved in the photoprotection of PSII. An aba4-1 mutant completely lacks neoxanthin, a component of the chromophore of the peripheral antenna system in PSII. ABA4 is required for neoxanthin biosynthesis, an intermediary step in abscisic acid biosynthesis, but no catalytic activity has been detected for the ABA4 protein. | protein_coding | -      |
| Greenyellow | AT2G02710 | <i>PAS/LOV PROTEIN B (PLPB)</i>                                           | Encodes a putative blue light receptor protein.                                                                                                                                                                                                                                                                                                       | protein_coding | -      |
| Greenyellow | AT2G40420 | <i>AT2G40420</i>                                                          | Encodes a putative amino acid transporter                                                                                                                                                                                                                                                                                                             | protein_coding | -      |
| Greenyellow | AT3G26330 | <i>CYTOCHROME P450, FAMILY 71, SUBFAMILY B, POLYPEPTIDE 37 (CYP71B37)</i> | putative cytochrome P450                                                                                                                                                                                                                                                                                                                              | protein_coding | -      |
| Greenyellow | AT4G01895 | <i>AT4G01895</i>                                                          | systemic acquired resistance (SAR) regulator protein NIMIN-1-like protein                                                                                                                                                                                                                                                                             | protein_coding | -      |
| Greenyellow | AT4G29890 | <i>AT4G29890</i>                                                          | choline monoxygenase, putative (CMO-like)                                                                                                                                                                                                                                                                                                             | protein_coding | -      |
| Greenyellow | AT5G27560 | <i>AT5G27560</i>                                                          | DUF1995 domain protein, putative (DUF1995)                                                                                                                                                                                                                                                                                                            | protein_coding | -      |
| Greenyellow | AT5G54540 | <i>AT5G54540</i>                                                          | Uncharacterized conserved protein (UCP012943)                                                                                                                                                                                                                                                                                                         | protein_coding | -      |
| Grey60      | AT1G06040 | <i>SALT TOLERANCE (STO)</i>                                               | Encodes salt tolerance protein (STO) which confers salt tolerance to yeast cells. STO co-localizes with COP1 and plays a role in light signaling. STO transcript levels are regulated by photoperiod and phytohormones. STO competes with FLC in the regulation of floral transition genes SOC1 and FT.                                               | protein_coding | Orphan |
| Grey60      | AT1G65870 | <i>AT1G65870</i>                                                          | Disease resistance-responsive (dirigent-like protein) family protein                                                                                                                                                                                                                                                                                  | protein_coding | -      |
| Grey60      | AT3G02360 | <i>6-PHOSPHOGLUCONATE DEHYDROGENASE 2 (PGD2)</i>                          | 6-phosphogluconate dehydrogenase family protein                                                                                                                                                                                                                                                                                                       | protein_coding | -      |
| Grey60      | AT4G20930 | <i>HYDROXYISOBUTYRATE DEHYDROGENASE 1 (HDH1)</i>                          | Encodes a 3-hydroxyisobutyrate dehydrogenase                                                                                                                                                                                                                                                                                                          | protein_coding | -      |
| Grey60      | AT4G35040 | <i>BASIC LEUCINE ZIPPER 19 (bZIP19)</i>                                   | Basic-region leucine zipper (bZIP19) transcription factor involved in the adaptation to zinc deficiency. Binds ZDRE motifs                                                                                                                                                                                                                            | protein_coding | bZIP   |
| Grey60      | AT5G02840 | <i>LHY/CCA1-LIKE 1 (LCL1)</i>                                             | Encodes RVE4, a homolog of the circadian rhythm regulator RVE8. rve4 rve6 rve8 triple mutants display an extremely long circadian period, with delayed and reduced expression of evening-phased clock genes. Involved in heat shock response.                                                                                                         | protein_coding | -      |
| Grey60      | AT5G08380 | <i>ALPHA-GALACTOSIDASE 1 (AGAL1)</i>                                      | alpha-galactosidase 1                                                                                                                                                                                                                                                                                                                                 | protein_coding | -      |
| Grey60      | AT5G32450 | <i>BPA1-LIKE 4 (BPL4)</i>                                                 | ACD11 binding partner, negatively regulates ROS-mediated defense response                                                                                                                                                                                                                                                                             | protein_coding | -      |
| Grey60      | AT5G60820 | <i>AT5G60820</i>                                                          | RING/U-box superfamily protein                                                                                                                                                                                                                                                                                                                        | protein_coding | C3H    |
| Grey60      | AT5G64880 | <i>AT5G64880</i>                                                          | transmembrane protein                                                                                                                                                                                                                                                                                                                                 | protein_coding | -      |
| Lightcyan   | AT1G30460 | <i>CLEAVAGE AND POLYADENYLATION SPECIFICITY FACTOR 30 (CPSF30)</i>        | Encodes AtCPSF30, the 30-KDa subunit of cleavage and polyadenylation specificity factor. AtCPSF30 is a probable processing endonuclease. Nucleus-localized RNA binding protein capable of interacting with itself and with calmodulin. Its RNA-binding activity is inhibited by calmodulin in a calcium-dependent fashion.                            | protein_coding | -      |
| Lightcyan   | AT1G78650 | <i>POLD3</i>                                                              | Similar to DNA polymerase delta (POLD3), which in other organism was shown to be involved in the elongation of DNA replication.                                                                                                                                                                                                                       | protein_coding | -      |
| Lightcyan   | AT2G15400 | <i>NRPE3B</i>                                                             | Non-catalytic subunit of Nuclear DNA-dependent RNA polymerase V; homologous to budding yeast RPB3 and the E. coli RNA polymerase alpha subunit. A closely related paralog, At2g15430 can substitute for At2g15400 in the context of Pol V and encodes the equivalent subunit of Pol II and Pol IV.                                                    | protein_coding | -      |
| Lightcyan   | AT2G41520 | <i>TETRATRICOPEPTIDE REPEAT 15 (TPR15)</i>                                | Encodes one of the 36 carboxylate clamp (CC)-tetratricopeptide repeat (TPR) proteins with potential to interact with Hsp90/Hsp70 as co-chaperones.                                                                                                                                                                                                    | protein_coding | -      |
| Lightcyan   | AT2G47980 | <i>SISTER-CHROMATID COHESION PROTEIN 3 (SCC3)</i>                         | Essential to the monopolar orientation of the kinetochores during meiosis.                                                                                                                                                                                                                                                                            | protein_coding | -      |
| Lightcyan   | AT4G36690 | <i>AT4G36690 (ATU2AF65A)</i>                                              | Regulates flowering time and displays a redundant role in pollen tube growth together with AtU2AF65b.                                                                                                                                                                                                                                                 | protein_coding | -      |
| Lightcyan   | AT4G39050 | <i>KINESIN 7.4 (KIN7.4)</i>                                               | Kinesin motor family protein                                                                                                                                                                                                                                                                                                                          | protein_coding | -      |
| Lightcyan   | AT5G14720 | <i>TARGET OF TEMPERATURE3 (TOT3)</i>                                      | Membrane-localized protein kinase which regulates thermomorphogenesis.                                                                                                                                                                                                                                                                                | protein_coding | -      |
| Lightcyan   | AT5G26360 | <i>CHAPERONIN CONTAINING T-COMPLEX POLYPEPTIDE-1 SUBUNIT 3 (CCT3)</i>     | TCP-1/cpn60 chaperonin family protein                                                                                                                                                                                                                                                                                                                 | protein_coding | -      |

|             |           |                                                        |                                                                                                                                                                                                                                                                                                                                                                                                                                                                                                                                                       |                           |             |
|-------------|-----------|--------------------------------------------------------|-------------------------------------------------------------------------------------------------------------------------------------------------------------------------------------------------------------------------------------------------------------------------------------------------------------------------------------------------------------------------------------------------------------------------------------------------------------------------------------------------------------------------------------------------------|---------------------------|-------------|
| Lightcyan   | AT5G54910 | <i>AT5G54910</i>                                       | DEA(D/H)-box RNA helicase family protein                                                                                                                                                                                                                                                                                                                                                                                                                                                                                                              | protein_coding            | -           |
| Lightgreen  | AT1G50160 | <i>AT1G50160</i>                                       | ribonuclease H superfamily polynucleotidyl transferase                                                                                                                                                                                                                                                                                                                                                                                                                                                                                                | protein_coding            | -           |
| Lightgreen  | AT2G11560 | <i>AT2G11560</i>                                       | Mutator-like transposase / similar to MURA transposase of maize                                                                                                                                                                                                                                                                                                                                                                                                                                                                                       | transposable_element_gene | -           |
| Lightgreen  | AT2G34520 | <i>MITOCHONDRIAL RIBOSOMAL PROTEIN S14 (RPS14)</i>     | nuclear-encoded mitochondrial ribosomal protein S14                                                                                                                                                                                                                                                                                                                                                                                                                                                                                                   | protein_coding            | -           |
| Lightgreen  | AT3G33066 | <i>AT3G33066</i>                                       | transposable_element_gene; belonging to gypsy-like retrotransposon family                                                                                                                                                                                                                                                                                                                                                                                                                                                                             | transposable_element_gene | -           |
| Lightgreen  | AT4G02480 | <i>AT4G02480</i>                                       | AAA-type ATPase family protein                                                                                                                                                                                                                                                                                                                                                                                                                                                                                                                        | protein_coding            | -           |
| Lightgreen  | AT4G20530 | <i>AT4G20530</i>                                       | cysteine-rich repeat secretory-like protein                                                                                                                                                                                                                                                                                                                                                                                                                                                                                                           | protein_coding            | -           |
| Lightgreen  | AT5G32430 | <i>AT5G32430</i>                                       | transposable_element_gene;pseudogene, hypothetical protein                                                                                                                                                                                                                                                                                                                                                                                                                                                                                            | transposable_element_gene | -           |
| Lightgreen  | ATCG01010 | <i>NAD(P)H-QUINONE OXIDOREDUCTASE SUBUNIT 5 (NDHF)</i> | Chloroplast encoded NADH dehydrogenase unit                                                                                                                                                                                                                                                                                                                                                                                                                                                                                                           | protein_coding            | -           |
| Lightgreen  | ATMG00120 | <i>ATMG00120 (ORF143)</i>                              | reverse transcriptase zinc-binding protein                                                                                                                                                                                                                                                                                                                                                                                                                                                                                                            | protein_coding            | -           |
| Lightgreen  | ATMG01290 | <i>ATMG01290 (ORF111C)</i>                             | hypothetical protein                                                                                                                                                                                                                                                                                                                                                                                                                                                                                                                                  | protein_coding            | -           |
| Lightyellow | AT1G31870 | <i>BUD SITESELECTION PROTEIN 13 (BUD13)</i>            | Ortholog of yeast BUD13 RES complex protein. Functions in pre mRNA processing of RNAs expressed in embryos.                                                                                                                                                                                                                                                                                                                                                                                                                                           | protein_coding            | -           |
| Lightyellow | AT1G69770 | <i>CHROMOMETHYLASE 3 (CMT3)</i>                        | Encodes a chromomethylase involved in methylating cytosine residues at non-CG sites. Involved in preferentially methylating transposon-related sequences, reducing their mobility. CMT3 interacts with an Arabidopsis homologue of HP1 (heterochromatin protein 1), which in turn interacts with methylated histones. Involved in gene silencing.                                                                                                                                                                                                     | protein_coding            | -           |
| Lightyellow | AT3G44530 | <i>HOMOLOG OF HISTONE CHAPERONE HIRA (HIRA)</i>        | Encodes a nuclear localized WD-repeat containing protein involved in negative regulation of knox gene expression via epigenetic mechanism of chromatin re-organization. It is a part of the HISTONE REGULATOR complex that deposits histones in a DNA synthesis-independent manner and affects both nucleosome occupancy and the maintenance of transcriptional silencing. Interacts physically and genetically with AS1. Expressed in meristem and leaf primordia. Homozygous mutants are embryo lethal.                                             | protein_coding            | -           |
| Lightyellow | AT4G16660 | <i>HEAT SHOCK PROTEIN 70 (HSP70)</i>                   | heat shock protein 70 (Hsp 70) family protein                                                                                                                                                                                                                                                                                                                                                                                                                                                                                                         | protein_coding            | -           |
| Lightyellow | AT4G35990 | <i>AT4G35990</i>                                       | hypothetical protein                                                                                                                                                                                                                                                                                                                                                                                                                                                                                                                                  | protein_coding            | -           |
| Lightyellow | AT4G38040 | <i>AT4G38040</i>                                       | Exostosin family protein                                                                                                                                                                                                                                                                                                                                                                                                                                                                                                                              | protein_coding            | -           |
| Lightyellow | AT4G39680 | <i>AT4G39680</i>                                       | SAP domain-containing protein                                                                                                                                                                                                                                                                                                                                                                                                                                                                                                                         | protein_coding            | -           |
| Lightyellow | AT5G02310 | <i>PROTEOLYSIS 6 (PRT6)</i>                            | Encodes PROTEOLYSIS6 (PRT6), a component of the N-end rule pathway that targets protein degradation through the identity of the amino-terminal residue of specific protein substrates. Another component of the N-end rule pathway is arginyl-tRNA:protein arginyltransferase (ATE). PRT6 and ATE were shown to regulate seed after-ripening, seedling sugar sensitivity, seedling lipid breakdown, and abscisic acid (ABA) sensitivity of germination.                                                                                               | protein_coding            | -           |
| Lightyellow | AT5G25150 | <i>TBP-ASSOCIATED FACTOR 5 (TAF5)</i>                  | Encodes a putative TATA-binding-protein associated factor TAF5. TAFs are subunits of the general transcription factor IID (TFIID).                                                                                                                                                                                                                                                                                                                                                                                                                    | protein_coding            | -           |
| Lightyellow | AT5G46710 | <i>AT5G46710</i>                                       | PLATZ transcription factor family protein                                                                                                                                                                                                                                                                                                                                                                                                                                                                                                             | protein_coding            | -           |
| Magenta     | AT1G09770 | <i>CELL DIVISION CYCLE 5 (CDC5)</i>                    | Member of MYB3R- and R2R3- type MYB- encoding genes. Essential for plant innate immunity. Interacts with MOS4 and PRL1.                                                                                                                                                                                                                                                                                                                                                                                                                               | protein_coding            | MYB-related |
| Magenta     | AT1G72400 | <i>AT1G72400</i>                                       | hypothetical protein                                                                                                                                                                                                                                                                                                                                                                                                                                                                                                                                  | protein_coding            | -           |
| Magenta     | AT2G20690 | <i>AT2G20690</i>                                       | A synthetic gene encoding the catalytic domain of the Arabidopsis thaliana gene At2g20690 was recombinant expressed in E. coli demonstrating the molecular function of riboflavin synthase.                                                                                                                                                                                                                                                                                                                                                           | protein_coding            | -           |
| Magenta     | AT2G43370 | <i>SNRNP35</i>                                         | RNA-binding (RRM/RBD/RNP motifs) family protein                                                                                                                                                                                                                                                                                                                                                                                                                                                                                                       | protein_coding            | -           |
| Magenta     | AT3G19570 | <i>SNOWY COTYLEDON 3 (SCO3)</i>                        | Encodes SCO3 (snowy cotyledon3), a member of a largely uncharacterized protein family unique to the plant kingdom. The sco3-1 mutation alters chloroplast morphology and development, reduces chlorophyll accumulation, impairs thylakoid formation and photosynthesis in seedlings, and results in photoinhibition under extreme CO <sub>2</sub> concentrations in mature leaves. SCO3 is targeted to the periphery of peroxisomes. Together with QWRF2 redundantly modulates cortical microtubule arrangement in floral organ growth and fertility. | protein_coding            | -           |
| Magenta     | AT3G55460 | <i>SC35-LIKE SPLICING FACTOR 30 (SCL30)</i>            | encodes an SC35-like splicing factor that is localized to nuclear specks                                                                                                                                                                                                                                                                                                                                                                                                                                                                              | protein_coding            | -           |

|              |           |                                                                      |                                                                                                                                                                                                                                                                                                                                                                                                                                                 |                           |     |
|--------------|-----------|----------------------------------------------------------------------|-------------------------------------------------------------------------------------------------------------------------------------------------------------------------------------------------------------------------------------------------------------------------------------------------------------------------------------------------------------------------------------------------------------------------------------------------|---------------------------|-----|
| Magenta      | AT5G22400 | <i>AT5G22400</i>                                                     | Rho GTPase activating protein with PAK-box/P21-Rho-binding domain-containing protein                                                                                                                                                                                                                                                                                                                                                            | protein_coding            | -   |
| Magenta      | AT5G23340 | <i>AT5G23340</i>                                                     | RNI-like superfamily protein                                                                                                                                                                                                                                                                                                                                                                                                                    | protein_coding            | -   |
| Magenta      | AT5G50300 | <i>AZA-GUANINE RESISTANT2 (AZG2)</i>                                 | Encodes a homolog of the adenine-guanine-hypoxanthine transporter AzgA of <i>Aspergillus nidulans</i> . Function as a plant adenine-guanine transporter. Two closely related genes exist in Arabidopsis: AT3G10960 ( <i>Azg1</i> ) and AT5G50300 ( <i>Azg2</i> ).                                                                                                                                                                               | protein_coding            | - ✓ |
| Magenta      | AT5G58190 | <i>EVOLUTIONARILY CONSERVED C-TERMINAL REGION 10 (ECT10)</i>         | evolutionarily conserved C-terminal region 10                                                                                                                                                                                                                                                                                                                                                                                                   | protein_coding            | -   |
| Midnightblue | AT1G15960 | <i>NRAMP METAL ION TRANSPORTER 6 (NRAMP6)</i>                        | member of Nramp2 family                                                                                                                                                                                                                                                                                                                                                                                                                         | protein_coding            | -   |
| Midnightblue | AT1G21510 | <i>AT1G21510</i>                                                     | TPRXL                                                                                                                                                                                                                                                                                                                                                                                                                                           | protein_coding            | -   |
| Midnightblue | AT1G23530 | <i>AT1G23530</i>                                                     | transmembrane protein                                                                                                                                                                                                                                                                                                                                                                                                                           | protein_coding            | -   |
| Midnightblue | AT2G01450 | <i>MAP KINASE 17 (MPK17)</i>                                         | MPK17 Map kinase family member. Mutants have increased numbers of peroxisomes a phenotype that can be suppressed by mutations in PMD1. This and other treatments, suggests a function in control of peroxisome proliferation in salt stress.                                                                                                                                                                                                    | protein_coding            | -   |
| Midnightblue | AT2G23530 | <i>AT2G23530</i>                                                     | Zinc-finger domain of monoamine-oxidase A repressor R1                                                                                                                                                                                                                                                                                                                                                                                          | protein_coding            | -   |
| Midnightblue | AT2G23940 | <i>AT2G23940</i>                                                     | transmembrane protein (DUF788)                                                                                                                                                                                                                                                                                                                                                                                                                  | protein_coding            | -   |
| Midnightblue | AT3G01210 | <i>BPA1 LIKE 6 (BPL6)</i>                                            | ACD11 binding partner, may be involved in negative regulation of ROS-mediated defense response.                                                                                                                                                                                                                                                                                                                                                 | protein_coding            | -   |
| Midnightblue | AT3G19930 | <i>SUGAR TRANSPORTER 4 (STP4)</i>                                    | Encodes a sucrose hydrogen symporter that is induced by wounding                                                                                                                                                                                                                                                                                                                                                                                | protein_coding            | -   |
| Midnightblue | AT4G11370 | <i>RING-H2 FINGER A1A (RHA1A)</i>                                    | Encodes a putative RING-H2 finger protein RHA1a.                                                                                                                                                                                                                                                                                                                                                                                                | protein_coding            | -   |
| Midnightblue | AT5G06080 | <i>LOB DOMAIN-CONTAINING PROTEIN 33 (LBD33)</i>                      | LOB domain-containing protein 33                                                                                                                                                                                                                                                                                                                                                                                                                | protein_coding            | -   |
| Orange       | AT1G05300 | <i>ZINC TRANSPORTER 5 PRECURSOR (ZIP5)</i>                           | member of Fe(II) transporter isolog family                                                                                                                                                                                                                                                                                                                                                                                                      | protein_coding            | -   |
| Orange       | AT1G24706 | <i>THO COMPLEX SUBUNIT 2 (THO2); EMBRYO DEFECTIVE 2793 (EMB2793)</i> | Encodes a component of the putative Arabidopsis THO/TREX complex. Mutants of THO3/TEX1, THO1, THO6 accumulate reduced amount of small interfering (si)RNA, suggesting a role of the putative Arabidopsis THO/TREX in siRNA biosynthesis. Mutations in THO have severe developmental defects and affect the production of several different classes of small RNAs indicating a broader role in small RNA biosynthesis.                           | .                         | - ✓ |
| Orange       | AT1G54680 | <i>AT1G54680</i>                                                     | translation initiation factor 3 subunit I                                                                                                                                                                                                                                                                                                                                                                                                       | protein_coding            | -   |
| Orange       | AT3G18680 | <i>PLASTID 55 UMP KINASE (PUMPKIN)</i>                               | Encodes a functional UMP Kinase located in the plastid that binds to group II intron plastid transcription products. Mutants show decreased accumulation of target transcripts/proteins.                                                                                                                                                                                                                                                        | protein_coding            | -   |
| Orange       | AT4G26750 | <i>EXTENSIN-LIKE (EXT-like); LYST-INTERACTING PROTEIN5 (LIP5)</i>    | Encodes a protein involved in mediating plant responses to pathogenesis. Loss of function mutations have increased susceptibility to bacterial pathogens and are defective in pathogen induced endocytosis and vesicle trafficking. LIP5 physically interacts with SKD1 and that interaction is required for its resistance phenotype. LIP5 is phosphorylated by MPK3 and MPK6, both of which are components of the disease resistance pathway. | protein_coding            | -   |
| Orange       | AT4G32900 | <i>AT4G32900</i>                                                     | Peptidyl-tRNA hydrolase II (PTH2) family protein                                                                                                                                                                                                                                                                                                                                                                                                | protein_coding            | -   |
| Orange       | AT5G16140 | <i>AT5G16140</i>                                                     | Peptidyl-tRNA hydrolase family protein                                                                                                                                                                                                                                                                                                                                                                                                          | protein_coding            | -   |
| Orange       | AT5G37850 | <i>SALT OVERLY SENSITIVE 4 (SOS4)</i>                                | Encodes a pyridoxal kinase required for root hair development. Mutants are hypersensitive to Na <sup>+</sup> , K <sup>+</sup> and Li <sup>+</sup> .                                                                                                                                                                                                                                                                                             | protein_coding            | -   |
| Orange       | AT5G43490 | <i>AT5G43490</i>                                                     | myb-like protein X                                                                                                                                                                                                                                                                                                                                                                                                                              | protein_coding            | -   |
| Orange       | AT5G59210 | <i>AT5G59210</i>                                                     | myosin heavy chain-like protein                                                                                                                                                                                                                                                                                                                                                                                                                 | protein_coding            | -   |
| Pink         | AT1G05800 | <i>DONGLE (DGL)</i>                                                  | Encodes a galactolipase. Located in the chloroplast. Involved in the initial step of jasmonic acid biosynthesis. Expressed in vegetative tissues and is necessary for the biosynthesis of basal-level JAs in vegetative tissues.                                                                                                                                                                                                                | protein_coding            | -   |
| Pink         | AT1G10070 | <i>BRANCHED-CHAIN AMINO ACID TRANSAMINASE 2 (BCAT-2)</i>             | Encodes a chloroplast branched-chain amino acid aminotransferase. Complements the yeast leu/iso-leu/val auxotrophy mutant. Involved in cell wall development.                                                                                                                                                                                                                                                                                   | protein_coding            | -   |
| Pink         | AT1G19540 | <i>AT1G19540</i>                                                     | NmrA-like negative transcriptional regulator family protein                                                                                                                                                                                                                                                                                                                                                                                     | protein_coding            | - ✓ |
| Pink         | AT1G26400 | <i>BERBERINE BRIDGE ENZYME-LIKE 5 (ATBBE5)</i>                       | FAD-binding Berberine family protein                                                                                                                                                                                                                                                                                                                                                                                                            | protein_coding            | -   |
| Pink         | AT2G29300 | <i>AT2G29300</i>                                                     | NAD(P)-binding Rossmann-fold superfamily protein                                                                                                                                                                                                                                                                                                                                                                                                | protein_coding            | -   |
| Pink         | AT2G32540 | <i>CELLULOSE SYNTHASE-LIKE B4 (CSLB04)</i>                           | encodes a gene similar to cellulose synthase                                                                                                                                                                                                                                                                                                                                                                                                    | protein_coding            | -   |
| Pink         | AT3G42820 | <i>AT3G42820</i>                                                     | transposable_element_gene; similar to Ulp1 protease family protein                                                                                                                                                                                                                                                                                                                                                                              | transposable_element_gene | -   |
| Pink         | AT3G45990 | <i>AT3G45990</i>                                                     | Cofilin/tropomyosin-type actin-binding protein family                                                                                                                                                                                                                                                                                                                                                                                           | protein_coding            | -   |

|           |           |                                                                           |                                                                                                                                                                                                                                                                                                                                                                                                                                                                           |                |     |
|-----------|-----------|---------------------------------------------------------------------------|---------------------------------------------------------------------------------------------------------------------------------------------------------------------------------------------------------------------------------------------------------------------------------------------------------------------------------------------------------------------------------------------------------------------------------------------------------------------------|----------------|-----|
| Pink      | AT3G53980 | <i>AT3G53980</i>                                                          | Bifunctional inhibitor/lipid-transfer protein/seed storage 2S albumin superfamily protein                                                                                                                                                                                                                                                                                                                                                                                 | protein_coding | -   |
| Pink      | AT5G12270 | <i>AT5G12270</i>                                                          | 2-oxoglutarate (2OG) and Fe(II)-dependent oxygenase superfamily protein                                                                                                                                                                                                                                                                                                                                                                                                   | protein_coding | -   |
| Purple    | AT1G58360 | <i>AMINO ACID PERMEASE 1 (AAP1)</i>                                       | Encodes AAP1 (amino acid permease 1), a neutral amino acid transporter expressed in seeds. Functions in amino acid uptake into embryos. The transporter also functions in acquisition of glutamate and neutral amino acids by the root.                                                                                                                                                                                                                                   | protein_coding | -   |
| Purple    | AT2G04530 | <i>TRNASE Z 2 (TRZ2); (CPZ)</i>                                           | Encodes a protein with RNase Z activity suggesting a role in tRNA processing. Protein contains a signal sequence for import into the chloroplast.                                                                                                                                                                                                                                                                                                                         | protein_coding | -   |
| Purple    | AT2G21450 | <i>CHROMATIN REMODELING 34 (CHR34)</i>                                    | chromatin remodeling 34                                                                                                                                                                                                                                                                                                                                                                                                                                                   | protein_coding | -   |
| Purple    | AT2G39650 | <i>AT2G39650</i>                                                          | cruciferin (DUF506)                                                                                                                                                                                                                                                                                                                                                                                                                                                       | protein_coding | -   |
| Purple    | AT3G08970 | <i>THERMOSENSITIVE MALE STERILE 1 (TMS1); (ATERDJ3A)</i>                  | J domain protein localized in ER lumen. Can compensate for the growth defect in <i>jem1 scj1</i> mutant yeast. Also shows similarity to HSP40 proteins and is induced by heat stress. At high temperatures, mutant alleles are not transmitted through the pollen due to defects in pollen tube growth.                                                                                                                                                                   | protein_coding | -   |
| Purple    | AT4G01270 | <i>AT4G01270</i>                                                          | RING/U-box superfamily protein                                                                                                                                                                                                                                                                                                                                                                                                                                            | protein_coding | C3H |
| Purple    | AT4G12650 | <i>AT4G12650</i>                                                          | Endomembrane protein 70 protein family                                                                                                                                                                                                                                                                                                                                                                                                                                    | protein_coding | -   |
| Purple    | AT5G59910 | <i>HISTONE H2B.11 (HTB4)</i>                                              | Histone superfamily protein                                                                                                                                                                                                                                                                                                                                                                                                                                               | protein_coding | -   |
| Purple    | AT5G65350 | <i>HISTONE 3 11 (HTR11)</i>                                               | histone 3 11                                                                                                                                                                                                                                                                                                                                                                                                                                                              | protein_coding | -   |
| Purple    | AT5G65610 | <i>AT5G65610</i>                                                          | hypothetical protein                                                                                                                                                                                                                                                                                                                                                                                                                                                      | protein_coding | -   |
| Red       | AT1G60800 | <i>NSP-INTERACTING KINASE 3 (NIK3)</i>                                    | Encodes one of a group of LRR-RLKs, designated as CLAVATA3 INSENSITIVE RECEPTOR KINASES (CIKs), that act as co-receptors and have essential roles in regulating CLV3-mediated stem cell homeostasis.                                                                                                                                                                                                                                                                      | protein_coding | -   |
| Red       | AT1G67230 | <i>LITTLE NUCLEI1 (LINC1)</i>                                             | Encodes a nuclear coiled-coil protein that is involved in the determination of plant nuclear structure. Member of a small gene family in Arabidopsis containing 4 proteins (LNC1-4 or CRWN 1-4) with redundant functions in protection from oxidative damage, control of nuclear morphology and degradation of ABI5.                                                                                                                                                      | protein_coding | -   |
| Red       | AT1G79110 | <i>BOI-RELATED GENE 2 (BRG2)</i>                                          | Encodes one of the BRGs (BOI-related gene) involved in resistance to Botrytis cinerea.                                                                                                                                                                                                                                                                                                                                                                                    | protein_coding | -   |
| Red       | AT2G29890 | <i>VILLIN 1 (VLN1)</i>                                                    | Encodes a ubiquitously expressed villin-like protein, whose mRNA may be alternatively processed. Villin belongs to a superfamily of actin binding proteins called the villin/gelsolin family. VLN1 protein co-localizes with actin filaments in several assays. VLN1 binds and bundles F-actin in a calcium-independent manner. It does not nucleate, cap or sever actin filaments and it stabilizes actin filaments, protecting them from ADF-mediated depolymerization. | protein_coding | -   |
| Red       | AT2G47490 | <i>NAD+ TRANSPORTER 1 (NDT1)</i>                                          | Encodes a chloroplast-localized NAD <sup>+</sup> transporter that transports NAD <sup>+</sup> in a counter exchange mode with ADP and AMP in vitro.                                                                                                                                                                                                                                                                                                                       | protein_coding | -   |
| Red       | AT3G51480 | <i>GLUTAMATE RECEPTOR 3.6 (GLR3.6)</i>                                    | member of Putative ligand-gated ion channel subunit family                                                                                                                                                                                                                                                                                                                                                                                                                | protein_coding | -   |
| Red       | AT4G01330 | <i>AT4G01330</i>                                                          | Protein kinase superfamily protein                                                                                                                                                                                                                                                                                                                                                                                                                                        | protein_coding | -   |
| Red       | AT4G23980 | <i>AUXIN RESPONSE FACTOR 9 (ARF9)</i>                                     | Encodes auxin response factor 9 (ARF9)                                                                                                                                                                                                                                                                                                                                                                                                                                    | protein_coding | ARF |
| Red       | AT4G39710 | <i>PHOTOSYNTHETIC NDH SUBCOMPLEX L 4 (PnsL4)</i>                          | FK506-binding protein 16-2                                                                                                                                                                                                                                                                                                                                                                                                                                                | protein_coding | -   |
| Red       | AT5G27420 | <i>CARBON/NITROGEN INSENSITIVE 1 (CNI1)</i>                               | Encodes CNI1 (Carbon/Nitrogen Insensitive1) (also named as ATL31), a RING type ubiquitin ligase that functions in the Carbon/Nitrogen response for growth phase transition in Arabidopsis seedlings.                                                                                                                                                                                                                                                                      | protein_coding | -   |
| Royalblue | AT1G09510 | <i>AT1G09510</i>                                                          | similar to Eucalyptus gunnii alcohol dehydrogenase of unknown physiological function                                                                                                                                                                                                                                                                                                                                                                                      | protein_coding | -   |
| Royalblue | AT1G69240 | <i>METHYL ESTERASE 15 (MES15)</i>                                         | Encodes a protein predicted to act as a carboxylesterase. It has similarity to the SABP2 methyl salicylate esterase from tobacco but no enzymatic activity has been identified for this protein.                                                                                                                                                                                                                                                                          | protein_coding | -   |
| Royalblue | AT2G33790 | <i>ARABINOGALACTAN PROTEIN 30 (AGP30)</i>                                 | Pistil-specific extensin-like protein precursor; Pollen proteins Ole e I family                                                                                                                                                                                                                                                                                                                                                                                           | protein_coding | -   |
| Royalblue | AT2G35460 | <i>AT2G35460</i>                                                          | Late embryogenesis abundant (LEA) hydroxyproline-rich glycoprotein family                                                                                                                                                                                                                                                                                                                                                                                                 | protein_coding | -   |
| Royalblue | AT2G42250 | <i>CYTOCHROME P450, FAMILY 712, SUBFAMILY A, POLYPEPTIDE 1 (CYP712A1)</i> | member of CYP712A                                                                                                                                                                                                                                                                                                                                                                                                                                                         | protein_coding | -   |
| Royalblue | AT2G42670 | <i>PLANT CYSTEINE OXIDASE 4 (PCO4)</i>                                    | Involved in controlling the stability of Group VII ethylene response factors (ERF-VIIs) via N-Arg/degren pathway through catalyzing the oxidation of their N-Cys for subsequent Arginyl-tRNA--protein transferase 1 (ATE1) mediated arginine installation.                                                                                                                                                                                                                | protein_coding | -   |
| Royalblue | AT3G25950 | <i>AT3G25950</i>                                                          | TRAM, LAG1 and CLN8 (TLC) lipid-sensing domain containing protein                                                                                                                                                                                                                                                                                                                                                                                                         | protein_coding | -   |
| Royalblue | AT3G42830 | <i>AT3G42830</i>                                                          | RING/U-box superfamily protein                                                                                                                                                                                                                                                                                                                                                                                                                                            | protein_coding | -   |

|           |           |                                                                         |                                                                                                                                                                                                                                                                                                                                                                                                                                                                                                        |                           |     |   |
|-----------|-----------|-------------------------------------------------------------------------|--------------------------------------------------------------------------------------------------------------------------------------------------------------------------------------------------------------------------------------------------------------------------------------------------------------------------------------------------------------------------------------------------------------------------------------------------------------------------------------------------------|---------------------------|-----|---|
| Royalblue | AT4G28900 | <i>AT4G28900</i>                                                        | transposable_element_gene; copia-like retrotransposon family                                                                                                                                                                                                                                                                                                                                                                                                                                           | transposable_element_gene | -   |   |
| Royalblue | AT5G39360 | <i>EID1-LIKE 2 (EDL2)</i>                                               | EID1-like 2                                                                                                                                                                                                                                                                                                                                                                                                                                                                                            | protein_coding            | -   |   |
| Salmon    | AT1G19120 | <i>SM-LIKE 1A (LSM1A)</i>                                               | Small nuclear ribonucleoprotein family protein                                                                                                                                                                                                                                                                                                                                                                                                                                                         | protein_coding            | -   |   |
| Salmon    | AT1G60190 | <i>PLANT U-BOX 19 (PUB19)</i>                                           | Encodes PUB19, a plant U-box armadillo repeat protein. Involved in salt inhibition of germination together with PUB18.                                                                                                                                                                                                                                                                                                                                                                                 | protein_coding            | -   | ✓ |
| Salmon    | AT1G75630 | <i>VACUOLAR H+-PUMPING ATPASE 16 KDA PROTEOLIPID SUBUNIT 4 (AVA-P4)</i> | Vacuolar H <sup>+</sup> -pumping ATPase 16 kD proteolipid (ava-p) mRNA                                                                                                                                                                                                                                                                                                                                                                                                                                 | protein_coding            | -   |   |
| Salmon    | AT2G04500 | <i>AT2G04500</i>                                                        | Cysteine/Histidine-rich C1 domain family protein                                                                                                                                                                                                                                                                                                                                                                                                                                                       | protein_coding            | -   |   |
| Salmon    | AT2G28890 | <i>POLTERGEIST LIKE 4 (PLL4)</i>                                        | Encodes a protein phosphatase 2C like gene, similar to POL. Involved in leaf development. Knockout mutants have abnormally shaped leaves.                                                                                                                                                                                                                                                                                                                                                              | protein_coding            | -   |   |
| Salmon    | AT2G39980 | <i>AT2G39980</i>                                                        | HXXXD-type acyl-transferase family protein                                                                                                                                                                                                                                                                                                                                                                                                                                                             | protein_coding            | -   | ✓ |
| Salmon    | AT2G46150 | <i>AT2G46150</i>                                                        | Late embryogenesis abundant (LEA) hydroxyproline-rich glycoprotein family                                                                                                                                                                                                                                                                                                                                                                                                                              | protein_coding            | -   | ✓ |
| Salmon    | AT3G62100 | <i>INDOLE-3-ACETIC ACID INDUCIBLE 30 (IAA30)</i>                        | Encodes a member of the Aux/IAA family of proteins implicated in auxin signaling. IAA30 lacks the conserved degron (domain II) found in many family members. IAA30 transcripts are induced by auxin treatment and accumulate preferentially in the quiescent center cells of the root meristem. Overexpression of IAA30 leads to defects in gravitropism, root development, root meristem maintenance, and cotyledon vascular development. Target of LEC2 and AGL15. Promotes somatytic embryogenesis. | protein_coding            | -   | ✓ |
| Salmon    | AT4G23060 | <i>IQ-DOMAIN 22 (IQD22)</i>                                             | Member of IQ67 (CaM binding) domain containing family.                                                                                                                                                                                                                                                                                                                                                                                                                                                 | protein_coding            | -   | ✓ |
| Salmon    | AT4G26470 | <i>AT4G26470</i>                                                        | Calcium-binding EF-hand family protein                                                                                                                                                                                                                                                                                                                                                                                                                                                                 | protein_coding            | -   | ✓ |
| Tan       | AT2G01910 | <i>AT2G01910 (ATMAP65-6)</i>                                            | Binds microtubules. Induces a crisscross mesh of microtubules, not bundles. Not involved in microtubule polymerization nor nucleation. Localizes to mitochondria.                                                                                                                                                                                                                                                                                                                                      | protein_coding            | -   |   |
| Tan       | AT2G22990 | <i>SINAPOYLGLUCOSE 1 (SNG1)</i>                                         | sinapoylglucose:malate sinapoyltransferase. Catalyzes the formation of sinapoylmalate from sinapoylglucose. Mutants accumulate excess sinapoylglucose.                                                                                                                                                                                                                                                                                                                                                 | protein_coding            | -   | ✓ |
| Tan       | AT3G06390 | <i>CASP-LIKE PROTEIN 1D2 (CASPL1D2)</i>                                 | Uncharacterized protein family (UPF0497)                                                                                                                                                                                                                                                                                                                                                                                                                                                               | protein_coding            | -   |   |
| Tan       | AT3G07970 | <i>QUARTET 2 (QRT2)</i>                                                 | Required for pollen separation during normal development. In <i>qrr</i> mutants, the outer walls of the four meiotic products of the pollen mother cell are fused, and pollen grains are released in tetrads. May be required for cell type-specific pectin degradation.                                                                                                                                                                                                                               | protein_coding            | -   |   |
| Tan       | AT4G09760 | <i>CHOLINE/ETHANOLAMINE KINASE 3 (CEK3)</i>                             | encodes a choline synthase whose gene expression is induced by high salt and mannitol.                                                                                                                                                                                                                                                                                                                                                                                                                 | protein_coding            | -   |   |
| Tan       | AT4G21865 | <i>AT4G21865</i>                                                        | hypothetical protein                                                                                                                                                                                                                                                                                                                                                                                                                                                                                   | protein_coding            | -   |   |
| Tan       | AT4G24890 | <i>PURPLE ACID PHOSPHATASE 24 (PAP24)</i>                               | purple acid phosphatase 24                                                                                                                                                                                                                                                                                                                                                                                                                                                                             | protein_coding            | -   |   |
| Tan       | AT5G07680 | <i>NAC DOMAIN CONTAINING PROTEIN 80 (NAC080)</i>                        | NAC domain containing protein 80                                                                                                                                                                                                                                                                                                                                                                                                                                                                       | protein_coding            | NAC |   |
| Tan       | AT5G54020 | <i>AT5G54020</i>                                                        | Cysteine/Histidine-rich C1 domain family protein                                                                                                                                                                                                                                                                                                                                                                                                                                                       | protein_coding            | -   |   |
| Tan       | AT5G54855 | <i>AT5G54855</i>                                                        | Pollen Ole e 1 allergen and extensin family protein                                                                                                                                                                                                                                                                                                                                                                                                                                                    | protein_coding            | -   |   |
| Turquoise | AT1G27120 | <i>AT1G27120 (GALT4)</i>                                                | Encodes a Golgi-localized hydroxyproline-O-galactosyltransferase.                                                                                                                                                                                                                                                                                                                                                                                                                                      | protein_coding            | -   | ✓ |
| Turquoise | AT2G22000 | <i>ELICITOR PEPTIDE 6 PRECURSOR (PROPEP6)</i>                           | elicitor peptide 6 precursor                                                                                                                                                                                                                                                                                                                                                                                                                                                                           | protein_coding            | -   | ✓ |
| Turquoise | AT3G15190 | <i>PLASTID RIBOSOMAL PROTEIN S20 (PRPS20)</i>                           | chloroplast 30S ribosomal protein S20                                                                                                                                                                                                                                                                                                                                                                                                                                                                  | protein_coding            | -   | ✓ |
| Turquoise | AT3G26060 | <i>PEROXIREDOXIN Q (PRXQ)</i>                                           | encodes periredoxin Q which decomposes peroxides and plays a role in the protection of the photosynthetic apparatus                                                                                                                                                                                                                                                                                                                                                                                    | protein_coding            | -   | ✓ |
| Turquoise | AT3G50685 | <i>AT3G50685</i>                                                        | anti-muellerian hormone type-2 receptor                                                                                                                                                                                                                                                                                                                                                                                                                                                                | protein_coding            | -   | ✓ |
| Turquoise | AT4G01050 | <i>THYLAKOID RHODANESE-LIKE (TROL)</i>                                  | hydroxyproline-rich glycoprotein family protein, contains a rhodanese homology domain. Required for anchoring the FNR flavoenzyme to the thylakoid membranes and sustaining high efficiency photosynthetic linear electron flow.                                                                                                                                                                                                                                                                       | protein_coding            | -   | ✓ |
| Turquoise | AT4G33666 | <i>AT4G33666</i>                                                        | hypothetical protein                                                                                                                                                                                                                                                                                                                                                                                                                                                                                   | protein_coding            | -   | ✓ |
| Turquoise | AT5G36160 | <i>TYR AMINOTRANSFERASE 2 (TAT2)</i>                                    | Encodes a cytosolic L-tyrosine aminotransferase. AtTAT2 exhibits much broader amino donor specificity than AtTAT1 and can use not only Tyr but also Phe, Trp, His, Met, Leu, Ala, Ser, Cys, Asp, Asn, Gln, and Arg as amino donors.                                                                                                                                                                                                                                                                    | protein_coding            | -   | ✓ |
| Turquoise | AT5G44630 | <i>AT5G44630</i>                                                        | Encodes a sesquiterpene synthase involved in generating all of the group B sesquiterpenes found in the Arabidopsis floral volatile blend. Strongly expressed in intrafloral nectaries.                                                                                                                                                                                                                                                                                                                 | protein_coding            | -   | ✓ |
| Turquoise | AT5G49820 | <i>ROOT UV-B SENSITIVE 6 (RUS6)</i>                                     | root UVB sensitive protein (Protein of unknown function, DUF647)                                                                                                                                                                                                                                                                                                                                                                                                                                       | protein_coding            | -   | ✓ |
| Yellow    | AT1G62800 | <i>ASPARTATE AMINOTRANSFERASE 4 (ASP4)</i>                              | Encodes aspartate aminotransferase (Asp4).                                                                                                                                                                                                                                                                                                                                                                                                                                                             | protein_coding            | -   |   |
| Yellow    | AT1G65960 | <i>GLUTAMATE DECARBOXYLASE 2 (GAD2)</i>                                 | glutamate decarboxylase (GAD2)                                                                                                                                                                                                                                                                                                                                                                                                                                                                         | protein_coding            | -   |   |



|        |           |                                                 |                                                                                                                                                                                                                                                    |                |   |   |
|--------|-----------|-------------------------------------------------|----------------------------------------------------------------------------------------------------------------------------------------------------------------------------------------------------------------------------------------------------|----------------|---|---|
| Yellow | AT2G01520 | <i>MLP-LIKE PROTEIN 328 (MLP328)</i>            | Encodes a cis-cinnamic acid responsive gene that is a member of the major latex protein-like gene family and plays a role in promoting vegetative growth and delaying flowering                                                                    | protein_coding | - |   |
| Yellow | AT2G22550 | <i>AT2G22550</i>                                | Unknown protein                                                                                                                                                                                                                                    | protein_coding | - | ✓ |
| Yellow | AT2G30540 | <i>AT2G30540</i>                                | Encodes a member of the CC-type glutaredoxin (ROXY) family that has been shown to interact with the transcription factor TGA2.                                                                                                                     | protein_coding | - |   |
| Yellow | AT2G43100 | <i>ISOPROPYLMALATE ISOMERASE 2 (IPMI2)</i>      | Small subunit, which together with IPMI SSU2, IPMI SSU3 and IPMI LSU1, is a member of heterodimeric isopropylmalate isomerase (IPMI). Together with IPMI SSU3 participates in the Met chain elongation pathway.                                    | protein_coding | - |   |
| Yellow | AT3G26520 | <i>TONOPLAST INTRINSIC PROTEIN 2 (TIP2)</i>     | gamma tonoplast intrinsic protein 2 (TIP2), expressed throughout the plant and transcript level is increased upon NaCl or ABA treatments. NaCl stress-sensitive yeast mutant strains exhibit more resistance to salt when expressing this protein. | protein_coding | - | ✓ |
| Yellow | AT3G27650 | <i>LOB DOMAIN-CONTAINING PROTEIN 25 (LBD25)</i> | LOB domain-containing protein 25                                                                                                                                                                                                                   | protein_coding | - |   |
| Yellow | AT4G22212 | <i>AT4G22212</i>                                | Encodes a defensin-like (DEFL) family protein.                                                                                                                                                                                                     | protein_coding | - |   |
| Yellow | AT5G23840 | <i>AT5G23840</i>                                | MD-2-related lipid recognition domain-containing protein                                                                                                                                                                                           | protein_coding | - |   |
