# Supplementary material for: Weighted Gene Correlation Network Analysis (WGCNA) of Arabidopsis Somatic Embryogenesis (SE) and Identification of Key Gene Modules to Uncover SE-Associated Hub Genes
Source: Hindawi journal article supplement (doi:10.1155/2022/7471063), 2022-07-04
Supplement: f4 [file 7471063.f4.pdf]

**Table S4. Important hub genes based on differential gene expression analysis.**

| Gene identifier | Gene symbol                                             | DEGs ( $ \log_2 FC  \geq 2.0$ and $p$ -value $< 0.05$ ) | DEGs - Wickramasuriya & Dunwell ( $ \log_2 FC  \geq 2.0$ and $p$ -value $< 0.05$ ) | Expression in SE tissues compared to leaf tissue | Arabidopsis eFP browser                   | Gene description                                                                                                                                                                                                                                                                                                                                                                                                                                                          |
|-----------------|---------------------------------------------------------|---------------------------------------------------------|------------------------------------------------------------------------------------|--------------------------------------------------|-------------------------------------------|---------------------------------------------------------------------------------------------------------------------------------------------------------------------------------------------------------------------------------------------------------------------------------------------------------------------------------------------------------------------------------------------------------------------------------------------------------------------------|
| AT1G06040       | <i>SALT TOLERANCE (STO)</i>                             |                                                         | ✓                                                                                  | Down-regulated                                   |                                           | Encodes salt tolerance protein (STO) which confers salt tolerance to yeast cells.                                                                                                                                                                                                                                                                                                                                                                                         |
| AT1G16330       | <i>CYCLIN B3;1 (CYCB3;1)</i>                            |                                                         | ✓                                                                                  | Up-regulated                                     |                                           | core cell cycle genes                                                                                                                                                                                                                                                                                                                                                                                                                                                     |
| AT1G19540*      | <i>AT1G19540</i>                                        | ✓                                                       | ✓                                                                                  | Up-regulated                                     | High and specific to the embryonic stages | NmrA-like negative transcriptional regulator family protein                                                                                                                                                                                                                                                                                                                                                                                                               |
| AT1G27120*      | <i>AT1G27120 (GALT4)</i>                                | ✓                                                       |                                                                                    | -                                                |                                           | Encodes a Golgi-localized hydroxyproline-O-galactosyltransferase.                                                                                                                                                                                                                                                                                                                                                                                                         |
| AT1G27930*      | <i>AT1G27930 (AGM1)</i>                                 |                                                         | ✓                                                                                  | Down-regulated                                   |                                           | Arabinogalactan methyltransferase, involved in arabinogalactan glucuronic acid methylation. Interacts with eIF3.                                                                                                                                                                                                                                                                                                                                                          |
| AT1G28600       | <i>GUARD-CELL-ENRICHED GDSL LIPASE 2 (GGL2)</i>         |                                                         | ✓                                                                                  | Down-regulated                                   |                                           | GDSL-motif esterase/acyltransferase/lipase. Enzyme group with broad substrate specificity that may catalyze acyltransfer or hydrolase reactions with lipid and non-lipid substrates.                                                                                                                                                                                                                                                                                      |
| AT1G30600*      | <i>AT1G30600</i>                                        |                                                         | ✓                                                                                  | Up-regulated                                     |                                           | Subtilase family protein                                                                                                                                                                                                                                                                                                                                                                                                                                                  |
| AT1G57990       | <i>PURINE PERMEASE 18 (PUP18)</i>                       | ✓                                                       |                                                                                    | -                                                |                                           | Member of a family of proteins related to PUP1, a purine transporter. May be involved in the transport of purine and purine derivatives such as cytokinins, across the plasma membrane.                                                                                                                                                                                                                                                                                   |
| AT1G60190       | <i>PLANT U-BOX 19 (PUB19)</i>                           | ✓                                                       |                                                                                    | -                                                |                                           | Encodes PUB19, a plant U-box armadillo repeat protein. Involved in salt inhibition of germination together with PUB18.                                                                                                                                                                                                                                                                                                                                                    |
| AT1G62520*      | <i>AT1G62520</i>                                        |                                                         | ✓                                                                                  | Up-regulated                                     |                                           | sulfated surface-like glycoprotein                                                                                                                                                                                                                                                                                                                                                                                                                                        |
| AT1G65870*      | <i>AT1G65870</i>                                        |                                                         | ✓                                                                                  | Down-regulated                                   |                                           | Disease resistance-responsive (dirigent-like protein) family protein                                                                                                                                                                                                                                                                                                                                                                                                      |
| AT1G65960       | <i>GLUTAMATE DECARBOXYLASE 2 (GAD2)</i>                 |                                                         | ✓                                                                                  | Down-regulated                                   |                                           | glutamate decarboxylase (GAD2)                                                                                                                                                                                                                                                                                                                                                                                                                                            |
| AT1G67080       | <i>ABSCISIC ACID (ABA)-DEFICIENT 4 (ABA4)</i>           |                                                         | ✓                                                                                  | Down-regulated                                   |                                           | Encodes a protein involved in the photoprotection of PSII. An aba4-1 mutant completely lacks neoxanthin, a component of the chromophore of the peripheral antenna system in PSII. ABA4 is required for neoxanthin biosynthesis, an intermediary step in abscisic acid biosynthesis, but no catalytic activity has been detected for the ABA4 protein.                                                                                                                     |
| AT1G69240       | <i>METHYL ESTERASE 15 (MES15)</i>                       |                                                         | ✓                                                                                  | Up-regulated                                     |                                           | Encodes a protein predicted to act as a carboxylesterase. It has similarity to the SABP2 methyl salicylate esterase from tobacco but no enzymatic activity has been identified for this protein.                                                                                                                                                                                                                                                                          |
| AT1G79110       | <i>BOI-RELATED GENE 2 (BRG2)</i>                        | ✓                                                       |                                                                                    | -                                                |                                           | Encodes one of the BRGs (BOI-related gene) involved in resistance to Botrytis cinerea.                                                                                                                                                                                                                                                                                                                                                                                    |
| AT2G04500*      | <i>AT2G04500</i>                                        |                                                         | ✓                                                                                  | Up-regulated                                     |                                           | Cysteine/Histidine-rich C1 domain family protein                                                                                                                                                                                                                                                                                                                                                                                                                          |
| AT2G15400*      | <i>AT2G15400 (NRPE3B)</i>                               |                                                         | ✓                                                                                  | Up-regulated                                     |                                           | Non-catalytic subunit of Nuclear DNA-dependent RNA polymerase V; homologous to budding yeast RPB3 and the E. coli RNA polymerase alpha subunit.                                                                                                                                                                                                                                                                                                                           |
| AT2G21820*      | <i>AT2G21820</i>                                        |                                                         | ✓                                                                                  | Up-regulated                                     | High and specific to the embryonic stages | seed maturation protein                                                                                                                                                                                                                                                                                                                                                                                                                                                   |
| AT2G22000       | <i>ELICITOR PEPTIDE 6 PRECURSOR (PROPEP6)</i>           | ✓                                                       | ✓                                                                                  | Down-regulated                                   |                                           | elicitor peptide 6 precursor                                                                                                                                                                                                                                                                                                                                                                                                                                              |
| AT2G22550*      | <i>AT2G22550 (SVP)/AT2G22540</i>                        | ✓                                                       | ✓                                                                                  | Down-regulated                                   |                                           | Encodes a nuclear protein that acts as a floral repressor and functions within the thermosensory pathway                                                                                                                                                                                                                                                                                                                                                                  |
| AT2G22990       | <i>SINAPOYLGLUCOSE 1 (SNG1)</i>                         | ✓                                                       | ✓                                                                                  | Down-regulated                                   |                                           | sinapoylglucose:malate sinapoyltransferase. Catalyzes the formation of sinapoylmalate from sinapoylglucose. Mutants accumulate excess sinapoylglucose.                                                                                                                                                                                                                                                                                                                    |
| AT2G23530*      | <i>AT2G23530</i>                                        |                                                         | ✓                                                                                  | Up-regulated                                     |                                           | Zinc-finger domain of monoamine-oxidase A repressor R1                                                                                                                                                                                                                                                                                                                                                                                                                    |
| AT2G24970*      | <i>AT2G24970</i>                                        |                                                         | ✓                                                                                  | Up-regulated                                     |                                           | spindle/kinetochore-associated protein                                                                                                                                                                                                                                                                                                                                                                                                                                    |
| AT2G29300*      | <i>AT2G29300</i>                                        |                                                         | ✓                                                                                  | Down-regulated                                   | High and specific to the embryonic stages | NAD(P)-binding Rossmann-fold superfamily protein                                                                                                                                                                                                                                                                                                                                                                                                                          |
| AT2G29890       | <i>VILLIN 1 (VLN1)</i>                                  | ✓                                                       |                                                                                    | -                                                |                                           | Encodes a ubiquitously expressed villin-like protein, whose mRNA may be alternatively processed. Villin belongs to a superfamily of actin binding proteins called the villin/gelsolin family. VLN1 protein co-localizes with actin filaments in several assays. VLN1 binds and bundles F-actin in a calcium-independent manner. It does not nucleate, cap or sever actin filaments and it stabilizes actin filaments, protecting them from ADF-mediated depolymerization. |
| AT2G30540*      | <i>AT2G30540 (ROXY7)</i>                                |                                                         | ✓                                                                                  | Down-regulated                                   |                                           | Encodes a member of the CC-type glutaredoxin (ROXY) family that has been shown to interact with the transcription factor TGA2.                                                                                                                                                                                                                                                                                                                                            |
| AT2G32280       | <i>VASCULATURE COMPLEXITY AND CONNECTIVITY (VCC)</i>    |                                                         | ✓                                                                                  | Up-regulated                                     |                                           | Encodes a member of a plant-specific gene family that is required for embryo provasculature development. The gene product regulates vascular network complexity and connectivity in cotyledons.                                                                                                                                                                                                                                                                           |
| AT2G32540       | <i>CELLULOSE SYNTHASE-LIKE B4 (CSLB04)</i>              |                                                         | ✓                                                                                  | Down-regulated                                   |                                           | encodes a gene similar to cellulose synthase                                                                                                                                                                                                                                                                                                                                                                                                                              |
| AT2G33520       | <i>CYSTEINE-RICH TRANSMEMBRANE MODULE 7 (ATHCYSTM7)</i> |                                                         | ✓                                                                                  | Up-regulated                                     | High and specific to the embryonic stages | cysteine-rich/transmembrane domain protein A                                                                                                                                                                                                                                                                                                                                                                                                                              |

|            |                                                                           |   |   |                |                                           |                                                                                                                                                                                                                                                                                                                                                                                                                                                                                                        |
|------------|---------------------------------------------------------------------------|---|---|----------------|-------------------------------------------|--------------------------------------------------------------------------------------------------------------------------------------------------------------------------------------------------------------------------------------------------------------------------------------------------------------------------------------------------------------------------------------------------------------------------------------------------------------------------------------------------------|
| AT2G38900* | <i>AT2G38900</i>                                                          |   | ✓ | Up-regulated   | High and specific to the embryonic stages | Predicted to encode a PR (pathogenesis-related) peptide that belongs to the PR-6 proteinase inhibitor family. Six putative PR-6-type protein encoding genes are found in Arabidopsis: At2g38900, At2g38870, At5g43570, At5g43580, At3g50020 and At3g46860.                                                                                                                                                                                                                                             |
| AT2G39980* | <i>AT2G39980</i>                                                          | ✓ |   | -              |                                           | HXXXD-type acyl-transferase family protein                                                                                                                                                                                                                                                                                                                                                                                                                                                             |
| AT2G40420* | <i>AT2G40420</i>                                                          |   | ✓ | Down-regulated |                                           | Encodes a putative amino acid transporter.                                                                                                                                                                                                                                                                                                                                                                                                                                                             |
| AT2G43100  | <i>ISOPROPYLMALATE ISOMERASE 2 (IPMI2)</i>                                |   | ✓ | Down-regulated |                                           | Small subunit, which together with IPMI SSU2, IPMI SSU3 and IPMI LSU1, is a member of heterodimeric isopropylmalate isomerase (IPMI). Together with IPMI SSU3 participates in the Met chain elongation pathway.                                                                                                                                                                                                                                                                                        |
| AT2G45600* | <i>AT2G45600</i>                                                          |   | ✓ | Down-regulated |                                           | alpha/beta-Hydrolases superfamily protein                                                                                                                                                                                                                                                                                                                                                                                                                                                              |
| AT2G46150* | <i>AT2G46150</i>                                                          | ✓ |   | -              |                                           | Late embryogenesis abundant (LEA) hydroxyproline-rich glycoprotein family                                                                                                                                                                                                                                                                                                                                                                                                                              |
| AT3G14060* | <i>AT3G14060</i>                                                          | ✓ |   | -              |                                           | hypothetical protein                                                                                                                                                                                                                                                                                                                                                                                                                                                                                   |
| AT3G15190  | <i>PLASTID RIBOSOMAL PROTEIN S20 (PRPS20)</i>                             |   | ✓ | Down-regulated |                                           | chloroplast 30S ribosomal protein S20                                                                                                                                                                                                                                                                                                                                                                                                                                                                  |
| AT3G25950* | <i>AT3G25950</i>                                                          |   | ✓ | Down-regulated |                                           | TRAM, LAG1 and CLN8 (TLC) lipid-sensing domain containing protein                                                                                                                                                                                                                                                                                                                                                                                                                                      |
| AT3G26060  | <i>PEROXIREDOXIN Q (PRXQ)</i>                                             | ✓ | ✓ | Down-regulated |                                           | encodes periredoxin Q which decomposes peroxides and plays a role in the protection of the photosynthetic apparatus                                                                                                                                                                                                                                                                                                                                                                                    |
| AT3G26330  | <i>CYTOCHROME P450, FAMILY 71, SUBFAMILY B, POLYPEPTIDE 37 (CYP71B37)</i> |   | ✓ | Up-regulated   |                                           | putative cytochrome P450                                                                                                                                                                                                                                                                                                                                                                                                                                                                               |
| AT3G26520  | <i>TONOPLAST INTRINSIC PROTEIN 2 (TIP2)</i>                               | ✓ | ✓ | Down-regulated |                                           | gamma tonoplast intrinsic protein 2 (TIP2). expressed throughout the plant and transcript level is increased upon NaCl or ABA treatments. NaCl stress-sensitive yeast mutant strains exhibit more resistance to salt when expressing this protein.                                                                                                                                                                                                                                                     |
| AT3G27650  | <i>LOB DOMAIN-CONTAINING PROTEIN 25 (LBD25)</i>                           |   | ✓ | Down-regulated |                                           | LOB domain-containing protein 25                                                                                                                                                                                                                                                                                                                                                                                                                                                                       |
| AT3G50685* | <i>AT3G50685</i>                                                          | ✓ | ✓ | Down-regulated |                                           | anti-muellerian hormone type-2 receptor                                                                                                                                                                                                                                                                                                                                                                                                                                                                |
| AT3G53180  | <i>NODULIN/GLUTAMINE SYNTHASE-LIKE PROTEIN (NodGS)</i>                    | ✓ |   | -              |                                           | Encodes a protein that is the product of a fusion gene with a C-terminal GSI like sequence and an N-terminal part sharing homology with nodulins. It self-assembles into oligomers and its expression is increased in response to flagellin treatment.                                                                                                                                                                                                                                                 |
| AT3G53980* | <i>AT3G53980</i>                                                          |   | ✓ | Down-regulated |                                           | Bifunctional inhibitor/lipid-transfer protein/seed storage 2S albumin superfamily protein                                                                                                                                                                                                                                                                                                                                                                                                              |
| AT3G56980  | <i>BASIC HELIX-LOOP-HELIX 39 (BHLH39)</i>                                 | ✓ |   | -              |                                           | Encodes a member of the basic helix-loop-helix transcription factor protein.                                                                                                                                                                                                                                                                                                                                                                                                                           |
| AT3G62100  | <i>INDOLE-3-ACETIC ACID INDUCIBLE 30 (IAA30)</i>                          | ✓ | ✓ | Up-regulated   |                                           | Encodes a member of the Aux/IAA family of proteins implicated in auxin signaling. IAA30 lacks the conserved degron (domain II) found in many family members. IAA30 transcripts are induced by auxin treatment and accumulate preferentially in the quiescent center cells of the root meristem. Overexpression of IAA30 leads to defects in gravitropism, root development, root meristem maintenance, and cotyledon vascular development. Target of LEC2 and AGL15. Promotes somatytic embryogenesis. |
| AT4G01050  | <i>THYLAKOID RHODANESSE-LIKE (TROL)</i>                                   | ✓ | ✓ | Down-regulated |                                           | hydroxyproline-rich glycoprotein family protein, contains a rhodanese homology domain. Required for anchoring the FNR flavoenzyme to the thylakoid membranes and sustaining high efficiency photosynthetic linear electron flow.                                                                                                                                                                                                                                                                       |
| AT4G01270* | <i>AT4G01270</i>                                                          |   | ✓ | Up-regulated   |                                           | RING/U-box superfamily protein                                                                                                                                                                                                                                                                                                                                                                                                                                                                         |
| AT4G01330* | <i>AT4G01330</i>                                                          |   | ✓ | Down-regulated |                                           | Protein kinase superfamily protein                                                                                                                                                                                                                                                                                                                                                                                                                                                                     |
| AT4G09760  | <i>CHOLINE/ETHANOLAMINE KINASE 3 (CEK3)</i>                               |   | ✓ | Down-regulated |                                           | encodes a choline synthase whose gene expression is induced by high salt and mannitol.                                                                                                                                                                                                                                                                                                                                                                                                                 |
| AT4G17695  | <i>KANADI 3 (KAN3)</i>                                                    | ✓ | ✓ | Down-regulated |                                           | Homeodomain-like superfamily protein                                                                                                                                                                                                                                                                                                                                                                                                                                                                   |
| AT4G20530* | <i>AT4G20530</i>                                                          |   | ✓ | Up-regulated   |                                           | cysteine-rich repeat secretory-like protein                                                                                                                                                                                                                                                                                                                                                                                                                                                            |
| AT4G22212* | <i>AT4G22212</i>                                                          |   | ✓ | Up-regulated   |                                           | Encodes a defensin-like (DEFL) family protein.                                                                                                                                                                                                                                                                                                                                                                                                                                                         |
| AT4G26370* | <i>AT4G26370</i>                                                          |   | ✓ | Down-regulated |                                           | antitermination NusB domain-containing protein                                                                                                                                                                                                                                                                                                                                                                                                                                                         |
| AT4G26470* | <i>AT4G26470</i>                                                          | ✓ | ✓ | Up-regulated   |                                           | Calcium-binding EF-hand family protein                                                                                                                                                                                                                                                                                                                                                                                                                                                                 |
| AT4G28310* | <i>AT4G28310</i>                                                          |   | ✓ | Up-regulated   |                                           | microtubule-associated protein                                                                                                                                                                                                                                                                                                                                                                                                                                                                         |
| AT4G30850  | <i>HEPTAHELICAL TRANSMEMBRANE PROTEIN2 (HHP2)</i>                         |   | ✓ | Up-regulated   |                                           | heptahelical transmembrane protein homologous to human adiponectin receptors and progesterin receptors                                                                                                                                                                                                                                                                                                                                                                                                 |
| AT4G33666* | <i>AT4G33666</i>                                                          | ✓ | ✓ | Down-regulated |                                           | hypothetical protein                                                                                                                                                                                                                                                                                                                                                                                                                                                                                   |
| AT4G39710  | <i>PHOTOSYNTHETIC NDH SUBCOMPLEX L 4 (PnsL4)</i>                          | ✓ | ✓ | Down-regulated |                                           | FK506-binding protein 16-2                                                                                                                                                                                                                                                                                                                                                                                                                                                                             |
| AT5G16010* | <i>AT5G16010</i>                                                          |   | ✓ | Down-regulated |                                           | 3-oxo-5-alpha-steroid 4-dehydrogenase family protein                                                                                                                                                                                                                                                                                                                                                                                                                                                   |
| AT5G16140* | <i>AT5G16140</i>                                                          |   | ✓ | Down-regulated |                                           | Peptidyl-tRNA hydrolase family protein                                                                                                                                                                                                                                                                                                                                                                                                                                                                 |
| AT5G27420  | <i>CARBON/NITROGEN INSENSITIVE 1 (CNI1)</i>                               |   | ✓ | Down-regulated |                                           | Encodes CNI1 (Carbon/Nitrogen Insensitive1) (also named as ATL31), a RING type ubiquitin ligase that functions in the Carbon/Nitrogen response for growth phase transition in Arabidopsis seedlings.                                                                                                                                                                                                                                                                                                   |
| AT5G27560* | <i>AT5G27560</i>                                                          |   | ✓ | Down-regulated |                                           | DUF1995 domain protein, putative (DUF1995)                                                                                                                                                                                                                                                                                                                                                                                                                                                             |
| AT5G36160  | <i>TYR AMINOTRANSFERASE 2 (TAT2)</i>                                      | ✓ | ✓ | Down-regulated |                                           | Encodes a cytosolic L-tyrosine aminotransferase. AtTAT2 exhibits much broader amino donor specificity than AtTAT1 and can use not only Tyr but also Phe, Trp, His, Met, Leu, Ala, Ser, Cys, Asp, Asn, Gln, and Arg as amino donors.                                                                                                                                                                                                                                                                    |

|            |                                                        |   |   |                |                                           |                                                                                                                                                                                                                                                                          |
|------------|--------------------------------------------------------|---|---|----------------|-------------------------------------------|--------------------------------------------------------------------------------------------------------------------------------------------------------------------------------------------------------------------------------------------------------------------------|
| AT5G43770* | <i>AT5G43770</i>                                       |   | ✓ | Up-regulated   | High and specific to the embryonic stages | proline-rich family protein                                                                                                                                                                                                                                              |
| AT5G44380* | <i>AT5G44380 (AtBBE24)</i>                             | ✓ | ✓ | Up-regulated   | High and specific to the embryonic stages | FAD-binding Berberine family protein                                                                                                                                                                                                                                     |
| AT5G44630* | <i>AT5G44630</i>                                       | ✓ |   | -              |                                           | Encodes a sesquiterpene synthase involved in generating all of the group B sesquiterpenes found in the Arabidopsis floral volatile blend. Strongly expressed in intrafloral nectaries.                                                                                   |
| AT5G49820  | <i>ROOT UV-B SENSITIVE 6 (RUS6)</i>                    | ✓ |   | -              |                                           | root UVB sensitive protein (Protein of unknown function, DUF647)                                                                                                                                                                                                         |
| AT5G50300  | <i>AZA-GUANINE RESISTANT2 (AZG2)</i>                   | ✓ |   | -              |                                           | Encodes a homolog of the adenine-guanine-hypoxanthine transporter <i>AzgA</i> of <i>Aspergillus nidulans</i> . Function as a plant adenine-guanine transporter. Two closely related genes exist in Arabidopsis: AT3G10960 ( <i>Azg1</i> ) and AT5G50300 ( <i>Azg2</i> ). |
| AT5G54540* | <i>AT5G54540</i>                                       |   | ✓ | Down-regulated |                                           | Uncharacterized conserved protein (UCP012943)                                                                                                                                                                                                                            |
| AT5G55200  | <i>MITOCHONDRIAL GRPE 1 (MGE1)</i>                     | ✓ |   | -              |                                           | Co-chaperone GrpE family protein                                                                                                                                                                                                                                         |
| AT5G59750  | <i>HOMOLOG OF RIBA 3 (RIBA3)</i>                       |   | ✓ | Down-regulated |                                           | monofunctional riboflavin biosynthesis protein RIBA 3                                                                                                                                                                                                                    |
| AT5G63990* | <i>AT5G63990</i>                                       | ✓ |   | -              |                                           | Inositol monophosphatase family protein                                                                                                                                                                                                                                  |
| AT5G65860* | <i>AT5G65860</i>                                       | ✓ |   | -              |                                           | ankyrin repeat family protein                                                                                                                                                                                                                                            |
| ATCG00420  | <i>NADH DEHYDROGENASE SUBUNIT J (NDHJ)</i>             |   | ✓ | Down-regulated |                                           | Encodes NADH dehydrogenase subunit J. Its transcription is increased upon sulfur depletion.                                                                                                                                                                              |
| ATCG00430  | <i>PHOTOSYSTEM II REACTION CENTER PROTEIN G (PSBG)</i> |   | ✓ | Down-regulated |                                           | Encodes a protein which was originally thought to be part of photosystem II but its wheat homolog was later shown to encode for subunit K of NADH dehydrogenase.                                                                                                         |
| ATCG00890* | <i>ATCG00890 (NDHB.1)</i>                              |   | ✓ | Down-regulated |                                           | NADH dehydrogenase ND2                                                                                                                                                                                                                                                   |

\* - uncharacterized genes
