# Supplementary material for: Weighted Gene Correlation Network Analysis (WGCNA) of Arabidopsis Somatic Embryogenesis (SE) and Identification of Key Gene Modules to Uncover SE-Associated Hub Genes
Source: Hindawi journal article supplement (doi:10.1155/2022/7471063), 2022-07-04
Supplement: f5 [file 7471063.f5.pdf]

Table S5. EMB genes in the co-expression network

| Module | Gene identifier | Gene Symbol    | Predicted protein function                                          | Additional comments on protein function                                                                       |
|--------|-----------------|----------------|---------------------------------------------------------------------|---------------------------------------------------------------------------------------------------------------|
| Black  | AT5G14850       | <i>APTG1</i>   | Mannosyltransferase                                                 | ER-localized; Biosynthesis of GPI anchors                                                                     |
| Black  | AT5G59340       | <i>WOX2</i>    | Homeodomain Protein                                                 | Transcriptional regulator                                                                                     |
| Black  | AT5G51020       | <i>CRL</i>     | Plastid Outer Envelope Membrane Protein                             | Required for plastid division                                                                                 |
| Black  | AT3G48930       | <i>EMB1080</i> | Ribosomal Protein S11                                               | Translation in cytosol                                                                                        |
| Black  | AT4G23940       | <i>FtsH1</i>   | Chloroplast AAA-ATPase; YcI2-FtsHi Complex Subunit                  | Required for chloroplast protein import                                                                       |
| Black  | AT4G12130       | <i>COG0354</i> | Mitochondrial Fe-S Cluster Biogenesis Protein                       | Folate dependent                                                                                              |
| Black  | AT3G04400       | <i>EMB2171</i> | Ribosomal Protein L17/L23                                           | Translation in mitochondria or cytosol                                                                        |
| Black  | AT1G49880       | <i>EMB3106</i> | Mitochondrial Sulfhydryl Oxidase                                    | Proposed to stabilize mitochondrial proteins by oxidative protein folding                                     |
| Black  | AT1G02780       | <i>EMB2386</i> | Ribosomal Protein L19                                               | Translation in cytosol                                                                                        |
| Black  | AT1G78580       | <i>TPS1</i>    | Trehalose-6-Phosphate Synthase 1                                    | Catalyzes first step in trehalose biosynthesis                                                                |
| Black  | AT2G03870       | <i>EMB2816</i> | Pre-mRNA Splicing Factor                                            | RNA processing and decay                                                                                      |
| Black  | AT2G18020       | <i>EMB2296</i> | Ribosomal Protein L8/L2                                             | Translation in mitochondria or cytosol                                                                        |
| Black  | AT2G34480       | <i>RPL18aB</i> | Ribosomal Protein                                                   | Translation in cytosol                                                                                        |
| Blue   | AT2G39770       | <i>CYT1</i>    | Mannose-1-Phosphate-Guanyltransferase; GDP-MannosePyrophosphorylase | GDP-mannose production; N-glycosylation; Vitamin C biosynthesis                                               |
| Blue   | AT2G47620       | <i>SWI3A</i>   | Subunit of SWI/SNF Chromatin Remodeling Complex                     | ATP-dependent chromatin remodeling; Transcriptional regulation                                                |
| Blue   | AT4G14590       | <i>EMB2739</i> | snRNA Processing Factor                                             | snRNA 3' end maturation; Pre-mRNA splicing                                                                    |
| Blue   | AT5G19820       | <i>EMB2734</i> | Karyopherin (Importin) Protein                                      | Import of proteins into nucleus; miRNA biogenesis                                                             |
| Blue   | AT5G20920       | <i>EMB1401</i> | Translation Initiation Factor                                       | Attachment of ribosome small subunit in translation                                                           |
| Blue   | AT4G36480       | <i>EMB2779</i> | Serine Palmitoyltransferase Subunit                                 | Catalyzes first step in sphingolipid biosynthesis                                                             |
| Blue   | AT4G36630       | <i>EMB2754</i> | Putative Vacuolar Protein (VPS39)                                   | Proposed role in vacuolar protein sorting                                                                     |
| Blue   | AT1G31860       | <i>HISN2</i>   | Histidine Biosynthetic Enzyme                                       | Catalyzes second step in histidine biosynthesis                                                               |
| Blue   | AT5G16750       | <i>TOZ</i>     | Uncertain                                                           | Nucleolar WD-40 repeat protein; Possible role in 18S rRNA biogenesis                                          |
| Blue   | AT5G27740       | <i>EMB2775</i> | DNA Replication Factor C Subunit                                    | DNA replication; PCNA clamp loading                                                                           |
| Blue   | AT5G27540       | <i>EMB2473</i> | Mitochondrial GTPase                                                | Regulation of mitochondrial trafficking and morphology                                                        |
| Blue   | AT5G26760       | <i>RIMA</i>    | Putative Role in Nuclear Import and Transcriptional Regulation      | Interacts with IYO transcriptional regulator                                                                  |
| Blue   | AT5G67570       | <i>EMB1408</i> | PPR Protein                                                         | RNA binding protein; Organellar gene function                                                                 |
| Blue   | AT5G66055       | <i>EMB2036</i> | Uncertain                                                           | Chloroplast-localized ankyrin repeat protein                                                                  |
| Blue   | AT5G63420       | <i>EMB2746</i> | Chloroplast Ribonuclease J                                          | Chloroplast RNA metabolism                                                                                    |
| Blue   | AT5G62990       | <i>EMB1692</i> | PORR Domain Protein                                                 | Putative role in organellar RNA splicing or metabolism                                                        |
| Blue   | AT5G60540       | <i>EMB2407</i> | Pyridoxine Glutaminase                                              | Pyroxidine (vitamin B6) biosynthesis                                                                          |
| Blue   | AT5G59440       | <i>ZEUS1</i>   | Thymidylate Kinase                                                  | Biosynthesis of dTDP; Regulation of replication                                                               |
| Blue   | AT5G58230       | <i>MSI1</i>    | Polycomb Repressive Complex Subunit                                 | Chromatin modification; Histone methylation                                                                   |
| Blue   | AT5G58020       | <i>RTF2</i>    | Replication Termination Factor Domain Protein                       | Pre-mRNA splicing                                                                                             |
| Blue   | AT5G55940       | <i>EMB2731</i> | Unknown                                                             | None                                                                                                          |
| Blue   | AT5G53400       | <i>BOB1</i>    | Non-Canonical Small Heat Shock Protein                              | Putative molecular chaperone                                                                                  |
| Blue   | AT5G49720       | <i>KOR</i>     | Endo-B-1,4-Glucanase; Glycosyl Hydrolase                            | Cellulose biosynthesis                                                                                        |
| Blue   | AT5G49010       | <i>EMB2812</i> | GIN5 Complex Subunit                                                | DNA replication                                                                                               |
| Blue   | AT5G48720       | <i>XRI1</i>    | Novel DNA Repair Factor                                             | Functions in meiosis; male gametophyte development                                                            |
| Blue   | AT5G48840       | <i>PTS</i>     | Pantothenate Synthetase                                             | Vitamin B5 biosynthesis; Coenzyme A function                                                                  |
| Blue   | AT5G42080       | <i>ADL1A</i>   | Dynamin-Like Protein                                                | Associated with cell plate; Similar to phragmoplastin; Proposed role in vesicular trafficking and cytokinesis |
| Blue   | AT5G37510       | <i>EMB1467</i> | Mitochondrial NADH Dehydrogenase Complex Subunit                    | Role in electron transport chain                                                                              |
| Blue   | AT5G23880       | <i>EMB1265</i> | Cleavage and Polyadenylation Specificity Factor                     | Location of poly(A) sites; Modulation of transcription termination                                            |
| Blue   | AT5G18580       | <i>FASS</i>    | Protein Phosphatase (PP2A Complex Subunit)                          | Preprophase band formation; Orientation of cell division                                                      |
| Blue   | AT5G17710       | <i>EMB1241</i> | Chloroplast GrpE Protein                                            | Interacts with Hsp70; Chloroplast protein maintenance                                                         |
| Blue   | AT5G13780       | <i>NAA10</i>   | N-Terminal Acetyltransferase, Catalytic Subunit                     | Protein modification                                                                                          |
| Blue   | AT5G13010       | <i>EMB3011</i> | RNA Helicase                                                        | Pre-mRNA splicing factor; miRNA biogenesis                                                                    |
| Blue   | AT5G11890       | <i>EMB3135</i> | Unknown                                                             | None                                                                                                          |
| Blue   | AT5G09900       | <i>EMB2107</i> | 26S Proteasome Regulatory Subunit                                   | Component of 26S proteasome lid                                                                               |
| Blue   | AT5G06240       | <i>EMB2735</i> | Unknown                                                             | None                                                                                                          |
| Blue   | AT5G05680       | <i>EMB2789</i> | Nuclear Envelope Protein (Nup88)                                    | Nuclear protein export; Spindle apparatus function                                                            |
| Blue   | AT5G02190       | <i>ASP38</i>   | Aspartic Protease                                                   | ER-localized protein                                                                                          |
| Blue   | AT5G02250       | <i>EMB2730</i> | Ribonuclease II Family Protein                                      | 3' to 5' Exoribonuclease; Maturation of chloroplast RNAs                                                      |
| Blue   | AT3G60740       | <i>TTN1</i>    | Tubulin Folding Cofactor D                                          | Regulation of B-tubulin folding and microtubule dynamics                                                      |
| Blue   | AT3G55010       | <i>EMB2818</i> | Phosphoribosylformylglycinamide Cyclo-Ligase (PUR5)                 | AIR synthetase; Purine biosynthesis                                                                           |
| Blue   | AT3G54650       | <i>FBL17</i>   | F-Box Protein                                                       | Cell cycle regulation in male gametophyte development                                                         |
| Blue   | AT3G50870       | <i>HAN</i>     | GATA Factor Transcriptional Regulator                               | Regulation of transcription                                                                                   |
| Blue   | AT3G49240       | <i>EMB1796</i> | PPR Protein                                                         | Editing of mitochondrial and chloroplast transcripts; Interacts with DYW2                                     |
| Blue   | AT3G48750       | <i>CDC2A</i>   | A-Type Cyclin-Dependent Kinase                                      | Cell cycle control                                                                                            |
| Blue   | AT4G38440       | <i>IYO</i>     | Transcriptional Regulator                                           | RNA polymerase II interacting factor                                                                          |
| Blue   | AT4G33090       | <i>APM1</i>    | M1 Aminopeptidase                                                   | Proposed role in auxin transport                                                                              |
| Blue   | AT4G32720       | <i>LA1</i>     | RNA Binding Protein                                                 | RNA maturation and stability in nucleus                                                                       |
| Blue   | AT4G32410       | <i>RSW1</i>    | Cellulose Synthase                                                  | Cellulose biosynthesis; Primary cell wall formation                                                           |
| Blue   | AT4G32400       | <i>EMB104</i>  | Transmembrane Nucleotide Transporter                                | Protein localized to plastids and mitochondria                                                                |

|       |           |                |                                                                                     |                                                                                                     |
|-------|-----------|----------------|-------------------------------------------------------------------------------------|-----------------------------------------------------------------------------------------------------|
| Blue  | AT4G31810 | <i>CHY4</i>    | 3-Hydroxyisobutyryl-CoA Hydrolase                                                   | Valine degradation in mitochondria                                                                  |
| Blue  | AT4G27010 | <i>EMB2788</i> | Uncertain                                                                           | Possible role in ribosome biogenesis                                                                |
| Blue  | AT4G26500 | <i>EMB1374</i> | Fe-S Cluster Assembly Factor                                                        | Activator of Plastidic and Mitochondrial Desulfurases                                               |
| Blue  | AT4G23660 | <i>PPT1</i>    | 4-Hydroxybenzoate Polyprenyl Diphosphate Transferase                                | Ubiquinone Biosynthesis                                                                             |
| Blue  | AT4G21710 | <i>EMB1989</i> | RNA Polymerase II Subunit                                                           | Transcription                                                                                       |
| Blue  | AT4G20740 | <i>EMB3131</i> | PPR Protein                                                                         | RNA binding protein; Organellar gene function                                                       |
| Blue  | AT4G10760 | <i>EMB1706</i> | m6A Methyltransferase Complex Subunit                                               | N6-adenosine methylation of mRNA; mRNA modification, splicing, metabolism                           |
| Blue  | AT4G09980 | <i>EMB1691</i> | m6A Methyltransferase Complex Subunit                                               | N6-adenosine methylation of mRNA; mRNA modification, splicing, metabolism                           |
| Blue  | AT4G07410 | <i>PCN</i>     | WD-40 Repeat Protein                                                                | Proposed role in auxin signaling                                                                    |
| Blue  | AT4G02570 | <i>AXR6</i>    | Cullin 1 Protein; SCF Ubiquitin Ligase Complex Subunit                              | Protein degradation; Auxin response pathways                                                        |
| Blue  | AT4G02060 | <i>PRL</i>     | DNA Replication Licensing Factor                                                    | Initiation of replication                                                                           |
| Blue  | AT4G00231 | <i>ZIX</i>     | Unknown                                                                             | Armadillo Repeat Protein                                                                            |
| Blue  | AT1G56200 | <i>EMB1303</i> | Unknown                                                                             | Chloroplast-localized protein                                                                       |
| Blue  | AT3G20630 | <i>TTN6</i>    | Deubiquitinating Enzyme                                                             | Ubiquitin processing and recycling; Negative regulator of endoreduplication                         |
| Blue  | AT3G13200 | <i>EMB2769</i> | U5 Associated Protein                                                               | Proposed role in pre-mRNA splicing                                                                  |
| Blue  | AT1G24340 | <i>EMB2421</i> | Polyketide Hydroxylase-Related Monooxygenase                                        | None                                                                                                |
| Blue  | AT3G20440 | <i>EMB2729</i> | 1,4-Alpha-Glucan Branching Enzyme                                                   | Similar to starch branching enzyme                                                                  |
| Blue  | AT3G19770 | <i>VPS9A</i>   | Guanine Exchange Factor                                                             | Regulator of Rab5 GTPase; Membrane trafficking                                                      |
| Blue  | AT3G17910 | <i>EMB3121</i> | Cytochrome C Oxidase Assembly (Surf1)                                               | Mitochondrial electron transport                                                                    |
| Blue  | AT3G27670 | <i>RST1</i>    | Uncertain                                                                           | Plasma membrane protein; Cuticular wax formation                                                    |
| Blue  | AT3G04680 | <i>CLPS3</i>   | Polyadenylation Factor                                                              | mRNA 3' end processing                                                                              |
| Blue  | AT3G10670 | <i>NAP7</i>    | Plastidic SufC-Like ABC/ATPase                                                      | Fe-S cluster maintenance and repair                                                                 |
| Blue  | AT3G08950 | <i>HCC1</i>    | Cytochrome C Oxidase Assembly Factor                                                | Homolog of yeast copper chaperone                                                                   |
| Blue  | AT3G10220 | <i>EMB2804</i> | Tubulin Folding Cofactor B                                                          | Regulation of B-tubulin folding and microtubule dynamics                                            |
| Blue  | AT3G01610 | <i>EMB1354</i> | AAA ATPase                                                                          | Putative cell division control protein; Possible role in protein unfolding                          |
| Blue  | AT1G63160 | <i>EMB2811</i> | DNA Replication Factor C Subunit                                                    | DNA replication; PCNA clamp loading                                                                 |
| Blue  | AT1G77470 | <i>EMB2810</i> | DNA Replication Factor C Subunit                                                    | DNA replication; PCNA clamp loading; Chromatin assembly                                             |
| Blue  | AT1G67630 | <i>EMB2814</i> | DNA Polymerase Alpha; Beta Subunit                                                  | Initiation of DNA replication                                                                       |
| Blue  | AT1G80410 | <i>EMB2753</i> | N-Terminal Acetyltransferase                                                        | Protein modification                                                                                |
| Blue  | AT1G51450 | <i>TRAUCO</i>  | Trithorax Class Transcriptional Regulator; H3K4 Methyltransferase Complex Component | Regulation of transcription; Histone modification                                                   |
| Blue  | AT1G55870 | <i>PARN</i>    | Poly(A) Ribonuclease                                                                | Regulation of poly(A) status of mitochondrial mRNA                                                  |
| Blue  | AT1G62360 | <i>STM</i>     | Knotted Class Homeodomain Protein                                                   | Transcriptional regulation; Shoot meristem formation                                                |
| Blue  | AT1G07910 | <i>ZYG3</i>    | tRNA Ligase                                                                         | tRNA splicing in cytosol                                                                            |
| Blue  | AT1G34550 | <i>EMB2756</i> | Unknown                                                                             | None                                                                                                |
| Blue  | AT1G71820 | <i>SEC6</i>    | Subunit of Exocyst Complex                                                          | Tethering of secretory vesicles to plasma membrane                                                  |
| Blue  | AT1G08260 | <i>EMB2284</i> | Subunit of DNA Polymerase Epsilon                                                   | DNA replication and repair; Cell cycle control                                                      |
| Blue  | AT1G49400 | <i>EMB1129</i> | Ribosomal Protein S17                                                               | Translation in cytosol                                                                              |
| Blue  | AT1G21690 | <i>EMB1968</i> | Replication Factor C Subunit                                                        | DNA replication; PCNA clamp loading                                                                 |
| Blue  | AT1G15220 | <i>CCMH</i>    | Mitochondrial Thiol-Disulfide Oxidoreductase                                        | Mitochondrial cytochrome C maturation                                                               |
| Blue  | AT1G13980 | <i>EMB30</i>   | ARF Guanine Exchange Factor                                                         | Large membrane-associated ARF GEF; Role in vesicle trafficking and cell polarity                    |
| Blue  | AT1G76060 | <i>EMB1793</i> | Uncertain                                                                           | Complex 1 LYR motif protein                                                                         |
| Blue  | AT1G79490 | <i>EMB2217</i> | PPR Protein                                                                         | RNA binding protein; Organellar gene function                                                       |
| Blue  | AT2G17510 | <i>EMB2763</i> | 3' to 5' Exoribonuclease                                                            | Exosome component; Proposed role in ribosomal RNA processing                                        |
| Blue  | AT1G05600 | <i>EMB3101</i> | PPR Protein                                                                         | RNA binding protein; Organellar gene function                                                       |
| Blue  | AT2G17250 | <i>EMB2762</i> | Ribosome Biogenesis Factor                                                          | Nucleolar protein; Proposed role in rRNA processing                                                 |
| Blue  | AT2G16440 | <i>MCM4</i>    | Minichromosome Maintenance Complex Subunit                                          | DNA replication machinery                                                                           |
| Blue  | AT2G21470 | <i>EMB2764</i> | SUMO Activating Enzyme                                                              | Protein modification                                                                                |
| Blue  | AT1G60170 | <i>EMB1220</i> | Splicing Factor                                                                     | Pre-mRNA processing; Transcriptional gene silencing                                                 |
| Blue  | AT1G03360 | <i>RRP4</i>    | Exosome Subunit; Exonuclease                                                        | rRNA processing; RNA metabolism                                                                     |
| Blue  | AT1G10270 | <i>GRP23</i>   | Novel PPR Protein                                                                   | Putative transcriptional regulator; Interacts with RNA polymerase II                                |
| Blue  | AT2G18390 | <i>TTN5</i>    | ARL2 GTPase                                                                         | Regulation of B-tubulin folding and microtubule dynamics                                            |
| Blue  | AT2G20000 | <i>HBT</i>     | Anaphase Promoting Complex Subunit                                                  | Protein degradation; Cell cycle control                                                             |
| Blue  | AT2G01350 | <i>QPT</i>     | Quinolate Phosphoribosyl Transferase                                                | NAD biosynthesis from aspartate in plastids                                                         |
| Blue  | AT2G01420 | <i>PIN4</i>    | Transmembrane Auxin Efflux Carrier                                                  | Maintenance of embryonic auxin gradients                                                            |
| Blue  | AT2G38770 | <i>EMB2765</i> | RNA Helicase                                                                        | Pre-mRNA splicing; miRNA biogenesis                                                                 |
| Blue  | AT2G31060 | <i>EMB2785</i> | E2Fa Transcriptional Activator                                                      | Cell proliferation; Cell cycle control                                                              |
| Blue  | AT2G26060 | <i>EMB1345</i> | Cytosolic Fe-S Cluster Assembly Factor                                              | WD-40 repeat protein                                                                                |
| Blue  | AT2G07690 | <i>MCM5</i>    | Minichromosome Maintenance Complex Subunit                                          | DNA replication machinery                                                                           |
| Blue  | AT2G34260 | <i>WDR55</i>   | WD Repeat Protein                                                                   | Substrate recruitment for ubiquitin E3 ligase complexes                                             |
| Blue  | AT2G38280 | <i>FAC1</i>    | AMP Deaminase                                                                       | Purine biosynthesis; Outer mitochondrial membrane protein                                           |
| Blue  | AT2G41500 | <i>EMB2776</i> | Pre-mRNA Splicing Factor                                                            | Proposed role in pre-mRNA splicing                                                                  |
| Blue  | AT2G35030 | <i>COD1</i>    | Mitochondrial PPR Protein                                                           | Editing of cytochrome C oxidase, NADH dehydrogenase transcripts associated with respiratory complex |
| Blue  | AT2G26350 | <i>PEX10</i>   | Peroxisomal Membrane Protein; Ubiquitin-Protein Ligase                              | Import of matrix proteins into peroxisomes                                                          |
| Brown | AT4G16370 | <i>OPT3</i>    | Plasma Membrane Iron Transporter                                                    | Iron homeostasis                                                                                    |
| Brown | AT4G16440 | <i>NAR1</i>    | Cytosolic Fe-S Cluster Assembly Component                                           | None                                                                                                |

|               |           |                |                                                          |                                                                                                                           |
|---------------|-----------|----------------|----------------------------------------------------------|---------------------------------------------------------------------------------------------------------------------------|
| Brown         | AT5G13480 | <i>FY</i>      | mRNA Polyadenylation Factor                              | 3' End processing of specific mRNAs                                                                                       |
| Brown         | AT5G15920 | <i>EMB2782</i> | SMC5/6 Complex Subunit                                   | Sister chromatid cohesion; Homologous recombination between sister chromatids; Double-strand break repair                 |
| Brown         | AT5G66680 | <i>DGL1</i>    | Oligosaccharyltransferase (OST) Complex Subunit          | Proposed role in N-linked glycosylation of proteins                                                                       |
| Brown         | AT5G63290 | <i>HEMN1</i>   | Coproporphyrinogen III Oxidase; Mitochondrial Localized  | Tetrapyrrole biosynthesis                                                                                                 |
| Brown         | AT5G56290 | <i>EMB2790</i> | Peroxisome Targeting Protein                             | Receptor for peroxisomal protein import                                                                                   |
| Brown         | AT5G55490 | <i>GEX1</i>    | Plasma Membrane Protein                                  | Proposed role in signaling pathway in gametophyte and early embryo                                                        |
| Brown         | AT5G54800 | <i>GPT1</i>    | Plastidial Glucose-6-Phosphate/Phosphate Antiporter      | Metabolite import into plastids                                                                                           |
| Brown         | AT5G50960 | <i>NBP35</i>   | Cytosolic Fe-S Cluster Assembly Factor                   | Interacts with DRE2 protein                                                                                               |
| Brown         | AT5G46280 | <i>MCM3</i>    | Minichromosome Maintenance Complex Subunit               | DNA replication machinery                                                                                                 |
| Brown         | AT5G42390 | <i>SPP</i>     | Stromal Processing Peptidase                             | Cleavage of chloroplast transit peptide upon protein import from cytosol                                                  |
| Brown         | AT5G41480 | <i>GLA1</i>    | Dihydrofolate Synthetase                                 | Folate biosynthesis                                                                                                       |
| Brown         | AT5G40160 | <i>EMB506</i>  | Uncertain                                                | Ankyrin repeat protein; Plastid differentiation                                                                           |
| Brown         | AT5G37630 | <i>EMB2656</i> | Chromosome Condensation Factor                           | Similar to condensin subunit (CAP-G)                                                                                      |
| Brown         | AT5G18820 | <i>EMB3007</i> | Chloroplast Chaperonin                                   | Folding of specific chloroplast proteins                                                                                  |
| Brown         | AT5G08470 | <i>EMB2817</i> | AAA ATPase                                               | Peroxisome biogenesis                                                                                                     |
| Brown         | AT3G60830 | <i>ARP7</i>    | Actin-Related, Nuclear-Localized Protein                 | Proposed role in chromatin remodeling                                                                                     |
| Brown         | AT3G55620 | <i>EMB1624</i> | Translation Initiation Factor                            | Regulation of translation and 80S ribosome assembly                                                                       |
| Brown         | AT3G46560 | <i>EMB2474</i> | Mitochondrial Inner Membrane Protein                     | Mitochondrial protein import                                                                                              |
| Brown         | AT4G29660 | <i>EMB2752</i> | Unknown                                                  | None                                                                                                                      |
| Brown         | AT4G26300 | <i>EMB1027</i> | Arginine tRNA Synthetase                                 | Translation in chloroplasts                                                                                               |
| Brown         | AT4G24270 | <i>EMB140</i>  | Uncertain                                                | RNA recognition motif protein; Possible role in pre-mRNA processing and modification                                      |
| Brown         | AT4G22970 | <i>AESP</i>    | Separase; Kinesin Activating Protein                     | Separation of sister chromatids; Regulation of microtubule dynamics                                                       |
| Brown         | AT4G21800 | <i>QOT2</i>    | ATP/GTP Binding Protein                                  | Proposed role in microtubule localization                                                                                 |
| Brown         | AT4G21300 | <i>AtDEK36</i> | PPR Protein                                              | RNA editing in mitochondria                                                                                               |
| Brown         | AT4G13750 | <i>EMB2597</i> | Uncertain                                                | Plant-specific nuclear protein; Proposed role in auxin response                                                           |
| Brown         | AT4G11150 | <i>EMB2448</i> | Vacuolar H+ ATPase                                       | Vacuolar proton pump component; Required for Golgi organization and secretory pathways                                    |
| Brown         | AT4G03240 | <i>FH</i>      | Frataxin                                                 | Mitochondrial and Chloroplast Fe-S cluster metabolism                                                                     |
| Brown         | AT4G02990 | <i>BSM</i>     | Uncertain                                                | Plastid-localized mTERF protein; Plastid gene expression                                                                  |
| Brown         | AT3G18290 | <i>EMB2454</i> | E3 Ubiquitin Ligase                                      | Iron response mediator; Interacts with transcriptional regulators                                                         |
| Brown         | AT3G16810 | <i>APUM24</i>  | Nucleolar Pumilio Class RNA Binding Protein              | Pre-rRNA processing                                                                                                       |
| Brown         | AT3G13930 | <i>MTE2-2</i>  | Mitochondrial Pyruvate Dehydrogenase Subunit             | Basic metabolism; Entry into citric acid cycle                                                                            |
| Brown         | AT3G15660 | <i>GRXS15</i>  | Mitochondrial Glutaredoxin S15                           | Fe-S protein maturation                                                                                                   |
| Brown         | AT3G17300 | <i>EMB2786</i> | Uncertain                                                | Putative Complex I (LYR domain) protein; Possible role in Fe-S cluster assembly; Mitochondrial electron transport         |
| Brown         | AT3G04460 | <i>PEX12</i>   | Peroxisomal Ubiquitin-Protein Ligase                     | Required for peroxisome biogenesis                                                                                        |
| Brown         | AT3G08800 | <i>SLEL1</i>   | Subunit of snRNA 3' End Maturation Complex               | Required for endosome localization of SHORT ROOT transcription factor                                                     |
| Brown         | AT3G07430 | <i>EMB1990</i> | Uncertain                                                | Integral membrane, chloroplast division protein; Functions in distribution of nucleoids in chloroplasts                   |
| Brown         | AT3G07630 | <i>ADT2</i>    | Arogenate Dehydrogenase; Prephenate Dehydratase          | Phenylalanine biosynthesis; Bifunctional enzyme                                                                           |
| Brown         | AT1G73590 | <i>PIN1</i>    | Auxin Efflux Carrier                                     | Maintenance of embryonic auxin gradients                                                                                  |
| Brown         | AT1G55900 | <i>EMB1860</i> | Inner Mitochondrial Membrane Protein                     | Import of mitochondrial matrix proteins                                                                                   |
| Brown         | AT1G20200 | <i>EMB2719</i> | 26S Proteasome Regulatory Subunit                        | Component of 26S proteasome; Protein degradation                                                                          |
| Brown         | AT1G44900 | <i>MCM2</i>    | DNA Helicase; Minichromosome Maintenance Complex Subunit | DNA replication machinery                                                                                                 |
| Brown         | AT1G79810 | <i>PEX2</i>    | Peroxisomal Membrane Protein; Ubiquitin-Protein Ligase   | Import of matrix proteins into peroxisomes                                                                                |
| Brown         | AT1G80070 | <i>SUS2</i>    | PRP8 Splicing Factor                                     | Pre-mRNA processing factor; Spliceosome component                                                                         |
| Brown         | AT1G21650 | <i>SECA2</i>   | Chloroplast Inner Envelope Translocase                   | Chloroplast protein import                                                                                                |
| Brown         | AT1G13120 | <i>GLE1</i>    | Nucleoporin; Nuclear Pore Complex Subunit                | RNA transport from nucleus to cytosol                                                                                     |
| Brown         | AT2G04030 | <i>EMB1956</i> | Heat Shock Protein                                       | Chloroplast-localized molecular chaperone; Proposed role in chloroplast protein import and thylakoid membrane maintenance |
| Brown         | AT1G59990 | <i>EMB3108</i> | DEAD Box RNA Helicase                                    | Proposed role in chloroplast ribosome biogenesis                                                                          |
| Brown         | AT1G79230 | <i>STR1</i>    | Mitochondrial Sulfurtransferase 1                        | Rhodanese; Sulfur transfer; Cysteine degradation                                                                          |
| Brown         | AT1G67490 | <i>KNF</i>     | Alpha Glucosidase 1                                      | Early step in N-glycan trimming of glycoproteins                                                                          |
| Brown         | AT1G67320 | <i>EMB2813</i> | DNA Polymerase Alpha; Primase Subunit                    | Initiation of DNA replication                                                                                             |
| Brown         | AT2G15690 | <i>DYW2</i>    | PPR Protein                                              | Editing of chloroplast and mitochondrial transcripts; Interacts with NUWA                                                 |
| Brown         | AT2G18510 | <i>EMB2444</i> | Spliceosome-Associated Protein                           | RNA recognition motif (RRM) protein; RNA processing                                                                       |
| Brown         | AT2G29530 | <i>TIM10</i>   | Mitochondrial Inner Membrane Protein                     | Mitochondrial protein import                                                                                              |
| Brown         | AT2G37560 | <i>ORC2</i>    | Origin Recognition Complex Subunit                       | DNA replication; Chromatin structure; Gene silencing                                                                      |
| Brown         | AT2G44520 | <i>COX10</i>   | Mitochondrial Farnesyltransferase                        | Cytochrome C oxidase biogenesis                                                                                           |
| Brown         | AT2G45690 | <i>SSE</i>     | Peroxisomal Biogenesis Factor                            | Required for protein and oil body biogenesis                                                                              |
| Cyan          | AT5G08170 | <i>EMB1873</i> | Agmatine Iminohydrolase                                  | Putrescine biosynthesis                                                                                                   |
| Cyan          | AT1G08510 | <i>FATB</i>    | Acyl-Acyl Carrier Protein Thioesterase                   | Saturated fatty acid biosynthesis                                                                                         |
| Cyan          | AT2G27100 | <i>SERRATE</i> | Zinc Finger Protein                                      | Pre-mRNA splicing; miRNA biogenesis                                                                                       |
| Darkgreen     | AT1G19770 | <i>PUP14</i>   | Purine Permease Transporter                              | Uptake of bioactive cytokinins to cytosol                                                                                 |
| Darkgreen     | AT2G28620 | <i>RSW7</i>    | Kinesin-5 Protein                                        | Microtubule organization in mitotic spindles                                                                              |
| Darkgrey      | AT2G41720 | <i>EMB2654</i> | PPR Protein                                              | Trans-splicing of plastid rps12 transcript                                                                                |
| Darkred       | AT1G15110 | <i>PSS1</i>    | Phosphatidylserine Synthase                              | Phosphatidylserine (membrane phospholipid) biosynthesis                                                                   |
| Darkturquoise | AT3G05680 | <i>EMB2016</i> | m6A Methyltransferase Complex Subunit                    | N6-adenosine methylation of mRNA; mRNA modification, splicing, metabolism                                                 |
| Darkturquoise | AT1G63700 | <i>YDA</i>     | MAP3K Protein Kinase                                     | Protein phosphorylation, Signal transduction pathways                                                                     |

|               |           |                |                                                                    |                                                                                                                    |
|---------------|-----------|----------------|--------------------------------------------------------------------|--------------------------------------------------------------------------------------------------------------------|
| Darkturquoise | AT2G30920 | <i>EMB3002</i> | Hexaprenyldihydroxybenzoate Methyltransferase                      | Ubiquinone biosynthesis in mitochondria                                                                            |
| Green         | AT2G45330 | <i>EMB1067</i> | 2' tRNA Phosphotransferase                                         | Catalytic role in tRNA splicing                                                                                    |
| Green         | AT2G45270 | <i>GCP1</i>    | Mitochondrial Glycoprotease                                        | HSP70 superfamily protein                                                                                          |
| Green         | AT5G11040 | <i>TRSL120</i> | TRAPP1 Tethering Factor                                            | Membrane trafficking; Cell plate assembly during cytokinesis                                                       |
| Green         | AT5G14800 | <i>EMB2772</i> | Proline-5-Carboxylate (P5C) Reductase;Proline Biosynthetic Enzyme  | Catalyzes final step in proline biosynthesis from glutamate and ornithine                                          |
| Green         | AT5G26030 | <i>FC1</i>     | Ferrochelatase                                                     | Final enzyme for haem formation in the tetrapyrrole biosynthetic pathway                                           |
| Green         | AT5G24670 | <i>EMB2820</i> | tRNA Adenosine Deaminase Subunit                                   | Modification of wobble position of cytosolic tRNAs                                                                 |
| Green         | AT5G62440 | <i>DOM1</i>    | Uncertain                                                          | Nuclear protein; Similar to tomato LeDCLPutative role in ribosome biogenesis                                       |
| Green         | AT5G51430 | <i>EYE</i>     | Subunit of Golgi COG Complex                                       | Vesicle trafficking; Golgi structure and function                                                                  |
| Green         | AT5G51200 | <i>EMB3142</i> | Nuclear Pore Complex Protein (Nup205)                              | Nuclear protein export                                                                                             |
| Green         | AT5G50210 | <i>QS</i>      | NAD Biosynthesis                                                   | Catalyzes second step in NAD biosynthesis from aspartate in plastids                                               |
| Green         | AT5G49930 | <i>EMB1441</i> | Uncertain                                                          | Putative RNA binding protein; Possible role in ribosome biogenesis                                                 |
| Green         | AT5G40480 | <i>EMB3012</i> | Nuclear Pore Complex Protein (Nup210)                              | Nuclear protein export                                                                                             |
| Green         | AT5G39710 | <i>EMB2745</i> | PPR Protein                                                        | RNA binding protein; Organellar gene function                                                                      |
| Green         | AT5G22370 | <i>EMB1705</i> | GTP Binding Protein                                                | Microtubule organization                                                                                           |
| Green         | AT5G08130 | <i>BIM1</i>    | bHLH Protein Interactor of Transcription Factors                   | Brassinosteroid signaling                                                                                          |
| Green         | AT5G05560 | <i>EMB2771</i> | E3 Ubiquitin Ligase Subunit                                        | Anaphase promoting complex subunit; Cell cycle regulation                                                          |
| Green         | AT5G04920 | <i>VPS36</i>   | Endosomal Sorting Complex (ESCRT-II) Subunit                       | Vacuolar biogenesis; Plasma membrane protein turnover                                                              |
| Green         | AT3G55610 | <i>P5CS2</i>   | Delta 1-Pyrroline-5-Carboxylate Synthetase                         | Proline biosynthesis; Rate-limiting step                                                                           |
| Green         | AT3G55510 | <i>RBL</i>     | Uncertain                                                          | Noc2 domain protein                                                                                                |
| Green         | AT3G48110 | <i>EDD</i>     | Glycine tRNA Synthetase                                            | Translation in chloroplasts                                                                                        |
| Green         | AT4G39920 | <i>POR</i>     | Tubulin Folding Cofactor C                                         | Regulation of tubulin folding and microtubule dynamics                                                             |
| Green         | AT4G39120 | <i>IMPL2</i>   | Histidinol-Phosphate Phosphatase                                   | Histidine biosynthesis                                                                                             |
| Green         | AT4G34200 | <i>PGDH1</i>   | 3-Phosphoglycerate Dehydrogenase                                   | Phosphoserine pathway of serine biosynthesis in plastids                                                           |
| Green         | AT4G26900 | <i>HISN4</i>   | Histidine Biosynthetic Enzyme                                      | Histidine biosynthesis                                                                                             |
| Green         | AT4G20060 | <i>EMB1895</i> | snRNA Processing Factor                                            | snRNA 3' end maturation; Pre-mRNA splicing                                                                         |
| Green         | AT4G20090 | <i>EMB1025</i> | PPR Protein                                                        | RNA binding protein; Organellar gene function                                                                      |
| Green         | AT4G05410 | <i>YAO</i>     | Nucleolar WD-40 Repeat Protein; Putative U3 snoRNP Complex Subunit | Potential role in 18S pre-rRNA processing                                                                          |
| Green         | AT4G03430 | <i>EMB2770</i> | Spliceosome-Interacting Protein                                    | Pre-mRNA splicing factor                                                                                           |
| Green         | AT4G00450 | <i>CCT</i>     | Transcriptional Regulator                                          | Modulates function of Mediator complex                                                                             |
| Green         | AT1G19850 | <i>MP</i>      | B3 Domain Transcription Factor                                     | Transcriptional regulation; Auxin response pathway                                                                 |
| Green         | AT3G24560 | <i>RSY3</i>    | Putative Lysidine-tRNA-Ile Synthetase                              | Chloroplast tRNA editing                                                                                           |
| Green         | AT3G07060 | <i>EMB1974</i> | Unknown                                                            | None                                                                                                               |
| Green         | AT3G06350 | <i>EMB3004</i> | Dehydroquinase Dehydratase; Shikimate Dehydrogenase                | Chorismate biosynthesis                                                                                            |
| Green         | AT3G02280 | <i>ATR3</i>    | Cytochrome P450 Reductase Like                                     | NR1 subfamily of diflavin reductases; Potential role in Fe-S cluster biogenesis                                    |
| Green         | AT3G09070 | <i>OPS</i>     | Uncertain                                                          | Polar-localized, plasma membrane-associated protein;Role in protophloem development; cotyledon vascular complexity |
| Green         | AT1G17690 | <i>NOF1</i>    | Nucleolar Protein                                                  | None                                                                                                               |
| Green         | AT1G19080 | <i>TTN10</i>   | GIN5 Complex Subunit                                               | Initiation of replication                                                                                          |
| Green         | AT1G12360 | <i>KEU</i>     | Cytokinesis-Related Sec1 Protein                                   | Regulator of vesicle trafficking; Binds to cytokinesis-specific KNOLLE protein                                     |
| Green         | AT1G68990 | <i>MGP3</i>    | Mitochondrial Phage-Type RNA Polymerase                            | Transcription of mitochondrial genes                                                                               |
| Green         | AT1G71440 | <i>PFI</i>     | Tubulin Folding Cofactor E                                         | Regulation of tubulin folding and microtubule dynamics                                                             |
| Green         | AT1G67960 | <i>POD1</i>    | Uncertain                                                          | Proposed role in ER protein retention                                                                              |
| Green         | AT1G14610 | <i>TWN2</i>    | Valine tRNA Synthetase                                             | Translation in mitochondria and cytosol                                                                            |
| Green         | AT1G43710 | <i>EMB1075</i> | Serine Decarboxylase                                               | Ethanolamine biosynthesis                                                                                          |
| Green         | AT1G20050 | <i>HYD1</i>    | Sterol Isomerase                                                   | Catalyzes sterol biosynthetic step downstream of FACKEL                                                            |
| Green         | AT1G50030 | <i>TOR</i>     | Protein Kinase (Target of Rapamycin)                               | Signaling pathways                                                                                                 |
| Green         | AT1G49510 | <i>EMB1273</i> | Unknown                                                            | Putative chloroplast protein                                                                                       |
| Green         | AT1G20960 | <i>EMB1507</i> | Spliceosome-Associated RNA Helicase                                | RNA processing; Splicing of FLC transcripts                                                                        |
| Green         | AT1G75660 | <i>XRN3</i>    | 5'-3' Exoribonuclease                                              | Nuclear degradation of aberrant RNAs; Suppressor of post-transcriptional gene silencing                            |
| Green         | AT2G31530 | <i>EMB2289</i> | Chloroplast Inner Envelope Translocase                             | Import and integration of inner envelope membrane proteins                                                         |
| Green         | AT2G21710 | <i>EMB2219</i> | Uncertain                                                          | Chloroplast-localized mTERF domain protein;Putative role in chloroplast gene expression                            |
| Green         | AT2G31340 | <i>EMB1381</i> | Unknown                                                            | None                                                                                                               |
| Green         | AT1G08840 | <i>EMB2411</i> | DNA Replication Helicase; Nuclease                                 | DNA replication and repair; Okazaki fragment metabolism                                                            |
| Green         | AT2G38020 | <i>VCL1</i>    | Vacuolar Sorting Protein (Vps16)                                   | Vacuole biogenesis; Protein trafficking to the vacuole                                                             |
| Green         | AT2G28880 | <i>EMB1997</i> | Bifunctional PABA Synthase; Glutamine Amidotransferase             | Para-aminobenzoic acid / folate biosynthesis                                                                       |
| Green         | AT2G32280 | <i>VCC</i>     | Unknown                                                            | Plant-specific protein; Role in cotyledon vascular complexity                                                      |
| Green         | AT2G22870 | <i>EMB2001</i> | Uncertain                                                          | Organelle-targeted GTPase (EngB/YihA family);Putative ribosome biogenesis GTPase                                   |
| Green         | AT2G34780 | <i>EMB1611</i> | Uncertain                                                          | Putative role in promoting cell division                                                                           |
| GreenYellow   | AT5G57930 | <i>EMB1629</i> | Putative Role in Accumulation of Fe-S Complexes                    | Chloroplast-localized protein                                                                                      |
| GreenYellow   | AT4G04350 | <i>EMB2369</i> | Leucine tRNA Synthetase                                            | Translation in chloroplasts                                                                                        |
| GreenYellow   | AT4G02790 | <i>EMB3129</i> | Chloroplast-Targeted RbgA GTPase                                   | Chloroplast ribosome biogenesis                                                                                    |
| GreenYellow   | AT3G01370 | <i>CFM2</i>    | Chloroplast Intron Splicing Factor                                 | Splicing of plastid group II introns                                                                               |
| GreenYellow   | AT2G31305 | <i>INH3</i>    | Inhibitor of Protein Phosphatase 1 Catalytic Activity              | Regulation of signaling pathways                                                                                   |
| GreenYellow   | AT1G70070 | <i>ISE2</i>    | RNA Helicase                                                       | Chloroplast RNA processing                                                                                         |
| GreenYellow   | AT2G25660 | <i>EMB2410</i> | Unknown                                                            | None                                                                                                               |

|              |           |                |                                                                                                        |                                                                                                         |
|--------------|-----------|----------------|--------------------------------------------------------------------------------------------------------|---------------------------------------------------------------------------------------------------------|
| GreenYellow  | AT2G30410 | <i>KIS</i>     | Tubulin Folding Cofactor A                                                                             | Regulation of tubulin folding and microtubule dynamics                                                  |
| Grey         | AT3G57870 | <i>EMB1637</i> | SUMO Conjugating Enzyme                                                                                | Protein modification; Role in stress response; Cell cycle control                                       |
| Grey         | AT3G27750 | <i>EMB3123</i> | PPR Protein                                                                                            | Splicing of specific group II introns in plastids                                                       |
| Grey60       | AT5G13710 | <i>SMT1</i>    | Sterol Methyltransferase                                                                               | Sterol biosynthesis; Modulation of cholesterol levels                                                   |
| Lightcyan    | AT3G54170 | <i>FIP37</i>   | m6A Methyltransferase Complex Subunit                                                                  | N6-adenosine methylation of mRNA; mRNA modification, splicing, metabolism                               |
| Lightcyan    | AT2G43650 | <i>EMB2777</i> | Small Subunit (SSU) Processome Complex Interacting Protein                                             | Nucleolar protein; Proposed role in rRNA biogenesis                                                     |
| LightGreen   | AT4G31160 | <i>DCAF1</i>   | Nuclear Ubiquitin E3 Ligase                                                                            | Protein degradation                                                                                     |
| LightYellow  | AT4G31770 | <i>DBR1</i>    | Lariat Debranching Enzyme                                                                              | Removal of spliced introns; Degradation of lariat RNAs; Regulation of miRNA biogenesis                  |
| LightYellow  | AT3G12080 | <i>EMB2738</i> | Uncertain                                                                                              | Putative ribosome biogenesis GTPase                                                                     |
| LightYellow  | AT1G21310 | <i>RSH</i>     | Cell Wall Hydroxyproline-Rich Glycoprotein; Extensin                                                   | Cell wall protein required for normal cell shape and positioning of cell plate during cytokinesis       |
| LightYellow  | AT1G32930 | <i>GALT31A</i> | Galactosyltransferase; Galactosylation of Arabinogalactan Protein (AGP) Side Chains in Golgi Apparatus | Elongation of B-1,6-galactan side chains on AGPs                                                        |
| LightYellow  | AT2G26890 | <i>GRV2</i>    | DnaJ Domain Protein (RME-8)                                                                            | Endocytosis; Vacuolar sorting; Protein trafficking                                                      |
| Magenta      | AT3G54350 | <i>EMB1967</i> | Forkhead-Associated (FHA) Domain Protein                                                               | Putative role in signal transduction pathways                                                           |
| Magenta      | AT4G02720 | <i>MAS2</i>    | Perinucleolar Protein; Homolog of Human NKAP                                                           | 45S rDNA silencing; Interacts with splicing and ribosome biogenesis proteins                            |
| Magenta      | AT1G01370 | <i>CENH3</i>   | Centromere-Specific Histone                                                                            | Component of centromeric nucleosome                                                                     |
| Magenta      | AT1G64570 | <i>DUO3</i>    | Homeodomain Protein                                                                                    | Putative transcriptional regulator                                                                      |
| Magenta      | AT1G48410 | <i>AGO1</i>    | Argonate; Effector in Small RNA-Based Gene Silencing                                                   | Cleavage or translational inhibition of target RNAs; Methylation of target DNAs                         |
| Magenta      | AT2G36230 | <i>HISN3</i>   | BBMII Isomerase; Histidine Biosynthetic Enzyme                                                         | Catalyzes third step in histidine biosynthesis                                                          |
| Magenta      | AT1G65440 | <i>SPT6L</i>   | Transcript Elongation Factor                                                                           | Proposed role in transcription initiation and chromatin structure                                       |
| Magenta      | AT1G09770 | <i>CDC5</i>    | MYB Domain Transcription Factor                                                                        | Cell cycle control; Proposed role in miRNA biogenesis                                                   |
| Magenta      | AT2G39080 | <i>EMB2799</i> | Uncertain                                                                                              | Potential role in chloroplast nutrient transport                                                        |
| Midnightblue | AT4G19350 | <i>EMB3006</i> | Unknown                                                                                                | None                                                                                                    |
| Midnightblue | AT2G26830 | <i>EMB1187</i> | Choline/Ethanolamine Kinase                                                                            | Enzyme in phospholipid (phosphatidylcholine) biosynthesis                                               |
| Orange       | AT1G24706 | <i>EMB2793</i> | THO/TREX Complex Subunit                                                                               | RNA transport and splicing; miRNA biogenesis                                                            |
| Pink         | AT4G29910 | <i>EMB2798</i> | Origin of Replication Complex                                                                          | Initiation of replication                                                                               |
| Pink         | AT2G02150 | <i>EMB2794</i> | Putative PPR Protein                                                                                   | Putative RNA binding protein                                                                            |
| Purple       | AT3G52590 | <i>EMB2167</i> | Ubiquitin Fused to Ribosomal Protein L40                                                               | Ubiquitin ribosomal fusion protein                                                                      |
| Purple       | AT1G19800 | <i>TGD1</i>    | Chloroplast Envelope Protein; ABC Transporter                                                          | Import of lipids into chloroplasts                                                                      |
| Purple       | AT1G08130 | <i>LIG1</i>    | DNA Ligase                                                                                             | DNA replication and repair; Component of DNA demethylation machinery                                    |
| Purple       | AT2G04530 | <i>TRZ2</i>    | tRNase Z Enzyme; Plastid tRNA Processing                                                               | Cleavage of 3' end of plastid tRNA precursor                                                            |
| Red          | AT5G19620 | <i>OEP80</i>   | Chloroplast Outer Envelope Protein                                                                     | Uncertain role in chloroplast protein import                                                            |
| Red          | AT5G63050 | <i>EMB2759</i> | Unknown                                                                                                | None                                                                                                    |
| Red          | AT5G62410 | <i>TTN3</i>    | SMC2 Condensin                                                                                         | Chromosome condensation                                                                                 |
| Red          | AT5G57590 | <i>BIO1</i>    | 7-KAP, DAP Aminotransferase; Dethiobiotin Synthetase                                                   | Biotin synthesis in mitochondria; Bifunctional (BIO3-BIO1) protein                                      |
| Red          | AT5G48600 | <i>SMC4</i>    | Condensin Subunit                                                                                      | Chromatin condensation; Chromosome segregation; Silencing of pericentromeric transposons                |
| Red          | AT5G18570 | <i>EMB3138</i> | Chloroplast Ogb-Like GTPase                                                                            | Plastid ribosome biogenesis                                                                             |
| Red          | AT3G61780 | <i>EMB1703</i> | Unknown                                                                                                | None                                                                                                    |
| Red          | AT3G54670 | <i>TTN8</i>    | SMC1 Cohesin                                                                                           | Chromosomal ATPase; Sister chromatid cohesion; Chromosome segregation                                   |
| Red          | AT3G54720 | <i>AMP1</i>    | Putative Glutamate Carboxypeptidase                                                                    | Similar to N-acetyl a-linked acidic dipeptidase; Precise biochemical function uncertain                 |
| Red          | AT4G39620 | <i>EMB2453</i> | PPR Protein                                                                                            | Proposed role in chloroplast tRNA maturation; Ribosome biogenesis                                       |
| Red          | AT4G38430 | <i>RopGEF1</i> | Guanine Nucleotide Exchange Factor                                                                     | Activator of Rho GTPases of plants                                                                      |
| Red          | AT4G35540 | <i>PTF2</i>    | Plant-Specific TFIIB-Related Protein                                                                   | General transcription factor                                                                            |
| Red          | AT4G33460 | <i>EMB2751</i> | ABC Transporter                                                                                        | Proposed role in chloroplast membrane transport                                                         |
| Red          | AT4G31780 | <i>EMB2797</i> | MGDG (Galactolipid) Synthesis                                                                          | Monogalactosyldiacylglycerol biosynthesis                                                               |
| Red          | AT3G20740 | <i>FIE</i>     | Polycomb Repressive Complex Subunit                                                                    | Chromatin modification; Histone methylation                                                             |
| Red          | AT3G04340 | <i>EMB2458</i> | Chloroplast AAA-ATPase; Ycf2-FtsHi Complex Subunit                                                     | Required for chloroplast protein import                                                                 |
| Red          | AT1G55350 | <i>EMB1275</i> | Calpain-Type Cysteine Protease                                                                         | Homolog of maize DEK1; Transmembrane protein required for mechanosensitive calcium ion channel function |
| Red          | AT1G53580 | <i>ETHE1</i>   | Mitochondrial Sulfur Dioxigenase                                                                       | Sulfide detoxification                                                                                  |
| Red          | AT1G80260 | <i>EMB1427</i> | Gamma Tubulin; GCP5 Subunit                                                                            | Microtubule nucleation                                                                                  |
| Red          | AT1G10510 | <i>EMB2004</i> | Uncertain                                                                                              | Leucine-rich repeat protein; Chloroplast localized; Similar to ribonuclease inhibitor proteins          |
| Red          | AT1G67440 | <i>EMB1688</i> | Uncertain                                                                                              | Putative ribosome biogenesis GTPase                                                                     |
| Red          | AT2G17800 | <i>ROP3</i>    | ROP GTPase                                                                                             | Auxin transport and response                                                                            |
| Red          | AT2G41350 | <i>EMB2819</i> | Augmin Complex Subunit                                                                                 | Microtubule dynamics; Mitotic spindle formation                                                         |
| Red          | AT2G03150 | <i>EMB1579</i> | Uncertain                                                                                              | Calcium binding protein                                                                                 |
| Red          | AT2G34650 | <i>PID</i>     | Serine-Threonine Protein Kinase                                                                        | Positive regulator of polar auxin transport                                                             |
| Red          | AT2G44190 | <i>EMB3116</i> | Novel Microtubule-Associated Protein                                                                   | Endosperm nuclear division and cellularization                                                          |
| RoyalBlue    | AT4G13940 | <i>EMB1395</i> | S-Adenosyl Homocysteine Hydrolase                                                                      | Amino acid and nucleotide metabolism; Indirect role in gene silencing                                   |
| Salmon       | AT5G46210 | <i>CUL4</i>    | E3 Ubiquitin Ligase Subunit                                                                            | None                                                                                                    |
| Salmon       | AT1G69270 | <i>RPK1</i>    | Receptor-Like Protein Kinase                                                                           | Signaling pathways                                                                                      |
| Salmon       | AT1G65450 | <i>GLAUCE</i>  | BAHD Family Acyltransferase                                                                            | Unknown metabolic role in female gametophyte central cell; Required for fusion with second sperm cell   |
| Salmon       | AT2G38670 | <i>PECT1</i>   | Phosphatidylethanolamine Biosynthetic Enzyme                                                           | Rate-limiting enzyme in CDP-Etn pathway; Mitochondrial localized protein                                |
| Tan          | AT4G21190 | <i>EMB1417</i> | PPR Protein                                                                                            | RNA binding protein; Organellar gene function                                                           |
| Tan          | AT3G20070 | <i>TTN9</i>    | Unknown                                                                                                | None                                                                                                    |
| Turquoise    | AT1G67730 | <i>KCR1</i>    | B-Ketoacyl-Coenzyme A Reductase                                                                        | Long-chain fatty acid biosynthesis                                                                      |
| Turquoise    | AT1G28300 | <i>LEC2</i>    | B3 Domain Transcription Factor                                                                         | Transcriptional regulation                                                                              |

|           |           |                  |                                                                                                              |                                                                                                            |
|-----------|-----------|------------------|--------------------------------------------------------------------------------------------------------------|------------------------------------------------------------------------------------------------------------|
| Turquoise | AT5G13510 | <i>EMB3136</i>   | Chloroplast Ribosomal Protein L10                                                                            | Translation in chloroplasts                                                                                |
| Turquoise | AT5G08415 | <i>LIP1</i>      | Lipoyl Synthase                                                                                              | Lipoamide biosynthesis; Plastid-localized lipoylation of metabolic enzymes                                 |
| Turquoise | AT4G36810 | <i>GGPPS11</i>   | Geranylgeranyl Diphosphate Synthase                                                                          | Isoprenoid biosynthesis in plastids and cytosol                                                            |
| Turquoise | AT1G77360 | <i>APPR6</i>     | Mitochondrial PPR Protein                                                                                    | 5' maturation and translational initiation of mitochondrial ribosomal protein S3 mRNA                      |
| Turquoise | AT5G27720 | <i>EMB1644</i>   | U6 snRNA Associated Protein                                                                                  | Component of spliceosome; Role in pre-mRNA splicing                                                        |
| Turquoise | AT5G64580 | <i>EMB3144</i>   | Chloroplast AAA-ATPase; Ycf2-FtsHi Complex Subunit                                                           | Required for chloroplast protein import                                                                    |
| Turquoise | AT5G63920 | <i>TOP3a</i>     | Topoisomerase                                                                                                | DNA synthesis and repair                                                                                   |
| Turquoise | AT5G61410 | <i>EMB2728</i>   | Ribulose-5-Phosphate-3-Epimerase                                                                             | Role in Calvin cycle; Oxidative pentose phosphate pathway                                                  |
| Turquoise | AT5G58250 | <i>EMB3143</i>   | Unknown                                                                                                      | Chloroplast-localized protein                                                                              |
| Turquoise | AT5G53860 | <i>EMB2737</i>   | Uncertain                                                                                                    | Chloroplast-localized, DnaJ-like protein; Putative chaperone                                               |
| Turquoise | AT5G52920 | <i>PKP1</i>      | Plastidic Pyruvate Kinase B1 Subunit                                                                         | Fatty acid and seed oil biosynthesis                                                                       |
| Turquoise | AT5G51600 | <i>PLE</i>       | Microtubule-Associated Protein                                                                               | Coordination of microtubule and membrane dynamics during cytokinesis                                       |
| Turquoise | AT5G50390 | <i>EMB3141</i>   | PPR Protein                                                                                                  | RNA binding protein; Organellar gene function                                                              |
| Turquoise | AT5G50280 | <i>EMB1006</i>   | PPR Protein                                                                                                  | RNA binding protein; Organellar gene function                                                              |
| Turquoise | AT5G48230 | <i>EMB1276</i>   | Acetoacetyl CoA Thiolase                                                                                     | Cytosolic mevalonate pathway of isoprenoid biosynthesis                                                    |
| Turquoise | AT5G40950 | <i>PRPL27</i>    | Chloroplast Ribosomal Protein                                                                                | Translation in chloroplasts                                                                                |
| Turquoise | AT5G24400 | <i>EMB2024</i>   | 6-Phosphogluconolactonase                                                                                    | Role in pentose phosphate pathway                                                                          |
| Turquoise | AT5G22640 | <i>EMB1211</i>   | Chloroplast Protein Import Complex Subunit                                                                   | Component of 1 MD chloroplast inner membrane protein import complex                                        |
| Turquoise | AT5G16390 | <i>CAC1A</i>     | Biotin Carboxyl Carrier Protein                                                                              | Heteromeric acetyl-CoA carboxylase subunit; Fatty acid biosynthesis in plastids                            |
| Turquoise | AT5G14320 | <i>EMB3137</i>   | Chloroplast Ribosomal Protein S13                                                                            | Translation in chloroplasts                                                                                |
| Turquoise | AT5G13690 | <i>CYL1</i>      | Alpha-N-Acetyl-Glucosaminidase                                                                               | Arabinogalactan protein metabolism                                                                         |
| Turquoise | AT5G10480 | <i>PAS2</i>      | 3-Hydroxyl-Acyl-CoA Dehydratase; Elongase Complex Subunit                                                    | Very-long-chain fatty acid biosynthesis                                                                    |
| Turquoise | AT5G07280 | <i>EXS</i>       | LRR Receptor Kinase                                                                                          | Signal transduction pathway                                                                                |
| Turquoise | AT5G04560 | <i>DME</i>       | DNA Glycosylase                                                                                              | DNA demethylation in central cell of female gametophyte, vegetative cell of male gametophyte               |
| Turquoise | AT5G04810 | <i>PPR4</i>      | PPR Protein                                                                                                  | Trans-splicing of chloroplast rps12 transcript                                                             |
| Turquoise | AT5G04660 | <i>CYP77A4</i>   | Cytochrome P450                                                                                              | Epoxidase of unsaturated fatty acids; ER-localized protein                                                 |
| Turquoise | AT5G03800 | <i>EMB1899</i>   | PPR Protein                                                                                                  | RNA binding protein; Organellar gene function                                                              |
| Turquoise | AT3G63490 | <i>EMB3126</i>   | Chloroplast Ribosomal Protein L1                                                                             | Translation in chloroplasts                                                                                |
| Turquoise | AT5G01075 | <i>TWS1</i>      | Unknown                                                                                                      | Small protein localized to endoplasmic reticulum                                                           |
| Turquoise | AT3G63190 | <i>HFP108</i>    | Chloroplast Ribosome Recycling Factor                                                                        | Required for efficient chloroplast translation                                                             |
| Turquoise | AT3G57560 | <i>NAGK</i>      | Acetylglutamate Kinase                                                                                       | Arginine biosynthesis                                                                                      |
| Turquoise | AT3G54660 | <i>EMB2360</i>   | Chloroplast Glutathione Reductase                                                                            | Protection against oxidative stress                                                                        |
| Turquoise | AT3G54320 | <i>WR11</i>      | AP2/EREB Domain Transcription Factor                                                                         | Regulation of storage compound biosynthesis                                                                |
| Turquoise | AT3G52940 | <i>FK</i>        | Sterol C-14 Reductase                                                                                        | Sterol biosynthesis during embryo development                                                              |
| Turquoise | AT3G47520 | <i>pNAD-MDH</i>  | Plastid NAD-Dependent Malate Dehydrogenase                                                                   | Redox homeostasis; Heterotrophic metabolism; Component of plastid Ycf2 complex required for protein import |
| Turquoise | AT3G46740 | <i>TOC75-III</i> | Chloroplast Import Protein                                                                                   | Protein translocation channel in plastid outer membrane                                                    |
| Turquoise | AT4G34620 | <i>SSR16</i>     | Mitochondrial Ribosomal Protein S16                                                                          | Translation in mitochondria and chloroplasts                                                               |
| Turquoise | AT4G33680 | <i>AGD2</i>      | LL-Diaminopimelate Aminotransferase                                                                          | Lysine biosynthesis                                                                                        |
| Turquoise | AT4G29060 | <i>EMB2726</i>   | Translation Elongation Factor                                                                                | Translation in chloroplasts                                                                                |
| Turquoise | AT4G28210 | <i>EMB1923</i>   | Unknown                                                                                                      | None                                                                                                       |
| Turquoise | AT4G00220 | <i>JLO</i>       | LOB Domain Transcription Factor                                                                              | Auxin signaling pathways                                                                                   |
| Turquoise | AT3G29290 | <i>EMB2076</i>   | PPR Protein                                                                                                  | RNA binding protein; Organellar gene function                                                              |
| Turquoise | AT3G15190 | <i>PRPS20</i>    | Chloroplast Ribosomal Protein                                                                                | Translation in chloroplasts                                                                                |
| Turquoise | AT3G12670 | <i>EMB2742</i>   | CTP Synthase; UTP-Ammonia Ligase                                                                             | Ribonucleotide metabolism                                                                                  |
| Turquoise | AT3G18390 | <i>EMB1865</i>   | Chloroplast Splicing Factor                                                                                  | Splicing of plastid group II introns                                                                       |
| Turquoise | AT3G19810 | <i>DUF177A</i>   | Uncertain                                                                                                    | 23S rRNA accumulation                                                                                      |
| Turquoise | AT3G16290 | <i>EMB2083</i>   | Chloroplast AAA-ATPase; Ycf2-FtsHi Complex Subunit                                                           | Required for chloroplast protein import                                                                    |
| Turquoise | AT3G25920 | <i>RPL15</i>     | Chloroplast Ribosomal Protein                                                                                | Translation in chloroplasts                                                                                |
| Turquoise | AT3G25860 | <i>PLE2</i>      | Chloroplast Pyruvate Dehydrogenase Complex E2 Subunit                                                        | Acetyl-CoA formation in plastids                                                                           |
| Turquoise | AT3G26790 | <i>FUS3</i>      | B3 Domain Transcription Factor                                                                               | Regulator of gene expression during embryogenesis                                                          |
| Turquoise | AT3G26744 | <i>ICE1</i>      | bHLH Transcriptional Activator                                                                               | Regulation of stomatal development, cold tolerance, and endosperm breakdown                                |
| Turquoise | AT3G02660 | <i>EMB2768</i>   | Tyrosine tRNA Synthetase                                                                                     | Translation in mitochondria and chloroplasts                                                               |
| Turquoise | AT3G04790 | <i>EMB3119</i>   | Ribulose-5-Phosphate Isomerase                                                                               | Carbohydrate metabolism                                                                                    |
| Turquoise | AT1G12410 | <i>EMB3146</i>   | Chloroplast Clp Protease Subunit                                                                             | None                                                                                                       |
| Turquoise | AT2G43360 | <i>BIO2</i>      | Biotin Synthase                                                                                              | Catalyzes final step in biotin synthesis in mitochondria                                                   |
| Turquoise | AT1G62340 | <i>ALE1</i>      | Subtilisin-Like Serine Protease                                                                              | Cell signaling pathways; Possible role in processing of peptide ligands                                    |
| Turquoise | AT1G06950 | <i>TIC110</i>    | Chloroplast Inner Membrane Protein                                                                           | Chloroplast protein import                                                                                 |
| Turquoise | AT1G21970 | <i>LEC1</i>      | HAP3 Subunit of CCAAT-Binding Transcription Factor                                                           | Transcriptional regulation                                                                                 |
| Turquoise | AT1G02560 | <i>CLPP5</i>     | Chloroplast ClpP Protease Subunit                                                                            | None                                                                                                       |
| Turquoise | AT1G02680 | <i>TAF13</i>     | Transcriptional Regulator                                                                                    | Functions with PRC2 complex; Transcriptional repressor                                                     |
| Turquoise | AT1G07320 | <i>EMB2784</i>   | Chloroplast Ribosomal Protein L4                                                                             | Translation in chloroplasts                                                                                |
| Turquoise | AT1G75350 | <i>EMB2184</i>   | Chloroplast Ribosomal Protein L31                                                                            | Translation in chloroplasts                                                                                |
| Turquoise | AT1G04950 | <i>EMB2781</i>   | TATA Box Associated Factor; TFIID Subunit                                                                    | Regulation and initiation of transcription                                                                 |
| Turquoise | AT1G34430 | <i>EMB3003</i>   | Dihydrolipoamide S-Acetyltransferase; Chloroplast PyruvateDecarboxylase Complex, Putative E3 Binding Protein | Acetyl-CoA formation                                                                                       |
| Turquoise | AT1G12770 | <i>EMB1586</i>   | Mitochondrial RNA Helicase                                                                                   | RNA binding protein; Proposed role in processing mitochondrial transcripts                                 |

|           |           |                |                                                                   |                                                                                                  |
|-----------|-----------|----------------|-------------------------------------------------------------------|--------------------------------------------------------------------------------------------------|
| Turquoise | AT1G18370 | <i>HIK</i>     | Kinesin Required for Cytokinesis                                  | Localized to site of cell plate formation                                                        |
| Turquoise | AT1G50650 | <i>KRS</i>     | Endosperm-Specific, Cysteine-Rich Peptide                         | STIG1 family of small proteins; Required for normal embryo-endosperm adhesion                    |
| Turquoise | AT1G35680 | <i>RPL21C</i>  | Chloroplast Ribosomal Protein L21                                 | Translation in chloroplasts                                                                      |
| Turquoise | AT1G74970 | <i>TWN3</i>    | Chloroplast Ribosomal Protein S9                                  | Translation in chloroplasts                                                                      |
| Turquoise | AT1G74960 | <i>FAB1</i>    | Ketoacyl Carrier Protein Synthase                                 | Elongation of 16:0-ACP to 18:0-ACP in plastids                                                   |
| Turquoise | AT1G48350 | <i>EMB3105</i> | Chloroplast Ribosomal Protein L18                                 | Translation in chloroplasts                                                                      |
| Turquoise | AT1G17220 | <i>FUG1</i>    | Translation Initiation Factor                                     | Translation in chloroplasts                                                                      |
| Turquoise | AT1G62750 | <i>SCO1</i>    | Plastid Elongation Factor G                                       | Translation in chloroplasts                                                                      |
| Turquoise | AT1G11680 | <i>EMB1738</i> | Obtusifoliiol 14-Alpha Demethylase                                | Cytochrome P450 monooxygenase; Sterol biosynthetic enzyme                                        |
| Turquoise | AT1G23400 | <i>CAF2</i>    | Chloroplast Intron Splicing Factor                                | Splicing of plastid group II introns                                                             |
| Turquoise | AT2G05170 | <i>VPS11</i>   | Vacuolar Tethering Complex Subunit                                | Vacuolar biogenesis                                                                              |
| Turquoise | AT1G78630 | <i>EMB1473</i> | Chloroplast Ribosomal Protein L13                                 | Translation in chloroplasts                                                                      |
| Turquoise | AT1G36160 | <i>ACC1</i>    | Acetyl-CoA Carboxylase                                            | Very-long-chain fatty acid biosynthesis in cytosol                                               |
| Turquoise | AT1G30610 | <i>EMB2279</i> | PPR Protein                                                       | Plastid rpl2 and tmK intron splicing                                                             |
| Turquoise | AT2G14170 | <i>MMSD</i>    | Methylmalonate Semialdehyde Dehydrogenase                         | Valine degradation in mitochondria                                                               |
| Turquoise | AT2G27170 | <i>TTN7</i>    | SMC3 Cohesin                                                      | Sister chromatid cohesion; Chromosome segregation                                                |
| Turquoise | AT2G01860 | <i>EMB975</i>  | PPR Protein                                                       | RNA binding protein; Organellar gene function                                                    |
| Turquoise | AT2G36000 | <i>EMB3114</i> | Uncertain                                                         | Chloroplast-localized mTERF domain protein                                                       |
| Turquoise | AT2G28000 | <i>SLP</i>     | Chaperonin 60 alpha 1                                             | Protein folding in chloroplasts                                                                  |
| Turquoise | AT1G43170 | <i>EMB2207</i> | Ribosomal Protein L3A                                             | Translation in cytosol                                                                           |
| Turquoise | AT1G05190 | <i>EMB2394</i> | Chloroplast Ribosomal Protein L6                                  | Translation in chloroplasts                                                                      |
| Turquoise | AT1G08560 | <i>KN</i>      | Cytokinesis-Specific Syntaxin                                     | Vesicle fusion in cell division plane                                                            |
| Turquoise | AT2G01210 | <i>ZAR1</i>    | Plasma Membrane LRR-RLK                                           | Signaling pathways; Calmodulin binding                                                           |
| Turquoise | AT2G37920 | <i>EMB1513</i> | Uncertain                                                         | Similar to copper transporter proteins                                                           |
| Turquoise | AT2G24090 | <i>PRPL35</i>  | Chloroplast Ribosomal Protein                                     | Translation in chloroplasts                                                                      |
| Turquoise | AT2G03050 | <i>EMB93</i>   | Plastid mTERF-Related Protein                                     | Plastid signaling pathways                                                                       |
| Turquoise | AT2G32590 | <i>EMB2795</i> | Non-SMC Condensin Complex Subunit H                               | Sister chromatid segregation in mitosis                                                          |
| Turquoise | AT2G19450 | <i>TAG1</i>    | Diacylglycerol Transferase                                        | Storage lipid biosynthesis; Catalyzes final step in triacylglycerol biosynthetic pathway         |
| Turquoise | AT2G30200 | <i>EMB3147</i> | ACP-S-Malonyltransferase                                          | Fatty acid biosynthesis                                                                          |
| Turquoise | AT2G33800 | <i>EMB3113</i> | Chloroplast Ribosomal Protein S5                                  | Translation in chloroplasts                                                                      |
| Yellow    | AT1G48850 | <i>EMB1144</i> | Chorismate Synthase                                               | Aromatic amino acid biosynthesis                                                                 |
| Yellow    | AT5G16715 | <i>EMB2247</i> | Valine tRNA Synthetase                                            | Translation in chloroplasts                                                                      |
| Yellow    | AT5G15540 | <i>EMB2773</i> | Cohesin-Loading Complex Subunit                                   | Cohesin-chromatin interactions; Sister chromatid cohesion                                        |
| Yellow    | AT5G14760 | <i>AO</i>      | L-Aspartate Oxidase; NAD Biosynthetic Enzyme                      | Catalyzes first step in NAD biosynthesis from aspartate in plastids                              |
| Yellow    | AT5G56270 | <i>WRKY2</i>   | WRKY Transcription Factor                                         | Zygote polarity after fertilization                                                              |
| Yellow    | AT5G54440 | <i>CLUB</i>    | TRAPP1 Tethering Factor                                           | Membrane trafficking; Cell plate assembly during cytokinesis                                     |
| Yellow    | AT5G51340 | <i>SCC4</i>    | Cohesin Loading Complex, Kleisin Subunit                          | TPR protein; Chromatin structure maintenance                                                     |
| Yellow    | AT5G49160 | <i>MET1</i>    | DNA Methyltransferase                                             | DNA (CG) methylation                                                                             |
| Yellow    | AT5G43810 | <i>ZLL</i>     | Argonaute / EIF2C Family Protein                                  | Small RNA binding protein; Cleavage or translationalinhibition of target RNAs                    |
| Yellow    | AT5G08080 | <i>SYPL32</i>  | Cytokinesis-Specific SNARE Protein                                | Membrane vesicle fusion in cytokinesis                                                           |
| Yellow    | AT3G54010 | <i>PAS1</i>    | Immunophilin-Like FK506 Binding Protein                           | Interacts with fatty acid elongase complex; Required for very-long-chain fatty acid biosynthesis |
| Yellow    | AT4G30580 | <i>EMB1995</i> | Plastidic Lysophosphatidic Acid Acyltransferase                   | Fatty acid and phospholipid metabolism                                                           |
| Yellow    | AT4G24900 | <i>TTL</i>     | Unknown                                                           | C2H2 domain protein; Nuclear localized                                                           |
| Yellow    | AT4G23100 | <i>RML1</i>    | Gamma-Glutamylcysteine Synthetase                                 | First enzyme in glutathione biosynthetic pathway;Initiation and maintenance of cell division     |
| Yellow    | AT1G18640 | <i>PSP1</i>    | Phosphoserine Phosphatase                                         | Phosphoserine pathway of serine biosynthesis in plastids                                         |
| Yellow    | AT3G23110 | <i>EMB2800</i> | LRR Receptor-Like Protein                                         | Putative signaling function                                                                      |
| Yellow    | AT3G18110 | <i>EMB1270</i> | PPR Protein                                                       | RNA binding protein; Organellar gene function                                                    |
| Yellow    | AT1G10910 | <i>EMB3103</i> | PPR Protein                                                       | RNA binding protein; Organellar gene function                                                    |
| Yellow    | AT1G32490 | <i>EMB2733</i> | RNA Helicase                                                      | Proposed role in pre-mRNA splicing                                                               |
| Yellow    | AT1G01040 | <i>SUS1</i>    | RNA Helicase; Dicer-Like Enzyme                                   | Micro RNA biogenesis; Pri-miRNA processing                                                       |
| Yellow    | AT1G34770 | <i>NSE3</i>    | Non-SMC Component of SMC5/6 Complex                               | DNA repair and genome stability                                                                  |
| Yellow    | AT1G50240 | <i>TIO</i>     | Protein Kinase; Ortholog of FUSED in Animal Systems               | Signaling pathways required for cytokinesis                                                      |
| Yellow    | AT1G79560 | <i>EMB1047</i> | Chloroplast AAA-ATPase; Ycf2-FtsHi Complex Subunit                | Required for chloroplast protein import                                                          |
| Yellow    | AT1G55540 | <i>LNO1</i>    | Nucleoporin; Nuclear Pore Complex Subunit                         | RNA transport from nucleus to cytosol                                                            |
| Yellow    | AT2G20300 | <i>ALE2</i>    | Receptor-Like Protein Kinase                                      | Promotion of protoderm differentiation and cotyledon formation                                   |
| Yellow    | AT2G35650 | <i>CSLA7</i>   | Cellulose-Synthase-Like Glycosyltransferase; Beta-Mannan Synthase | Synthesis of cell wall polysaccharides                                                           |
| Yellow    | AT2G25710 | <i>HCS1</i>    | Holocarboxylase Synthetase                                        | Biotin attachment to carboxylases and decarboxylases                                             |
