# Supplementary material for: Weighted Gene Correlation Network Analysis (WGCNA) of Arabidopsis Somatic Embryogenesis (SE) and Identification of Key Gene Modules to Uncover SE-Associated Hub Genes
Source: Hindawi journal article supplement (doi:10.1155/2022/7471063), 2022-07-04
Supplement: f6 [file 7471063.f6.pdf]

**Table S6. TFs in the coexpression network**

| Gene identifier | Module | Alias                   | Description                                                                                                                | TF Family (PlantTFDB) | Target of miRNA |
|-----------------|--------|-------------------------|----------------------------------------------------------------------------------------------------------------------------|-----------------------|-----------------|
| AT1G05690       | Black  | BT3                     | BT3 (BTB and TAZ domain protein 3); protein binding / transcription regulator                                              | TAZ                   |                 |
| AT1G19210       | Black  |                         | AP2 domain-containing transcription factor, putative                                                                       | AP2-EREBP             |                 |
| AT1G19860       | Black  |                         | zinc finger (CCCH-type) family protein                                                                                     | C3H                   |                 |
| AT1G24610       | Black  |                         | SET domain-containing protein                                                                                              | SET                   |                 |
| AT1G27730       | Black  | ZAT10, STZ              | STZ (SALT TOLERANCE ZINC FINGER); nucleic acid binding / transcription factor/ zinc ion binding                            | C2H2                  |                 |
| AT1G30500       | Black  | NF-YA7                  | CCAAT-binding transcription factor (CBF-B/NF-YA) family protein                                                            | CCAAT                 |                 |
| AT1G66500       | Black  |                         | zinc finger (C2H2-type) family protein                                                                                     |                       |                 |
| AT1G71030       | Black  | MYBL2, ATMYBL2          | ATMYBL2 (Arabidopsis myb-like 2); DNA binding / transcription factor                                                       | MYB-related           |                 |
| AT1G75490       | Black  |                         | DNA binding / transcription factor                                                                                         | AP2-EREBP             |                 |
| AT2G31460       | Black  |                         | unknown protein                                                                                                            |                       |                 |
| AT2G31510       | Black  |                         | IBR domain-containing protein / ARIADNE-like protein ARI7 (ARI7)                                                           |                       |                 |
| AT2G32700       | Black  | LUH                     | WD-40 repeat family protein                                                                                                | LUG                   |                 |
| AT2G36480       | Black  |                         | zinc finger (C2H2-type) family protein                                                                                     |                       |                 |
| AT2G38880       | Black  | ATNF-YB1, ATHAP3, HAP3A | HAP3A (Heme activator protein (yeast) homolog 3A), HAP3A (Heme activator protein (yeast) homolog 3A); transcription factor | CCAAT                 |                 |
| AT2G42150       | Black  |                         | DNA-binding bromodomain-containing protein                                                                                 | MYB-related           |                 |
| AT2G42350       | Black  |                         | zinc finger (C3HC4-type RING finger) family protein                                                                        |                       |                 |
| AT2G42940       | Black  |                         | DNA-binding family protein                                                                                                 |                       |                 |
| AT2G46400       | Black  | ATWRKY46, WRKY46        | WRKY46 (WRKY DNA-binding protein 46); transcription factor                                                                 | WRKY                  |                 |
| AT3G03750       | Black  | SUVR3, SDG20            | SET domain-containing protein                                                                                              | SET                   |                 |
| AT3G06400       | Black  | CHR11                   | CHR11 (CHROMATIN-REMODELING PROTEIN 11); DNA-dependent ATPase                                                              | SNF2                  |                 |
| AT3G10330       | Black  |                         | transcription initiation factor IIB-2 / general transcription factor TFIIB-2 (TFIIB2)                                      |                       |                 |
| AT3G10810       | Black  |                         | zinc finger (C3HC4-type RING finger) family protein                                                                        |                       |                 |
| AT3G11110       | Black  |                         | zinc finger (C3HC4-type RING finger) family protein                                                                        |                       |                 |
| AT3G19580       | Black  | AZF2                    | AZF2 (ARABIDOPSIS ZINC-FINGER PROTEIN 2); nucleic acid binding / transcription factor/ zinc ion binding, unknown protein   | C2H2                  |                 |
| AT3G20310       | Black  | ATERF7, ATERF-7         | ERF7 (ETHYLENE RESPONSE FACTOR7); DNA binding / protein binding / transcription factor/ transcriptional repressor          | AP2-EREBP             |                 |
| AT3G49850       | Black  | TBP2, TRB3, ATTRB3      | ATTRB3/TRB3 (TELOMERE REPEAT BINDING FACTOR 1); DNA binding / transcription factor                                         | MYB-related           |                 |
| AT3G59580       | Black  | NLP9                    | RWP-RK domain-containing protein                                                                                           | RWP-RK                |                 |
| AT3G62610       | Black  | PGF2, ATMYB11           | AtMYB11 (myb domain protein 11); DNA binding / transcription factor                                                        | MYB                   |                 |
| AT4G18650       | Black  |                         | transcription factor-related                                                                                               |                       |                 |
| AT4G18670       | Black  |                         | leucine-rich repeat family protein / extensin family protein                                                               |                       |                 |
| AT4G23450       | Black  |                         | zinc finger (C3HC4-type RING finger) family protein                                                                        |                       |                 |
| AT4G23810       | Black  | ATWRKY53, WRKY53        | WRKY53 (WRKY DNA-binding protein 53); transcription factor                                                                 | WRKY                  |                 |
| AT4G28110       | Black  | ATMYB41                 | AtMYB41 (myb domain protein 41); DNA binding / transcription factor                                                        | MYB                   |                 |
| AT5G03410       | Black  | DPB,                    |                                                                                                                            |                       |                 |
| AT5G08750       | Black  |                         | zinc finger (C3HC4-type RING finger) family protein                                                                        |                       |                 |
| AT5G10120       | Black  |                         | ethylene insensitive 3 family protein                                                                                      | EIL                   |                 |
| AT5G10140       | Black  | FLF, AGL25, FLC         | FLC (FLOWERING LOCUS C), FLC (FLOWERING LOCUS C); transcription factor                                                     | MADS                  |                 |
| AT5G23610       | Black  |                         | unknown protein                                                                                                            |                       |                 |
| AT5G27650       | Black  |                         | PWWP domain-containing protein                                                                                             |                       |                 |
| AT5G45830       | Black  | GSQ5, DOG1              | DOG1 (DELAY OF GERMINATION 1)                                                                                              |                       |                 |
| AT5G47610       | Black  |                         | zinc finger (C3HC4-type RING finger) family protein                                                                        |                       |                 |
| AT5G48670       | Black  | FEM111, AGL80           | AGL80/FEM111 (AGAMOUS-LIKE80); DNA binding / transcription factor                                                          | MADS                  |                 |
| AT5G59340       | Black  | WOX2                    | WOX2 (WUSCHEL-related homeobox 2); transcription factor                                                                    | HB                    |                 |
| AT5G62470       | Black  | ATMYB96, mybcov1        | MYB96 (myb domain protein 96); DNA binding / transcription factor                                                          | MYB                   |                 |
| AT5G65070       | Black  | FCL4, MAF4, AGL69       | MAF4 (MADS AFFECTING FLOWERING 4); transcription factor, unknown protein                                                   | MADS                  |                 |
| AT1G02220       | Blue   | ANAC003                 | ANAC003 (Arabidopsis NAC domain containing protein 3); transcription factor                                                | NAC                   |                 |
| AT1G04050       | Blue   | SDG13, SUVR1            | SUVR1 (Arabidopsis homolog of SU(VAR)3-9 1); histone-lysine N-methyltransferase/ zinc ion binding                          | SET                   |                 |
| AT1G04250       | Blue   | IAA17, AXR3             | AXR3 (AUXIN RESISTANT 3); transcription factor                                                                             | AUX/IAA               |                 |
| AT1G04790       | Blue   |                         | zinc finger (C3HC4-type RING finger) family protein                                                                        |                       |                 |
| AT1G05120       | Blue   |                         | SNF2 domain-containing protein / helicase domain-containing protein / RING finger domain-containing protein                | SNF2                  |                 |

|           |      |                           |                                                                                                                                             |              |
|-----------|------|---------------------------|---------------------------------------------------------------------------------------------------------------------------------------------|--------------|
| AT1G05380 | Blue |                           | DNA binding, unknown protein                                                                                                                | PHD          |
| AT1G06070 | Blue | AtbZIP69                  | bZIP transcription factor, putative (bZIP69)                                                                                                | bZIP         |
| AT1G06150 | Blue | bHLH089, EMB1444          | transcription factor                                                                                                                        |              |
| AT1G07520 | Blue |                           | scarecrow transcription factor family protein                                                                                               | GRAS         |
| AT1G08320 | Blue |                           | DNA binding, bZIP family transcription factor                                                                                               | bZIP         |
| AT1G08620 | Blue |                           | transcription factor jumonji (jnj) family protein / zinc finger (C5HC2 type) family protein                                                 | Jumonji      |
| AT1G08900 | Blue |                           | carbohydrate transporter, unknown protein                                                                                                   |              |
| AT1G09250 | Blue |                           | transcription factor                                                                                                                        |              |
| AT1G10470 | Blue | IBC7, ATRR1, ARR4, MEE7   | ARR4 (RESPONSE REGULATOR 4); transcription regulator/ two-component response regulator                                                      | Orphans      |
| AT1G11950 | Blue |                           | transcription factor jumonji (jnjC) domain-containing protein                                                                               | Jumonji      |
| AT1G14510 | Blue | AL7                       | PHD finger family protein                                                                                                                   | Alfin-like   |
| AT1G14920 | Blue | RG2, GAI                  | GAI (GA INSENSITIVE); transcription factor                                                                                                  | GRAS         |
| AT1G16710 | Blue | HAC12                     | TAZ zinc finger family protein / zinc finger (ZZ type) family protein                                                                       | TAZ          |
| AT1G19050 | Blue | ARR7                      | ARR7 (RESPONSE REGULATOR 7); transcription regulator/ two-component response regulator                                                      | Orphans      |
| AT1G19310 | Blue |                           | zinc finger (C3HC4-type RING finger) family protein                                                                                         |              |
| AT1G21570 | Blue |                           | zinc finger (CCCH-type) family protein                                                                                                      | C3H          |
| AT1G22985 | Blue |                           | AP2 domain-containing transcription factor, putative                                                                                        | AP2-EREBP    |
| AT1G25470 | Blue |                           | AP2 domain-containing transcription factor, putative                                                                                        | AP2-EREBP    |
| AT1G27050 | Blue | ATHB54                    | ATHB54 (ARABIDOPSIS THALIANA HOMEBOX PROTEIN 54); nucleic acid binding / transcription factor                                               | HB           |
| AT1G27650 | Blue | ATU2AF35A                 | ATU2AF35A, ATU2AF35A; RNA binding                                                                                                           | C3H          |
| AT1G28050 | Blue | COL15                     | zinc finger (B-box type) family protein                                                                                                     | C2C2-CO-like |
| AT1G28520 | Blue | ATVOZ1, VOZ1              | unknown protein                                                                                                                             | VOZ          |
| AT1G29860 | Blue | ATWRKY71, WRKY71          | WRKY71 (WRKY DNA-binding protein 71); transcription factor                                                                                  | WRKY         |
| AT1G30650 | Blue | ATWRKY14, AR411, WRKY14   | WRKY14 (WRKY DNA-binding protein 14); transcription factor                                                                                  | WRKY         |
| AT1G30970 | Blue | SUF4                      | SUF4 (SUPPRESSOR OF FRIGIDA4), SUF4 (SUPPRESSOR OF FRIGIDA4); transcription factor                                                          | C2H2         |
| AT1G32800 | Blue |                           |                                                                                                                                             |              |
| AT1G34180 | Blue | ANAC016                   | ANAC016 (Arabidopsis NAC domain containing protein 16), ANAC016 (Arabidopsis NAC domain containing protein 16); transcription factor        | NAC          |
| AT1G34190 | Blue | ANAC017                   | ANAC017 (Arabidopsis NAC domain containing protein 17); transcription factor                                                                | NAC          |
| AT1G36060 | Blue |                           | AP2 domain-containing transcription factor, putative                                                                                        | AP2-EREBP    |
| AT1G43700 | Blue | AtbZIP51, VIP1            | VIP1 (VIRE2-INTERACTING PROTEIN 1); transcription factor                                                                                    | bZIP         |
| AT1G43850 | Blue | SEU                       | SEU (SEUSS); transcription cofactor, unknown protein                                                                                        |              |
| AT1G43860 | Blue |                           | transcription factor                                                                                                                        |              |
| AT1G48000 | Blue | ATMYB112                  | MYB112 (myb domain protein 112); DNA binding / transcription factor                                                                         | MYB          |
| AT1G48310 | Blue | CHR18, CHA18              | SNF2 domain-containing protein / helicase domain-containing protein                                                                         | SNF2         |
| AT1G49560 | Blue |                           | myb family transcription factor                                                                                                             | G2-like      |
| AT1G49720 | Blue | ABF1                      | ABF1 (ABSCISIC ACID RESPONSIVE ELEMENT-BINDING FACTOR 1); DNA binding / transcription factor/ transcriptional activator                     | bZIP         |
| AT1G50640 | Blue | ATERF3                    | ATERF3/ERF3 (ETHYLENE RESPONSIVE ELEMENT BINDING FACTOR 3); DNA binding / protein binding / transcription factor/ transcriptional repressor | AP2-EREBP    |
| AT1G51140 | Blue | bHLH122                   | basic helix-loop-helix (bHLH) family protein                                                                                                | bHLH         |
| AT1G51190 | Blue | PLT2                      | PLT2 (PLETHORA 2); transcription factor                                                                                                     | AP2-EREBP    |
| AT1G51600 | Blue | TIFY2A, ZML2              | ZML2 (ZIM-LIKE 2); transcription factor                                                                                                     | C2C2-GATA    |
| AT1G51950 | Blue | IAA18                     | IAA18 (indoleacetic acid-induced protein 18); transcription factor                                                                          | AUX/IAA      |
| AT1G53320 | Blue | AtTLP7                    | AtTLP7 (TUBBY LIKE PROTEIN 7); phosphoric diester hydrolase/ transcription factor                                                           | TUB          |
| AT1G55460 | Blue |                           | Kin17 DNA-binding protein-related                                                                                                           |              |
| AT1G55520 | Blue | ATTBP2, TBP2              | TBP2 (TATA binding protein 2); DNA binding / RNA polymerase II transcription factor                                                         |              |
| AT1G55580 | Blue | SCL18, LAS                | LAS (LATERAL SUPPRESSOR); transcription factor                                                                                              | GRAS         |
| AT1G56200 | Blue | EMB1303                   | EMB1303 (EMBRYO DEFECTIVE 1303)                                                                                                             |              |
| AT1G58100 | Blue | TCP8                      | TCP family transcription factor, putative                                                                                                   | TCP          |
| AT1G58330 | Blue | ZW2                       | ZW2                                                                                                                                         |              |
| AT1G59940 | Blue | ARR3                      | ARR3 (RESPONSE REGULATOR 3); transcription regulator/ two-component response regulator                                                      | Orphans      |
| AT1G62360 | Blue | WAM1, WAM, SHL, BUM1, STM | STM (SHOOT MERISTEMLESS); transcription factor                                                                                              | HB           |
| AT1G66340 | Blue | EIN1, ETR1                | ETR1 (ETHYLENE RESPONSE 1); two-component response regulator                                                                                | Orphans      |
| AT1G66350 | Blue | RGL1                      | RGL1 (RGA-LIKE 1); transcription factor                                                                                                     | GRAS         |

|           |      |                                    |                                                                                                         |             |                |
|-----------|------|------------------------------------|---------------------------------------------------------------------------------------------------------|-------------|----------------|
| AT1G66470 | Blue | bHLH083                            | basic helix-loop-helix (bHLH) family protein                                                            | bHLH        |                |
| AT1G66810 | Blue |                                    | zinc finger (CCCH-type) family protein                                                                  | C3H         |                |
| AT1G67970 | Blue | AT-HSFA8                           | AT-HSFA8 (Arabidopsis thaliana heat shock transcription factor A8); DNA binding / transcription factor  | HSF         |                |
| AT1G68150 | Blue | ATWRKY9, WRKY9                     | WRKY9 (WRKY DNA-binding protein 9); transcription factor                                                | WRKY        |                |
| AT1G68550 | Blue |                                    | AP2 domain-containing transcription factor, putative                                                    | AP2-EREBP   |                |
| AT1G69600 | Blue | ATHB29, ZFHD1                      | ATHB29/ZFHD1 (ZINC FINGER HOMEODOMAIN 1); DNA binding / transcription factor/ transcriptional activator | zf-HD       |                |
| AT1G71260 | Blue | WHY2, ATWHY2                       | ATWHY2 (A. THALIANA WHIRLY 2); DNA binding                                                              | PBF-2-like  |                |
| AT1G73100 | Blue | SDG19, SUVH3                       | SUVH3 (SU(VAR)3-9 HOMOLOG 3)                                                                            | SET         |                |
| AT1G74410 | Blue |                                    | zinc finger (C3HC4-type RING finger) family protein                                                     |             |                |
| AT1G74500 | Blue |                                    | bHLH family protein                                                                                     | bHLH        |                |
| AT1G75510 | Blue |                                    | transcription initiation factor IIF beta subunit (TFIIF-beta) family protein                            |             |                |
| AT1G75520 | Blue | SRS5                               | SRS5 (SHI-RELATED SEQUENCE 5)                                                                           | SRS         |                |
| AT1G76580 | Blue | SPL16                              | transcription factor                                                                                    |             |                |
| AT1G76710 | Blue | ASHH1, SDG26                       | SET domain-containing protein (ASHH1)                                                                   | SET         |                |
| AT1G79000 | Blue | ATHPCAT2, PCAT2, HAC1              | HAC1 (P300/CBP acetyltransferase-related protein 2 gene); transcription cofactor                        | TAZ         |                |
| AT2G01430 | Blue | ATHB17, ATHB-17                    | homeobox-leucine zipper protein 17 (HB-17) / HD-ZIP transcription factor 17                             | HB          |                |
| AT2G01810 | Blue |                                    | PHD finger family protein                                                                               | PHD         |                |
| AT2G02160 | Blue |                                    | zinc finger (CCCH-type) family protein                                                                  | C3H         |                |
| AT2G02740 | Blue | WHY3, ATWHY3, PTAC11               | ATWHY3/PTAC11 (A. THALIANA WHIRLY 3), ATWHY3/PTAC11 (A. THALIANA WHIRLY 3); DNA binding                 | PBF-2-like  |                |
| AT2G04890 | Blue | SCL21                              | SCL21 (SCARECROW-LIKE 21); transcription factor                                                         | GRAS        |                |
| AT2G17870 | Blue |                                    | cold-shock DNA-binding family protein                                                                   | CSD         |                |
| AT2G19610 | Blue |                                    | zinc finger (C3HC4-type RING finger) family protein                                                     |             |                |
| AT2G19640 | Blue | SDG39, ASHR2                       | SET domain-containing protein                                                                           |             |                |
| AT2G20280 | Blue |                                    | zinc finger (CCCH-type) family protein                                                                  | C3H         |                |
| AT2G21060 | Blue | ATGRP2B                            | ATGRP2B (GLYCINE-RICH PROTEIN 2B); nucleic acid binding                                                 | CSD         |                |
| AT2G21230 | Blue | AtbZIP30                           | bZIP family transcription factor, unknown protein                                                       | bZIP        |                |
| AT2G22300 | Blue | SR1, CAMTA3                        | ethylene-responsive calmodulin-binding protein, putative (SR1), unknown protein                         | CAMTA       |                |
| AT2G22430 | Blue | ATHB6                              | ATHB6 (ARABIDOPSIS THALIANA HOMEBOX PROTEIN 6); transcription factor                                    | HB          |                |
| AT2G22770 | Blue | NAI1, bHLH020                      | NAI1; DNA binding / transcription factor                                                                | bHLH        |                |
| AT2G23740 | Blue | AtCZS                              | nucleic acid binding / transcription factor/ zinc ion binding                                           | C2H2        |                |
| AT2G24500 | Blue | FZF                                | FZF; transcription factor                                                                               |             |                |
| AT2G25640 | Blue |                                    | unknown protein                                                                                         |             |                |
| AT2G27050 | Blue | EIL1                               | EIL1 (ETHYLENE-INSENSITIVE3-LIKE 1); transcription factor                                               | EIL         |                |
| AT2G27300 | Blue | NTL8, ANAC040                      | ANAC040 (Arabidopsis NAC domain containing protein 40); transcription factor                            | NAC         |                |
| AT2G28350 | Blue | ARF10                              | ARF10 (AUXIN RESPONSE FACTOR 10); miRNA binding / transcription factor                                  | ARF         | miR160,        |
| AT2G28450 | Blue |                                    | zinc finger (CCCH-type) family protein                                                                  | C3H         |                |
| AT2G28530 | Blue |                                    |                                                                                                         |             |                |
| AT2G30590 | Blue | WRKY21                             | WRKY21 (WRKY DNA-binding protein 21); transcription factor                                              | WRKY        |                |
| AT2G32600 | Blue |                                    | hydroxyproline-rich glycoprotein family protein                                                         |             |                |
| AT2G33610 | Blue | CHB2, ATSWI3B                      | ATSWI3B (Arabidopsis thaliana switching protein 3B); DNA binding                                        | MYB-related |                |
| AT2G34710 | Blue | ATHB14, PHB-1D, ATHB-14, PHB       | PHB (PHABULOSA); DNA binding / transcription factor                                                     | HB          | miR166/miR165, |
| AT2G35430 | Blue |                                    | zinc finger (CCCH-type) family protein                                                                  | C3H         |                |
| AT2G36010 | Blue | ATE2FA, E2F3                       | E2F3 (E2F TRANSCRIPTION FACTOR-3), E2F3 (E2F TRANSCRIPTION FACTOR-3); transcription factor              | E2F-DP      |                |
| AT2G36270 | Blue | EEL, GIA1, ABI5                    | ABI5 (ABA INSENSITIVE 5); DNA binding / transcription factor/ transcriptional activator                 | bZIP        |                |
| AT2G36930 | Blue |                                    | zinc finger (C2H2 type) family protein                                                                  |             |                |
| AT2G37150 | Blue |                                    | zinc finger (C3HC4-type RING finger) family protein                                                     |             |                |
| AT2G38950 | Blue |                                    | transcription factor jumonji (jmi) family protein / zinc finger (C5HC2 type) family protein             | Jumonji     |                |
| AT2G39100 | Blue |                                    | zinc finger (C3HC4-type RING finger) family protein                                                     |             |                |
| AT2G40220 | Blue | GIN6, SUN6, SIS5, SAN5, ISI3, ABI4 | ABI4 (ABA INSENSITIVE 4); DNA binding / transcription factor                                            | AP2-EREBP   |                |
| AT2G40820 | Blue |                                    | proline-rich family protein                                                                             | bHSH        |                |
| AT2G41310 | Blue | ARR8, ATRR3                        | ATRR3 (RESPONSE REGULATOR 3); transcription regulator                                                   | Orphans     |                |
| AT2G41630 | Blue | TFIIB                              | TFIIB (TRANSCRIPTION FACTOR II B); RNA polymerase II transcription factor                               |             |                |
| AT2G41900 | Blue |                                    | zinc finger (CCCH-type) family protein                                                                  | C3H         |                |
| AT2G41980 | Blue |                                    | seven in absentia (SINA) family protein                                                                 |             |                |

|           |      |                                         |                                                                                                                                    |              |
|-----------|------|-----------------------------------------|------------------------------------------------------------------------------------------------------------------------------------|--------------|
| AT2G42300 | Blue | bHLH048                                 | DNA binding / transcription factor, basic helix-loop-helix (bHLH) family protein                                                   | bHLH         |
| AT2G42400 | Blue | ATVOZ2, VOZ2                            | unknown protein                                                                                                                    | VOZ          |
| AT2G42660 | Blue |                                         | myb family transcription factor                                                                                                    | G2-like      |
| AT2G46040 | Blue |                                         | ARID/BRIGHT DNA-binding domain-containing protein / ELM2 domain-containing protein                                                 | ARID         |
| AT2G46310 | Blue | CRF5                                    | CRF5 (CYTOKININ RESPONSE FACTOR 5); DNA binding / transcription factor                                                             | AP2-EREBP    |
| AT2G46680 | Blue | ATHB7, ATHB-7                           | ATHB-7 (ARABIDOPSIS THALIANA HOMEBOX 7), ATHB-7 (ARABIDOPSIS THALIANA HOMEBOX 7); transcription factor                             | HB           |
| AT2G46730 | Blue | REM18                                   | pseudogene                                                                                                                         |              |
| AT2G47070 | Blue | SPL1                                    | SPL1 (SQUAMOSA PROMOTER BINDING PROTEIN-LIKE 1); DNA binding / transcription factor                                                | SBP          |
| AT2G47190 | Blue | AtMYB2                                  | MYB2 (myb domain protein 2); DNA binding / transcription factor                                                                    | MYB          |
| AT2G47520 | Blue |                                         | AP2 domain-containing transcription factor, putative                                                                               | AP2-EREBP    |
| AT2G47620 | Blue | CHB1, ATSWI3A                           | ATSWI3A (Arabidopsis thaliana switching protein 3A); DNA binding                                                                   | MYB-related  |
| AT2G47680 | Blue |                                         | zinc finger (CCCH type) helicase family protein                                                                                    | C3H          |
| AT2G48160 | Blue |                                         | PWWP domain-containing protein                                                                                                     |              |
| AT3G01970 | Blue | ATWRKY45, WRKY45                        | WRKY45 (WRKY DNA-binding protein 45); transcription factor                                                                         | WRKY         |
| AT3G02260 | Blue | CRM1, TIR3, LPR1, DOC1, ASA1, UMB1, BIG | BIG (DARK OVER-EXPRESSION OF CAB 1); binding / ubiquitin-protein ligase/ zinc ion binding                                          |              |
| AT3G02550 | Blue | LBD41                                   | LOB domain protein 41 / lateral organ boundaries domain protein 41 (LBD41)                                                         |              |
| AT3G02680 | Blue | ATNBS1, NBS1                            | NBS1 (NIJMEGEN BREAKAGE SYNDROME 1)                                                                                                | FHA          |
| AT3G03450 | Blue | RGL2                                    | RGL2 (RGA-LIKE 2); transcription factor                                                                                            | GRAS         |
| AT3G04580 | Blue | EIN4                                    | EIN4 (ETHYLENE INSENSITIVE 4), EIN4 (ETHYLENE INSENSITIVE 4); receptor                                                             | Orphans      |
| AT3G04590 | Blue |                                         | DNA-binding family protein                                                                                                         |              |
| AT3G05760 | Blue |                                         | nucleic acid binding / zinc ion binding                                                                                            |              |
| AT3G07260 | Blue |                                         | forkhead-associated domain-containing protein / FHA domain-containing protein                                                      | FHA          |
| AT3G07650 | Blue | COL9                                    | COL9 (CONSTANS-LIKE 9); transcription factor/ zinc ion binding, COL9 (CONSTANS-LIKE 9); zinc ion binding, unknown protein          | C2C2-CO-like |
| AT3G10030 | Blue |                                         | aspartate/glutamate/uridylylate kinase family protein                                                                              | Trihelix     |
| AT3G10490 | Blue | ANAC051, ANAC052                        | ANAC051/ANAC052 (Arabidopsis NAC domain containing protein 51, Arabidopsis NAC domain containing protein 52); transcription factor | NAC          |
| AT3G12250 | Blue | BZIP45, TGA6                            | TGA6 (TGA1a-related gene 6), TGA6 (TGA1a-related gene 6); DNA binding / transcription factor                                       | bZIP         |
| AT3G12270 | Blue | ATPRMT3                                 | methyltransferase                                                                                                                  |              |
| AT3G14180 | Blue |                                         | transcription factor                                                                                                               | Trihelix     |
| AT3G15540 | Blue | MSG2, IAA19                             | IAA19 (indoleacetic acid-induced protein 19); transcription factor                                                                 | AUX/IAA      |
| AT3G16870 | Blue |                                         | zinc finger (GATA type) family protein                                                                                             | C2C2-GATA    |
| AT3G16940 | Blue |                                         | calmodulin-binding protein                                                                                                         | CAMTA        |
| AT3G18400 | Blue | ANAC058                                 | ANAC058 (Arabidopsis NAC domain containing protein 58); transcription factor                                                       | NAC          |
| AT3G19210 | Blue | ATRAD54, CHR25                          | ATRAD54/CHR25 (ARABIDOPSIS HOMOLOG OF RAD54); ATP binding / DNA binding / helicase                                                 | SNF2         |
| AT3G19360 | Blue |                                         | zinc finger (CCCH-type) family protein                                                                                             | C3H          |
| AT3G19860 | Blue | bHLH121                                 | DNA binding, basic helix-loop-helix (bHLH) family protein                                                                          | bHLH         |
| AT3G19910 | Blue |                                         | zinc finger (C3HC4-type RING finger) family protein                                                                                |              |
| AT3G20770 | Blue | EIN3                                    | EIN3 (ETHYLENE-INSENSITIVE3); transcription factor                                                                                 | EIL          |
| AT3G20840 | Blue | PLT1                                    | PLT1 (PLETHORA 1); transcription factor                                                                                            | AP2-EREBP    |
| AT3G21175 | Blue | TIFY2B, ZML1                            | ZML1 (ZIM-LIKE 1); transcription factor, unknown protein                                                                           | C2C2-GATA    |
| AT3G21270 | Blue | ADOF2, AtDof3. 1                        | ADOF2 (Arabidopsis dof zinc finger protein 2); DNA binding / transcription factor                                                  | C2C2-Dof     |
| AT3G22780 | Blue | ATTSO1, TSO1                            | TSO1 (CHINESE FOR "UGLY"); transcription factor                                                                                    | CPP          |
| AT3G23050 | Blue | AXR2, IAA7                              | IAA7 (AUXIN RESISTANT 2), IAA7 (AUXIN RESISTANT 2); transcription factor                                                           | AUX/IAA      |
| AT3G23060 | Blue |                                         | zinc finger (C3HC4-type RING finger) family protein                                                                                |              |
| AT3G24520 | Blue | AT-HSFC1                                | AT-HSFC1 (Arabidopsis thaliana heat shock transcription factor C1); DNA binding / transcription factor                             | HSF          |
| AT3G26640 | Blue | LWD2                                    | transducin family protein / WD-40 repeat family protein                                                                            |              |
| AT3G27700 | Blue |                                         | RNA recognition motif (RRM)-containing protein                                                                                     | C3H          |
| AT3G42670 | Blue | CLSY, CHR38                             | CHR38 (chromatin remodeling 38); ATP binding / DNA binding / helicase                                                              | SNF2         |
| AT3G42790 | Blue | AL3                                     | PHD finger family protein                                                                                                          | Alfin-like   |
| AT3G44750 | Blue | HDT1, HDA3, ATHD2A, HD2A                | HD2A (HISTONE DEACETYLASE 2A); nucleic acid binding / zinc ion binding                                                             |              |
| AT3G46640 | Blue | PCL1, LUX                               | PCL1 (PHYTOCLOCK 1); DNA binding, PCL1 (PHYTOCLOCK 1); DNA binding / transcription factor                                          | G2-like      |
| AT3G47120 | Blue |                                         | RNA recognition motif (RRM)-containing protein                                                                                     | C3H          |
| AT3G47890 | Blue |                                         | ubiquitin carboxyl-terminal hydrolase-related                                                                                      |              |

|           |      |                              |                                                                                                 |             |
|-----------|------|------------------------------|-------------------------------------------------------------------------------------------------|-------------|
| AT3G50750 | Blue |                              | brassinosteroid signalling positive regulator-related                                           | BES1        |
| AT3G50870 | Blue | HAN, MNP                     | MNP (MONOPOLE); transcription factor                                                            | C2C2-GATA   |
| AT3G54280 | Blue | RGD3, ATBTAF1, CHR16, CHA16  | ATP binding / DNA binding / helicase                                                            | SNF2        |
| AT3G54620 | Blue | BZO2H4, ATBZIP25             | BZO2H4 (basic leucine zipper O2 homolog 4); transcription factor, unknown protein               | bZIP        |
| AT3G54810 | Blue | BME3, BME3-ZF                | BME3/BME3-ZF (BLUE MICROPLYLAR END3); transcription factor                                      | C2C2-GATA   |
| AT3G55730 | Blue | ATMYB109                     | MYB109 (myb domain protein 109); DNA binding / transcription factor                             | MYB         |
| AT3G55770 | Blue |                              | LIM domain-containing protein, zinc ion binding                                                 | LIM         |
| AT3G57150 | Blue | ATNAP57, ATCBF5, NAP57       | NAP57 (ARABIDOPSIS THALIANA HOMOLOGUE OF NAP57)                                                 |             |
| AT3G57390 | Blue | AGL18                        | AGL18 (AGAMOUS-LIKE 18); transcription factor                                                   | MADS        |
| AT3G58630 | Blue |                              | transcription factor                                                                            | Trihelix    |
| AT3G61630 | Blue | CRF6                         | CRF6 (CYTOKININ RESPONSE FACTOR 6); DNA binding / transcription factor                          | AP2-EREBP   |
| AT3G63070 | Blue |                              | PWWP domain-containing protein                                                                  |             |
| AT4G00200 | Blue |                              | DNA binding                                                                                     |             |
| AT4G00940 | Blue | AtDof4,1                     | Dof-type zinc finger domain-containing protein                                                  | C2C2-Dof    |
| AT4G01120 | Blue | ATBZIP54, GBF2               | GBF2 (G-BOX BINDING FACTOR 2); DNA binding / transcription factor                               | bZIP        |
| AT4G01280 | Blue |                              | DNA binding / transcription factor, myb family transcription factor                             | MYB-related |
| AT4G09460 | Blue | ATMYB6, ATMYB8               | ATMYB6 (myb domain protein 6, myb domain protein 8); DNA binding / transcription factor         | MYB         |
| AT4G10350 | Blue | NST4, ANAC070                | ANAC070 (Arabidopsis NAC domain containing protein 70); transcription factor                    | NAC         |
| AT4G10940 | Blue |                              | PHD finger family protein                                                                       |             |
| AT4G14720 | Blue | TIFY4B, PPD2                 | PPD2 (PEAPOD 2)                                                                                 | ZIM         |
| AT4G15420 | Blue |                              | PRLI-interacting factor K                                                                       |             |
| AT4G16110 | Blue | ARR2                         | ARR2 (ARABIDOPSIS RESPONSE REGULATOR 2); transcription factor/ two-component response regulator | ARR-B       |
| AT4G16150 | Blue |                              | calmodulin-binding protein                                                                      | CAMTA       |
| AT4G16850 | Blue |                              | unknown protein                                                                                 |             |
| AT4G17020 | Blue |                              | transcription factor-related                                                                    |             |
| AT4G17230 | Blue | SCL13                        | SCL13 (SCARECROW-LIKE 13); transcription factor                                                 | GRAS        |
| AT4G17570 | Blue |                              | zinc finger (GATA type) family protein                                                          | C2C2-GATA   |
| AT4G17785 | Blue | ATMYB39                      | myb family transcription factor (MYB39)                                                         | MYB         |
| AT4G17950 | Blue |                              | DNA-binding family protein                                                                      |             |
| AT4G19990 | Blue | FRS1                         | FRS1 (FAR1-related sequence 1); zinc ion binding                                                | Orphans     |
| AT4G22250 | Blue |                              | zinc finger (C3HC4-type RING finger) family protein                                             |             |
| AT4G23860 | Blue |                              | PHD finger protein-related, protein binding / ubiquitin-protein ligase/ zinc ion binding        |             |
| AT4G24440 | Blue |                              | transcription initiation factor IIA gamma chain / TFIIA-gamma (TFIIA-S)                         |             |
| AT4G24470 | Blue | TIFY1, ZIM                   | ZIM (ZINC-FINGER PROTEIN EXPRESSED IN INFLORESCENCE MERISTEM); transcription factor             | C2C2-GATA   |
| AT4G25320 | Blue |                              | DNA-binding protein-related                                                                     |             |
| AT4G28610 | Blue | ATPHR1, PHR1                 | PHR1 (PHOSPHATE STARVATION RESPONSE 1); transcription factor                                    | G2-like     |
| AT4G29000 | Blue |                              | tesmin/TSO1-like CXC domain-containing protein                                                  | CPP         |
| AT4G30860 | Blue | SDG4, ASHR3                  | SET domain-containing protein                                                                   | SET         |
| AT4G30930 | Blue | WRKY32, NFD1                 | NFD1 (NUCLEAR FUSION DEFECTIVE 1); structural constituent of ribosome                           |             |
| AT4G31420 | Blue |                              | zinc finger (C2H2 type) family protein                                                          |             |
| AT4G32010 | Blue | HSL1, HSI2-L1, VAL2          | transcriptional factor B3 family protein                                                        | ABI3VP1     |
| AT4G32040 | Blue | KNAT5                        | KNAT5 (KNOTTED1-LIKE HOMEODOMAIN GENE 5); transcription factor                                  | HB          |
| AT4G32570 | Blue | TIFY8                        | unknown protein                                                                                 | ZIM         |
| AT4G32730 | Blue | ATMYB3R-1, PC-MYB1, ATMYB3R1 | PC-MYB1 (myb domain protein 3R1); DNA binding / transcription factor                            | MYB         |
| AT4G32890 | Blue |                              | zinc finger (GATA type) family protein                                                          | C2C2-GATA   |
| AT4G36020 | Blue | CSDP1                        | CSDP1 (COLD SHOCK DOMAIN PROTEIN 1); nucleic acid binding                                       | CSD         |
| AT4G36260 | Blue | SRS2, STY2                   | STY2 (STYLISH 2)                                                                                | SRS         |
| AT4G36740 | Blue | HB-5, ATHB40                 | ATHB40 (ARABIDOPSIS THALIANA HOMEODOMAIN PROTEIN 40); DNA binding / transcription factor        | HB          |
| AT4G36780 | Blue |                              | brassinosteroid signalling positive regulator-related                                           | BES1        |
| AT4G36900 | Blue | RAP2.10                      | RAP2.10 (related to AP2 10); DNA binding / transcription factor                                 | AP2-EREBP   |
| AT4G37180 | Blue |                              | myb family transcription factor                                                                 | G2-like     |
| AT4G38960 | Blue |                              | zinc finger (B-box type) family protein, zinc ion binding                                       | Orphans     |
| AT4G39070 | Blue |                              | zinc finger (B-box type) family protein                                                         | Orphans     |
| AT4G39100 | Blue | SHL1                         | SHL1 (SHORT LIFE)                                                                               | PHD         |
| AT4G39160 | Blue |                              | DNA binding / transcription factor                                                              | MYB-related |

|           |       |                                      |                                                                                                             |              |
|-----------|-------|--------------------------------------|-------------------------------------------------------------------------------------------------------------|--------------|
| AT5G01160 | Blue  |                                      | e-cadherin binding protein-related                                                                          |              |
| AT5G04100 | Blue  |                                      |                                                                                                             |              |
| AT5G04110 | Blue  |                                      | DNA topoisomerase II family protein                                                                         | MYB-related  |
| AT5G04760 | Blue  |                                      | myb family transcription factor                                                                             | MYB          |
| AT5G05130 | Blue  |                                      | SNF2 domain-containing protein / helicase domain-containing protein / RING finger domain-containing protein | SNF2         |
| AT5G06160 | Blue  | ATO                                  | splicing factor-related                                                                                     |              |
| AT5G06550 | Blue  |                                      | unknown protein                                                                                             | Jumonji      |
| AT5G07060 | Blue  |                                      | zinc finger (CCCH-type) family protein                                                                      | C3H          |
| AT5G07310 | Blue  |                                      | AP2 domain-containing transcription factor, putative                                                        | AP2-EREBP    |
| AT5G10280 | Blue  | ATMYB92, AtMYB64                     | MYB92 (myb domain protein 92); DNA binding / transcription factor                                           | MYB          |
| AT5G10380 | Blue  | RING1                                | zinc finger (C3HC4-type RING finger) family protein                                                         |              |
| AT5G10720 | Blue  | CKI2, AHK5                           | AHK5 (CYTOKININ INDEPENDENT 2)                                                                              | Orphans      |
| AT5G12310 | Blue  |                                      | zinc finger (C3HC4-type RING finger) family protein                                                         |              |
| AT5G13820 | Blue  | HPPBF-1, ATTBP1, ATBP-1, ATBP1, TBP1 | TBP1 (TELOMERIC DNA BINDING PROTEIN 1); DNA binding                                                         |              |
| AT5G16070 | Blue  |                                      | chaperonin, putative                                                                                        |              |
| AT5G16470 | Blue  |                                      | zinc finger (C2H2 type) family protein                                                                      |              |
| AT5G17430 | Blue  | BBM                                  | ovule development protein, putative                                                                         | AP2-EREBP    |
| AT5G17800 | Blue  | ATMYB56                              | AtMYB56 (myb domain protein 56); DNA binding / transcription factor                                         | MYB          |
| AT5G18560 | Blue  | PUCHI                                | AP2 domain-containing transcription factor, putative                                                        | AP2-EREBP    |
| AT5G19280 | Blue  | RAG1, KAPP                           | KAPP (Kinase-associated protein phosphatase); protein phosphatase type 2C                                   | FHA          |
| AT5G22290 | Blue  | FAN, ANAC089                         | ANAC089 (Arabidopsis NAC domain containing protein 89); transcription factor                                | NAC          |
| AT5G22480 | Blue  |                                      | zinc finger (ZPR1-type) family protein                                                                      |              |
| AT5G22750 | Blue  | RAD5                                 | RAD5; ATP binding / DNA binding / helicase / protein binding / zinc ion binding                             | SNF2         |
| AT5G23405 | Blue  |                                      | high mobility group (HMG1/2) family protein                                                                 | HMG          |
| AT5G25475 | Blue  |                                      | DNA binding                                                                                                 |              |
| AT5G25830 | Blue  |                                      | zinc finger (GATA type) family protein                                                                      | C2C2-GATA    |
| AT5G35770 | Blue  | SAP                                  | SAP (STERILE APETALA); transcription factor                                                                 | SAP          |
| AT5G37020 | Blue  | ARF8                                 | ARF8 (AUXIN RESPONSE FACTOR 8), ARF8 (AUXIN RESPONSE FACTOR 8); transcription factor                        | ARF          |
| AT5G42820 | Blue  | ATU2AF35B                            | ATU2AF35B; RNA binding                                                                                      | C3H          |
| AT5G43170 | Blue  | AZF3                                 | AZF3 (ARABIDOPSIS ZINC-FINGER PROTEIN 3); nucleic acid binding / transcription factor / zinc ion binding    | C2H2         |
| AT5G43700 | Blue  | IAA4, ATAUX2-11                      | ATAUX2-11 (indoleacetic acid-induced protein 4); transcription factor                                       | AUX/IAA      |
| AT5G45420 | Blue  |                                      | myb family transcription factor                                                                             | MYB          |
| AT5G46640 | Blue  |                                      | DNA-binding family protein                                                                                  |              |
| AT5G47370 | Blue  | HAT2                                 | HAT2; transcription factor                                                                                  | HB           |
| AT5G48250 | Blue  | COL10                                | zinc finger (B-box type) family protein                                                                     | C2C2-CO-like |
| AT5G48655 | Blue  |                                      | zinc finger (C3HC4-type RING finger) family protein                                                         |              |
| AT5G49700 | Blue  |                                      | DNA-binding protein-related                                                                                 |              |
| AT5G51230 | Blue  | CYR1, VEF2, EMF2                     | EMF2 (EMBRYONIC FLOWER 2); transcription factor, unknown protein                                            |              |
| AT5G51980 | Blue  |                                      | WD-40 repeat family protein / zfw2 protein (ZFW2), putative, nucleic acid binding                           | C3H          |
| AT5G52660 | Blue  |                                      | myb family transcription factor                                                                             | MYB-related  |
| AT5G53950 | Blue  | CUC2, ANAC098                        | CUC2 (CUP-SHAPED COTYLEDON 2); transcription factor                                                         | NAC          |
| AT5G56900 | Blue  |                                      | CwfJ-like family protein / zinc finger (CCCH-type) family protein                                           | C3H          |
| AT5G59950 | Blue  |                                      | RNA and export factor-binding protein, putative, unknown protein                                            |              |
| AT5G60410 | Blue  | ATSIZ1, SIZ1                         | ATSIZ1/SIZ1; DNA binding, ATSIZ1/SIZ1; DNA binding / SUMO ligase, unknown protein                           | PHD          |
| AT5G60850 | Blue  | OBP4, AtDof5. 4                      | OBP4 (OBF BINDING PROTEIN 4); DNA binding / transcription factor                                            | C2C2-Dof     |
| AT5G61190 | Blue  |                                      | zinc finger protein-related                                                                                 |              |
| AT5G61770 | Blue  | PPAN                                 | brix domain-containing protein                                                                              |              |
| AT5G63280 | Blue  |                                      | zinc finger (C2H2 type) family protein                                                                      | C2H2         |
| AT5G63420 | Blue  | EMB2746                              | EMB2746 (EMBRYO DEFECTIVE 2746); catalytic                                                                  | Trihelix     |
| AT5G66055 | Blue  | EMB2036, AKRP                        | AKRP/EMB2036 (EMBRYO DEFECTIVE 2036); protein binding                                                       |              |
| AT5G66730 | Blue  |                                      | zinc finger (C2H2 type) family protein                                                                      | C2H2         |
| AT5G67190 | Blue  |                                      | AP2 domain-containing transcription factor, putative                                                        | AP2-EREBP    |
| AT5G67300 | Blue  | ATMYB44, AtMYBr1                     | AtMYB44/AtMYBr1 (myb domain protein 44, myb domain protein r1); DNA binding / transcription factor          | MYB          |
| AT1G01520 | Brown |                                      | myb family transcription factor                                                                             | MYB-related  |
| AT1G01720 | Brown | ATAF1, ANAC002                       | ATAF1 (Arabidopsis NAC domain containing protein 2); transcription factor                                   | NAC          |

|            |       |                                  |                                                                                                      |             |                |
|------------|-------|----------------------------------|------------------------------------------------------------------------------------------------------|-------------|----------------|
| AT1G03790  | Brown | SOM                              | zinc finger (CCCH-type) family protein                                                               | C3H         |                |
| AT1G04990  | Brown |                                  | zinc finger (CCCH-type) family protein                                                               | C3H         |                |
| AT1G07360  | Brown |                                  | zinc finger (CCCH-type) family protein / RNA recognition motif (RRM)-containing protein              | C3H         |                |
| AT1G07980  | Brown | NF-YC10                          | histone-like transcription factor (CBF/NF-Y) family protein                                          | CCAAT       |                |
| AT1G09530  | Brown | POC1, PAP3, PIF3                 | PIF3 (PHYTOCHROME INTERACTING FACTOR 3); DNA binding / transcription factor/ transcription regulator | bHLH        |                |
| AT1G09950  | Brown |                                  | transcription factor-related                                                                         |             |                |
| AT1G10170  | Brown | ATNFXL1                          | NF-X1 type zinc finger family protein                                                                |             |                |
| AT1G11020  | Brown |                                  | zinc finger (C3HC4-type RING finger) family protein                                                  |             |                |
| AT1G12040  | Brown | LRX1                             | LRX1 (LEUCINE-RICH REPEAT/EXTENSIN 1); protein binding / structural constituent of cell wall         |             |                |
| AT1G15580  | Brown | ATAUX2-27, IAA5                  | IAA5 (indoleacetic acid-induced protein 5); transcription factor                                     | AUX/IAA     |                |
| AT1G17460  | Brown | TRFL3                            | TRFL3 (TRF-LIKE 3); DNA binding / transcription factor                                               | MYB-related |                |
| AT1G20980  | Brown | ATSPL14, SPL1R2, FBR6, SPL14     | SPL14 (SQUAMOSA PROMOTER BINDING PROTEIN-LIKE 14); DNA binding / transcription factor                | SBP         |                |
| AT1G21000  | Brown |                                  | unknown protein, zinc-binding family protein                                                         | PLATZ       |                |
| AT1G21340  | Brown | AtDof1,2                         | Dof-type zinc finger domain-containing protein                                                       | C2C2-Dof    |                |
| AT1G21450  | Brown | SCL1                             | SCL1 (SCARECROW-LIKE 1); transcription factor                                                        | GRAS        |                |
| AT1G21910  | Brown |                                  | AP2 domain-containing transcription factor family protein                                            | AP2-EREBP   |                |
| AT1G22190  | Brown |                                  | AP2 domain-containing transcription factor, putative                                                 | AP2-EREBP   |                |
| AT1G23420  | Brown | INO, YAB4                        | INO (INNER NO OUTER); transcription factor                                                           | C2C2-YABBY  |                |
| AT1G25280  | Brown | AtTLP10                          | AtTLP10 (TUBBY LIKE PROTEIN 10); phosphoric diester hydrolase/ transcription factor, unknown protein | TUB         |                |
| AT1G26870  | Brown | FEZ, ANAC009                     | ANAC009 (Arabidopsis NAC domain containing protein 9); transcription factor                          | NAC         |                |
| AT1G32870  | Brown | ANAC13, ANAC013                  | ANAC013 (Arabidopsis NAC domain containing protein 13); transcription factor, unknown protein        | NAC         |                |
| AT1G33280  | Brown | ANAC015, NST5                    | ANAC015 (Arabidopsis NAC domain containing protein 15); transcription factor                         | NAC         |                |
| AT1G33420  | Brown |                                  | PHD finger family protein                                                                            | PHD         |                |
| AT1G34360  | Brown |                                  | translation initiation factor 3 (IF-3) family protein                                                |             |                |
| AT1G34370  | Brown | STOP1                            | nucleic acid binding / zinc ion binding, zinc finger (C2H2 type) family protein                      | C2H2        |                |
| AT1G35460  | Brown | bHLH080                          | basic helix-loop-helix (bHLH) family protein                                                         | bHLH        |                |
| AT1G42990  | Brown | AtBZIP60                         | ATBZIP60 (BASIC REGION/LEUCINE ZIPPER MOTIF 60); DNA binding / transcription factor                  | bZIP        |                |
| AT1G44830  | Brown |                                  | AP2 domain-containing transcription factor TINY, putative                                            | AP2-EREBP   |                |
| AT1G44900  | Brown |                                  | ATP binding / DNA binding / DNA-dependent ATPase                                                     |             |                |
| AT1G46768  | Brown | RAP2.1                           | RAP2.1 (related to AP2 1); DNA binding / transcription factor                                        | AP2-EREBP   |                |
| AT1G47270  | Brown | AtTLP6                           | AtTLP6 (TUBBY LIKE PROTEIN 6); phosphoric diester hydrolase/ transcription factor                    | TUB         |                |
| AT1G50670  | Brown |                                  | OTU-like cysteine protease family protein                                                            |             |                |
| AT1G54330  | Brown | ANAC020                          | ANAC020 (Arabidopsis NAC domain containing protein 20); transcription factor                         | NAC         |                |
| AT1G54690  | Brown | HTA3, G-H2AX, GAMMA-H2AX, H2AXB  | histone H2A, putative                                                                                | CCAAT       |                |
| AT1G59640  | Brown | ZCW32, bHLH031, BPE, BPEUB, BPEP | ZCW32 (BIGPETAL, BIGPETALUB); DNA binding / transcription factor                                     | bHLH        |                |
| AT1G62300  | Brown | ATWRKY6, WRKY6                   | WRKY6 (WRKY DNA-binding protein 6); transcription factor                                             | WRKY        |                |
| AT1G63040  | Brown |                                  | pseudogene                                                                                           |             |                |
| AT1G63840  | Brown |                                  | zinc finger (C3HC4-type RING finger) family protein                                                  |             |                |
| AT1G64380  | Brown |                                  | AP2 domain-containing transcription factor, putative                                                 | AP2-EREBP   |                |
| AT1G65040  | Brown |                                  | protein binding / zinc ion binding, unknown protein                                                  |             |                |
| AT1G66390  | Brown | PAP2, AtMYB90                    | PAP2 (PRODUCTION OF ANTHOCYANIN PIGMENT 2); DNA binding / transcription factor                       | MYB         |                |
| AT1G668320 | Brown | BW62C, BW62B, AtMYB62            | MYB62 (myb domain protein 62); DNA binding / transcription factor                                    | MYB         |                |
| AT1G66890  | Brown |                                  | pseudogene                                                                                           |             |                |
| AT1G69170  | Brown | SPL6                             | squamosa promoter-binding protein-like 6 (SPL6)                                                      | SBP         | miR156/miR157, |
| AT1G70460  | Brown |                                  | protein kinase, putative                                                                             |             |                |
| AT1G72175  | Brown |                                  | zinc finger (C3HC4-type RING finger) family protein                                                  |             |                |
| AT1G72570  | Brown |                                  | DNA binding / transcription factor                                                                   | AP2-EREBP   |                |
| AT1G73230  | Brown |                                  | nascent polypeptide-associated complex (NAC) domain-containing protein                               |             |                |
| AT1G74250  | Brown |                                  | DNAJ heat shock N-terminal domain-containing protein                                                 |             |                |
| AT1G74370  | Brown |                                  | zinc finger (C3HC4-type RING finger) family protein                                                  |             |                |
| AT1G75340  | Brown |                                  | zinc finger (CCCH-type) family protein                                                               | C3H         |                |
| AT1G76590  | Brown |                                  | zinc-binding family protein                                                                          | PLATZ       |                |
| AT1G77450  | Brown | ANAC032                          | ANAC032 (Arabidopsis NAC domain containing protein 32); transcription factor                         | NAC         |                |
| AT1G77570  | Brown | HSFA5-like                       | DNA binding / transcription factor                                                                   | HSF         |                |

|           |       |                        |                                                                                                                                                                                      |              |
|-----------|-------|------------------------|--------------------------------------------------------------------------------------------------------------------------------------------------------------------------------------|--------------|
| AT1G77640 | Brown |                        | AP2 domain-containing transcription factor, putative                                                                                                                                 | AP2-EREBP    |
| AT1G78080 | Brown | CAF1, RAP2.4           | RAP2.4 (related to AP2 4); DNA binding / transcription factor                                                                                                                        | AP2-EREBP    |
| AT1G78600 | Brown | STH3, LZFI             | zinc finger (B-box type) family protein                                                                                                                                              | Orphans      |
| AT1G79580 | Brown | ANAC033, SMB, NST6     | ANAC033, ANAC033; transcription factor                                                                                                                                               | NAC          |
| AT1G80400 | Brown |                        | zinc finger (C3HC4-type RING finger) family protein                                                                                                                                  |              |
| AT1G80840 | Brown | ATWRKY40, WRKY40       | WRKY40 (WRKY DNA-binding protein 40); transcription factor                                                                                                                           | WRKY         |
| AT2G01060 | Brown |                        | myb family transcription factor                                                                                                                                                      | G2-like      |
| AT2G01200 | Brown | IAA32, MEE10           | IAA32 (indoleacetic acid-induced protein 32, maternal effect embryo arrest 10), IAA32 (indoleacetic acid-induced protein 32, maternal effect embryo arrest 10); transcription factor |              |
| AT2G07677 | Brown |                        | pseudogene                                                                                                                                                                           |              |
| AT2G18760 | Brown | CHR8                   | CHR8 (chromatin remodeling 8); ATP binding / DNA binding / helicase                                                                                                                  | SNF2         |
| AT2G21050 | Brown |                        | amino acid permease, putative                                                                                                                                                        |              |
| AT2G23320 | Brown | WRKY15                 | WRKY15 (WRKY DNA-binding protein 15); transcription factor                                                                                                                           | WRKY         |
| AT2G24570 | Brown | ATWRKY17, WRKY17       | WRKY17 (WRKY DNA-binding protein 17); transcription factor                                                                                                                           | WRKY         |
| AT2G25000 | Brown | ATWRKY60, WRKY60       | WRKY60 (WRKY DNA-binding protein 60); transcription factor                                                                                                                           | WRKY         |
| AT2G28710 | Brown |                        | zinc finger (C2H2 type) family protein                                                                                                                                               | C2H2         |
| AT2G30250 | Brown | ATWRKY25, WRKY25       | WRKY25 (WRKY DNA-binding protein 25); transcription factor                                                                                                                           | WRKY         |
| AT2G31370 | Brown | AtbZIP59, PosF21       | DNA binding / transcription factor, bZIP transcription factor (POSF21)                                                                                                               | bZIP         |
| AT2G32930 | Brown | ZFN2                   | ZFN2 (ZINC FINGER PROTEIN 2); nucleic acid binding                                                                                                                                   | C3H          |
| AT2G33710 | Brown |                        | AP2 domain-containing transcription factor family protein                                                                                                                            | AP2-EREBP    |
| AT2G35550 | Brown | BPC7, BBR/BPC7, ATBPC7 | ATBPC7/BBR/BPC7/BPC7 (BASIC PENTACYSSTEINE 7), ATBPC7/BBR/BPC7/BPC7 (BASIC PENTACYSSTEINE 7); DNA binding / transcription factor                                                     | BBR/BPC      |
| AT2G35910 | Brown |                        | zinc finger (C3HC4-type RING finger) family protein                                                                                                                                  |              |
| AT2G37430 | Brown | ZAT11                  | zinc finger (C2H2 type) family protein (ZAT11)                                                                                                                                       | C2H2         |
| AT2G38250 | Brown |                        | DNA-binding protein-related                                                                                                                                                          | Trihelix     |
| AT2G38340 | Brown |                        | AP2 domain-containing transcription factor, putative (DRE2B)                                                                                                                         | AP2-EREBP    |
| AT2G38470 | Brown | ATWRKY33, WRKY33       | WRKY33 (WRKY DNA-binding protein 33); transcription factor                                                                                                                           | WRKY         |
| AT2G40350 | Brown |                        | DNA binding / transcription factor                                                                                                                                                   | AP2-EREBP    |
| AT2G40470 | Brown | LBD15                  | LOB domain protein 15 / lateral organ boundaries domain protein 15 (LBD15)                                                                                                           |              |
| AT2G40950 | Brown | BZIP17                 | bZIP transcription factor family protein                                                                                                                                             | bZIP         |
| AT2G41710 | Brown |                        | ovule development protein, putative                                                                                                                                                  | AP2-EREBP    |
| AT2G42360 | Brown |                        | zinc finger (C3HC4-type RING finger) family protein                                                                                                                                  |              |
| AT2G42430 | Brown | ASL18, LBD16           | LBD16 (ASYMMETRIC LEAVES2-LIKE18)                                                                                                                                                    |              |
| AT2G42680 | Brown | MBF1A, ATMBF1A         | ATMBF1A/MBF1A (MULTIPROTEIN BRIDGING FACTOR 1A); DNA binding / transcription coactivator                                                                                             | MBF1         |
| AT2G43000 | Brown | ANAC042                | ANAC042 (Arabidopsis NAC domain containing protein 42); transcription factor                                                                                                         | NAC          |
| AT2G47260 | Brown | ATWRKY23, WRKY23       | WRKY23 (WRKY DNA-binding protein 23); transcription factor                                                                                                                           | WRKY         |
| AT2G47850 | Brown |                        | zinc finger (CCCH-type) family protein                                                                                                                                               | C3H          |
| AT2G47890 | Brown | COL13                  | zinc finger (B-box type) family protein                                                                                                                                              | C2C2-CO-like |
| AT3G01330 | Brown | E2FF, E2L2, DEL3       | DEL3 (DP-E2F-like 3); transcription factor                                                                                                                                           | E2F-DP       |
| AT3G01560 | Brown |                        | proline-rich family protein                                                                                                                                                          |              |
| AT3G02990 | Brown | ATHSFA1E               | ATHSFA1E (Arabidopsis thaliana heat shock transcription factor A1E); DNA binding / transcription factor                                                                              | HSF          |
| AT3G03660 | Brown | WOX11                  | DNA binding / transcription factor, unknown protein                                                                                                                                  | HB           |
| AT3G05400 | Brown |                        | sugar transporter, putative                                                                                                                                                          |              |
| AT3G06410 | Brown |                        | nucleic acid binding                                                                                                                                                                 | C3H          |
| AT3G07610 | Brown | IBM1                   | transcription factor jumonji (jmjC) domain-containing protein                                                                                                                        | Jumonji      |
| AT3G10500 | Brown | ANAC053                | ANAC053 (Arabidopsis NAC domain containing protein 53); transcription factor                                                                                                         | NAC          |
| AT3G11020 | Brown | DREB2B                 | DREB2B (DRE-binding protein 2B); DNA binding / transcription factor/ transcriptional activator                                                                                       | AP2-EREBP    |
| AT3G11200 | Brown | AL2                    | PHD finger family protein                                                                                                                                                            | Alfin-like   |
| AT3G11580 | Brown |                        | DNA-binding protein, putative                                                                                                                                                        | ABI3VP1      |
| AT3G12280 | Brown | RBL1, RBR1             | RBR1 (RETINOBLASTOMA-RELATED 1)                                                                                                                                                      | RB           |
| AT3G13350 | Brown |                        | high mobility group (HMG1/2) family protein / ARID/BRIGHT DNA-binding domain-containing protein                                                                                      | ARID         |
| AT3G13445 | Brown | TFIID-1, TBP1          | TBP1 (TRANSCRIPTION FACTOR IID-1); DNA binding / RNA polymerase II transcription factor                                                                                              |              |
| AT3G14880 | Brown |                        | unknown protein                                                                                                                                                                      |              |
| AT3G18290 | Brown | EMB2454                | EMB2454 (EMBRYO DEFECTIVE 2454); protein binding / zinc ion binding                                                                                                                  |              |
| AT3G20880 | Brown |                        | zinc finger (C2H2 type) protein (WIP4)                                                                                                                                               | C2H2         |



|           |       |                        |                                                                                                                                           |           |         |
|-----------|-------|------------------------|-------------------------------------------------------------------------------------------------------------------------------------------|-----------|---------|
| AT3G23250 | Brown | ATMYB15, ATY19         | AtMYB15/AtY19/MYB15 (myb domain protein 15); DNA binding, AtMYB15/AtY19/MYB15 (myb domain protein 15); DNA binding / transcription factor | MYB       |         |
| AT3G28210 | Brown | PMZ                    | PMZ; zinc ion binding                                                                                                                     |           |         |
| AT3G30530 | Brown | ATBZIP42               | bZIP transcription factor family protein                                                                                                  | bZIP      |         |
| AT3G44350 | Brown | ANAC061                | ANAC061 (Arabidopsis NAC domain containing protein 61); transcription factor, unknown protein                                             | NAC       |         |
| AT3G47640 | Brown | bHLH047                | basic helix-loop-helix (bHLH) family protein                                                                                              | bHLH      |         |
| AT3G50410 | Brown | OBP1, AtDof3. 4        | OBP1 (OBF BINDING PROTEIN 1); DNA binding / transcription factor                                                                          | C2C2-Dof  |         |
| AT3G55560 | Brown | AGF2                   | DNA-binding protein-related                                                                                                               |           |         |
| AT3G56980 | Brown | ORG3, bHLH039          | ORG3 (OBP3-responsive gene 3); DNA binding / transcription factor                                                                         | bHLH      |         |
| AT3G57670 | Brown | NTT                    | zinc finger (C2H2 type) protein (WIP2)                                                                                                    | C2H2      |         |
| AT3G58680 | Brown | MBF1B, ATMBF1B         | ATMBF1B/MBF1B (MULTIPROTEIN BRIDGING FACTOR 1B); DNA binding / transcription coactivator                                                  | MBF1      |         |
| AT4G00335 | Brown | RHB1A                  | RHB1A (RING-H2 finger B1A); protein binding / zinc ion binding                                                                            |           |         |
| AT4G00850 | Brown | GIF3                   | GIF3 (GRF1-INTERACTING FACTOR 3)                                                                                                          |           |         |
| AT4G01550 | Brown | ANAC069, NTM2          | ANAC069 (Arabidopsis NAC domain containing protein 69), ANAC069 (Arabidopsis NAC domain containing protein 69); transcription factor      | NAC       |         |
| AT4G01720 | Brown | ATWRKY47, WRKY47       | WRKY47 (WRKY DNA-binding protein 47); transcription factor                                                                                | WRKY      |         |
| AT4G02540 | Brown |                        | DC1 domain-containing protein                                                                                                             |           |         |
| AT4G02560 | Brown | LD                     | LD (LUMINIDEPENDENS); transcription factor                                                                                                | HB        |         |
| AT4G05100 | Brown | ATMYB74                | AtMYB74 (myb domain protein 74); DNA binding / transcription factor                                                                       | MYB       |         |
| AT4G12240 | Brown |                        | zinc finger (C2H2 type) family protein                                                                                                    | C2H2      |         |
| AT4G12620 | Brown | ORC1B, ATORC1B, UNE13  | ATORC1B/ORC1B/UNE13 (ORIGIN OF REPLICATION COMPLEX 1B, unfertilized embryo sac 13); DNA binding / PHD protein binding                     |           |         |
| AT4G13130 | Brown |                        | DC1 domain-containing protein                                                                                                             |           |         |
| AT4G14560 | Brown | AXR5, IAA1             | IAA1 (INDOLE-3-ACETIC ACID INDUCIBLE); transcription factor                                                                               | AUX/IAA   |         |
| AT4G17750 | Brown | ATHSFA1A, ATHSF1, HSF1 | HSF1 (ARABIDOPSIS HEAT SHOCK FACTOR 1); DNA binding / transcription factor                                                                | HSF       |         |
| AT4G17980 | Brown | ANAC071                | ANAC071 (Arabidopsis NAC domain containing protein 71); transcription factor                                                              | NAC       |         |
| AT4G18880 | Brown | AT-HSFA4A              | AT-HSFA4A (Arabidopsis thaliana heat shock transcription factor A4A); DNA binding / transcription factor                                  | HSF       |         |
| AT4G18890 | Brown |                        | brassinosteroid signalling positive regulator-related                                                                                     | BES1      |         |
| AT4G19660 | Brown | NPR4                   | NPR4 (NPR1-LIKE PROTEIN 4); protein binding                                                                                               |           |         |
| AT4G22770 | Brown |                        | DNA-binding family protein                                                                                                                |           |         |
| AT4G23750 | Brown | CRF2                   | CRF2 (CYTOKININ RESPONSE FACTOR 2); DNA binding / transcription factor                                                                    | AP2-EREBP |         |
| AT4G24150 | Brown | ATGRF8                 | AtGRF8 (GROWTH-REGULATING FACTOR 8)                                                                                                       | GRF       | miR396, |
| AT4G25990 | Brown | CIL                    | CIL                                                                                                                                       | Orphans   |         |
| AT4G26120 | Brown |                        | ankyrin repeat family protein / BTB/POZ domain-containing protein                                                                         |           |         |
| AT4G30080 | Brown | ARF16                  | ARF16 (AUXIN RESPONSE FACTOR 16); miRNA binding / transcription factor                                                                    | ARF       | miR160, |
| AT4G31000 | Brown |                        | calmodulin-binding protein                                                                                                                |           |         |
| AT4G31550 | Brown | ATWRKY11, WRKY11       | WRKY11 (WRKY DNA-binding protein 11); transcription factor                                                                                | WRKY      |         |
| AT4G31800 | Brown | ATWRKY18, WRKY18       | WRKY18 (WRKY DNA-binding protein 18); transcription factor                                                                                | WRKY      |         |
| AT4G32280 | Brown | IAA29                  | IAA29 (indoleacetic acid-induced protein 29); transcription factor                                                                        | AUX/IAA   |         |
| AT4G34990 | Brown | ATMYB32                | AtMYB32 (myb domain protein 32); DNA binding / transcription factor                                                                       | MYB       |         |
| AT4G37130 | Brown |                        | hydroxyproline-rich glycoprotein family protein                                                                                           |           |         |
| AT4G38900 | Brown | AtbZIP29               | DNA binding, bZIP protein                                                                                                                 | bZIP      |         |
| AT4G39780 | Brown |                        | AP2 domain-containing transcription factor, putative                                                                                      | AP2-EREBP |         |
| AT5G01380 | Brown |                        | transcription factor                                                                                                                      | Trihelix  |         |
| AT5G01960 | Brown |                        | zinc finger (C3HC4-type RING finger) family protein                                                                                       |           |         |
| AT5G04410 | Brown | NAC2, ANAC078          | NAC2 (Arabidopsis NAC domain containing protein 78); transcription factor                                                                 | NAC       |         |
| AT5G09240 | Brown |                        | transcriptional coactivator p15 (PC4) family protein                                                                                      |           |         |
| AT5G09330 | Brown | ANAC082                | ANAC082 (Arabidopsis NAC domain containing protein 82), ANAC082 (Arabidopsis NAC domain containing protein 82); transcription factor      | NAC       |         |
| AT5G10510 | Brown | PLT3, AIL6             | AIL6 (AINTEGUMENTA-LIKE 6); DNA binding / transcription factor, unknown protein                                                           | AP2-EREBP |         |
| AT5G14000 | Brown | ANAC084                | ANAC084 (Arabidopsis NAC domain containing protein 84); transcription factor                                                              | NAC       |         |
| AT5G14960 | Brown | DEL2, E2L1, E2FD       | DEL2/E2FD/E2L1 (DP-E2F-LIKE 2); DNA binding / transcription factor                                                                        | E2F-DP    |         |
| AT5G15160 | Brown |                        | bHLH family protein                                                                                                                       |           |         |
| AT5G18450 | Brown |                        | AP2 domain-containing transcription factor, putative                                                                                      | AP2-EREBP |         |
| AT5G18550 | Brown |                        | nucleic acid binding                                                                                                                      | C3H       |         |

|           |            |                                     |                                                                                                                                    |              |                |
|-----------|------------|-------------------------------------|------------------------------------------------------------------------------------------------------------------------------------|--------------|----------------|
| AT5G20510 | Brown      | AL5                                 | PHD finger family protein                                                                                                          | Alfin-like   |                |
| AT5G20910 | Brown      |                                     | zinc finger (C3HC4-type RING finger) family protein                                                                                |              |                |
| AT5G24330 | Brown      | SDG34, ATXR6                        | ATXR6 (Arabidopsis thaliana Trithorax- related protein 6); DNA binding                                                             | PHD          |                |
| AT5G24800 | Brown      | BZO2H2, ATBZIP9                     | BZO2H2 (basic leucine zipper O2 homolog 2); DNA binding / transcription factor                                                     | bZIP         |                |
| AT5G25190 | Brown      |                                     | ethylene-responsive element-binding protein, putative                                                                              | AP2-EREBP    |                |
| AT5G26930 | Brown      |                                     | zinc finger (GATA type) family protein                                                                                             | C2C2-GATA    |                |
| AT5G40880 | Brown      |                                     | WD-40 repeat family protein / zfw3 protein (ZFW3)                                                                                  | C3H          |                |
| AT5G41350 | Brown      |                                     | zinc finger (C3HC4-type RING finger) family protein                                                                                |              |                |
| AT5G44260 | Brown      |                                     | zinc finger (CCCH-type) family protein                                                                                             | C3H          |                |
| AT5G46350 | Brown      | ATWRKY8, WRKY8                      | WRKY8 (WRKY DNA-binding protein 8); transcription factor                                                                           | WRKY         |                |
| AT5G48150 | Brown      | PAT1                                | PAT1 (PHYTOCHROME A SIGNAL TRANSDUCTION 1); transcription factor                                                                   | GRAS         |                |
| AT5G49520 | Brown      | ATWRKY48, WRKY48                    | WRKY48 (WRKY DNA-binding protein 48); transcription factor                                                                         | WRKY         |                |
| AT5G50570 | Brown      | SPL13                               | squamosa promoter-binding protein, putative                                                                                        | SBP          | miR156/miR157, |
| AT5G51240 | Brown      |                                     |                                                                                                                                    |              |                |
| AT5G51590 | Brown      |                                     | DNA-binding protein-related                                                                                                        |              |                |
| AT5G52830 | Brown      | ATWRKY27, WRKY27                    | WRKY27 (WRKY DNA-binding protein 27); transcription factor                                                                         | WRKY         |                |
| AT5G54070 | Brown      | AT-HSFA9                            | AT-HSFA9 (Arabidopsis thaliana heat shock transcription factor A9); DNA binding / transcription factor                             | HSF          |                |
| AT5G57420 | Brown      | IAA33                               | IAA33 (indoleacetic acid-induced protein 33); transcription factor                                                                 |              |                |
| AT5G58610 | Brown      |                                     | PHD finger transcription factor, putative                                                                                          | PHD          |                |
| AT5G59000 | Brown      |                                     | zinc finger (C3HC4-type RING finger) family protein                                                                                |              |                |
| AT5G60100 | Brown      | APRR3                               | APRR3 (PSEUDO-RESPONSE REGULATOR 3); transcription regulator                                                                       | Pseudo ARR-B |                |
| AT5G61890 | Brown      |                                     | AP2 domain-containing transcription factor family protein                                                                          | AP2-EREBP    |                |
| AT5G63780 | Brown      | SHA1                                | zinc finger (C3HC4-type RING finger) family protein                                                                                |              |                |
| AT5G63790 | Brown      | ANAC102                             | ANAC102 (Arabidopsis NAC domain containing protein 102); transcription factor                                                      | NAC          |                |
| AT5G64060 | Brown      | ANAC103                             | ANAC103 (Arabidopsis NAC domain containing protein 103); transcription factor                                                      | NAC          |                |
| AT5G64980 | Brown      |                                     | unknown protein                                                                                                                    |              |                |
| AT5G65080 | Brown      | AGL68, MAF5.2, MAF5                 | MAF5 (MADS AFFECTING FLOWERING 5); transcription factor                                                                            | MADS         |                |
| AT5G66750 | Brown      | CHR01, CHA1, SOM1, CHR1, SOM4, DDM1 | DDM1 (DECREASED DNA METHYLATION 1); helicase                                                                                       | SNF2         |                |
| AT5G67480 | Brown      | ATBT4, BT4                          | BT4 (BTB AND TAZ DOMAIN PROTEIN 4); protein binding, BT4 (BTB AND TAZ DOMAIN PROTEIN 4); protein binding / transcription regulator | TAZ          |                |
| AT5G67580 | Brown      | ATTPB3, TRB2, ATTRB2                | ATTRB2/TRB2 (TELOMERE REPEAT BINDING FACTOR 2); DNA binding / transcription factor                                                 | MYB-related  |                |
| AT1G17920 | Cyan       | HDG12                               | HDG12 (HOMEODOMAIN GLABROUS12); transcription factor                                                                               | HB           |                |
| AT2G24740 | Cyan       | SUVH8, SDG21                        | SDG21 (SET DOMAIN GROUP 21)                                                                                                        | SET          |                |
| AT2G27100 | Cyan       | SE                                  | SE (SERRATE); transcription factor                                                                                                 |              |                |
| AT2G27470 | Cyan       | NF-YB11                             | CCAAT-box binding transcription factor subunit HAP3-related                                                                        | CCAAT        |                |
| AT2G35700 | Cyan       | ATERF38                             | AP2 domain-containing transcription factor, putative                                                                               | AP2-EREBP    |                |
| AT3G02790 | Cyan       |                                     | zinc finger (C2H2 type) family protein                                                                                             |              |                |
| AT3G20010 | Cyan       |                                     | SNF2 domain-containing protein / helicase domain-containing protein / RING finger domain-containing protein                        | SNF2         |                |
| AT4G11660 | Cyan       | AT-HSFB2B, HSF2B                    | AT-HSFB2B (Arabidopsis thaliana heat shock transcription factor B2B); transcription factor                                         | HSF          |                |
| AT4G21550 | Cyan       | HSI2-L2, VAL3                       | transcriptional factor B3 family protein                                                                                           | ABI3VP1      |                |
| AT4G26920 | Cyan       |                                     | unknown protein                                                                                                                    |              |                |
| AT5G07040 | Cyan       |                                     | zinc finger (C3HC4-type RING finger) family protein                                                                                |              |                |
| AT5G12840 | Cyan       | NF-YA1, ATHAP2A, HAP2A, EMB2220     | HAP2A (EMBRYO DEFECTIVE 2220); transcription factor                                                                                | CCAAT        | miR169,        |
| AT1G33240 | Darkgreen  | AT-GTL2, AT-GTL1                    | AT-GTL1 (Arabidopsis thaliana GT2-like 1); transcription factor                                                                    | Trihelix     |                |
| AT3G21810 | Darkgreen  |                                     | zinc finger (CCCH-type) family protein                                                                                             | C3H          |                |
| AT4G17695 | Darkgreen  | KAN3, KANADI3                       | KAN3 (KANADI 3); DNA binding / transcription factor                                                                                | G2-like      |                |
| AT5G38840 | Darkgreen  |                                     | forkhead-associated domain-containing protein / FHA domain-containing protein                                                      | FHA          |                |
| AT1G08880 | Darkgrey   | HTA5, G-H2AX, GAMMA-H2AX, H2AXA     | histone H2A, putative                                                                                                              | CCAAT        |                |
| AT1G75390 | Darkgrey   | ATBZIP44                            | bZIP transcription factor family protein                                                                                           | bZIP         |                |
| AT1G79350 | Darkorange | EMB1135                             | EMB1135 (EMBRYO DEFECTIVE 1135); DNA binding                                                                                       | PHD          |                |
| AT2G31630 | Darkorange | TRX1,                               |                                                                                                                                    |              |                |
| AT3G01460 | Darkorange | MBD9                                | MBD9 (METHYL-CPG-BINDING DOMAIN 9); DNA binding                                                                                    | PHD          |                |
| AT5G25150 | Darkorange | TAF5                                | nucleotide binding                                                                                                                 |              |                |
| AT1G24260 | Darkred    | 3-Sep, AGL9, SEP3                   | SEP3 (SEPALATA3); transcription factor                                                                                             | MADS         |                |

|           |               |                              |                                                                                                                                     |           |                |
|-----------|---------------|------------------------------|-------------------------------------------------------------------------------------------------------------------------------------|-----------|----------------|
| AT3G10800 | Darkred       | BZIP28                       | bZIP transcription factor family protein                                                                                            | bZIP      |                |
| AT4G17710 | Darkred       | HDG4                         | homeobox-leucine zipper family protein / lipid-binding START domain-containing protein                                              | HB        |                |
| AT1G30330 | Darkturquoise | ARF6                         | ARF6 (AUXIN RESPONSE FACTOR 6), ARF6 (AUXIN RESPONSE FACTOR 6); transcription factor                                                | ARF       | miR167,        |
| AT1G30810 | Darkturquoise |                              | transcription factor jumonji (jmi) family protein / zinc finger (C5HC2 type) family protein                                         | Jumonji   |                |
| AT1G57820 | Darkturquoise | ORTH2, VIM1                  | VIM1 (VARIANT IN METHYLATION 1); DNA binding                                                                                        |           |                |
| AT3G51470 | Darkturquoise |                              | protein phosphatase 2C, putative / PP2C, putative                                                                                   | DBP       |                |
| AT4G16430 | Darkturquoise | bHLH003                      | basic helix-loop-helix (bHLH) family protein                                                                                        | bHLH      |                |
| AT5G06770 | Darkturquoise |                              | KH domain-containing protein / zinc finger (CCCH type) family protein                                                               | C3H       |                |
| AT1G01010 | Green         | ANAC001                      | ANAC001 (Arabidopsis NAC domain containing protein 1); transcription factor                                                         | NAC       |                |
| AT1G01920 | Green         |                              | SET domain-containing protein                                                                                                       | SET       |                |
| AT1G04240 | Green         | IAA3, SHY2                   | SHY2 (SHORT HYPOCOTYL 2); transcription factor                                                                                      | AUX/IAA   |                |
| AT1G05050 | Green         |                              |                                                                                                                                     |           |                |
| AT1G05710 | Green         | bHLH153                      | ethylene-responsive protein, putative                                                                                               |           |                |
| AT1G07470 | Green         |                              | transcription factor IIA large subunit, putative / TFIIA large subunit, putative                                                    |           |                |
| AT1G10480 | Green         | ZFP5                         | ZFP5 (ZINC FINGER PROTEIN 5); nucleic acid binding / transcription factor/ zinc ion binding                                         | C2H2      |                |
| AT1G11100 | Green         |                              | SNF2 domain-containing protein / helicase domain-containing protein / zinc finger protein-related                                   | SNF2      |                |
| AT1G12630 | Green         |                              | DNA binding / transcription factor/ transcriptional activator                                                                       | AP2-EREBP |                |
| AT1G12880 | Green         | ATNUDT12                     | ATNUDT12 (Arabidopsis thaliana Nudix hydrolase homolog 12); hydrolase                                                               |           |                |
| AT1G13400 | Green         | JGL, NUB                     | JGL/NUB (NUBBIN); nucleic acid binding / zinc ion binding                                                                           |           |                |
| AT1G13450 | Green         |                              | DNA binding protein GT-1, unknown protein                                                                                           | Trihelix  |                |
| AT1G13960 | Green         | WRKY4                        | WRKY4 (WRKY DNA-binding protein 4); transcription factor                                                                            | WRKY      |                |
| AT1G15100 | Green         | RHA2A                        | RHA2A (RING-H2 finger A2A); protein binding / zinc ion binding                                                                      |           |                |
| AT1G16640 | Green         |                              | transcriptional factor B3 family protein                                                                                            | ABI3VP1   |                |
| AT1G18570 | Green         | HIG1, BW51B, BW51A, AtMYB51  | MYB51 (myb domain protein 51); DNA binding / transcription factor                                                                   | MYB       |                |
| AT1G19850 | Green         | IAA24, ARF5, MP              | MP (MONOPTEROS); transcription factor                                                                                               | ARF       |                |
| AT1G20693 | Green         | HMGBETA1, NFD2, NFD02, HMGB2 | HMGB2 (HIGH MOBILITY GROUP B 2), HMGB2 (HIGH MOBILITY GROUP B 2); transcription factor                                              | HMG       |                |
| AT1G20696 | Green         | NFD3, NFD03, HMGB3           | HMGB3 (HIGH MOBILITY GROUP B 3), HMGB3 (HIGH MOBILITY GROUP B 3); transcription factor                                              | HMG       |                |
| AT1G20910 | Green         |                              | ARID/BRIGHT DNA-binding domain-containing protein                                                                                   | ARID      |                |
| AT1G21160 | Green         |                              | translation initiation factor                                                                                                       |           |                |
| AT1G22490 | Green         | bHLH094                      | basic helix-loop-helix (bHLH) family protein                                                                                        | bHLH      |                |
| AT1G25560 | Green         | TEM1                         | AP2 domain-containing transcription factor, putative                                                                                | AP2-EREBP |                |
| AT1G25580 | Green         | ANAC008                      | ANAC008 (Arabidopsis NAC domain containing protein 8); transcription factor                                                         | NAC       |                |
| AT1G26580 | Green         |                              | unknown protein                                                                                                                     |           |                |
| AT1G26800 | Green         |                              | zinc finger (C3HC4-type RING finger) family protein                                                                                 |           |                |
| AT1G27360 | Green         | SPL11                        | squamosa promoter-binding protein-like 11 (SPL11)                                                                                   | SBP       | miR156/miR157, |
| AT1G27370 | Green         | SPL10                        | DNA binding, squamosa promoter-binding protein-like 10 (SPL10)                                                                      | SBP       | miR156/miR157, |
| AT1G29280 | Green         | ATWRKY65, WRKY65             | WRKY65 (WRKY DNA-binding protein 65); transcription factor                                                                          | WRKY      |                |
| AT1G29950 | Green         |                              | transcription factor/ transcription regulator, unknown protein                                                                      |           |                |
| AT1G30490 | Green         | ATHB9, PHV                   | PHV (PHAVOLUTA); DNA binding / transcription factor                                                                                 | HB        | miR166/miR165, |
| AT1G31320 | Green         | LBD4                         | LOB domain protein 4 / lateral organ boundaries domain protein 4 (LBD4)                                                             |           |                |
| AT1G32330 | Green         | ATHSFA1D                     | ATHSFA1D (Arabidopsis thaliana heat shock transcription factor A1D); DNA binding / transcription factor                             | HSF       |                |
| AT1G43770 | Green         |                              | PHD finger family protein, unknown protein                                                                                          | PHD       |                |
| AT1G47870 | Green         | ATE2FC, ATE2F2, E2FC         | E2FC (ARABIDOPSIS HOMOLOG OF E2F C); transcription factor                                                                           | E2F-DP    |                |
| AT1G49850 | Green         |                              | zinc finger (C3HC4-type RING finger) family protein                                                                                 |           |                |
| AT1G50410 | Green         |                              | SNF2 domain-containing protein / helicase domain-containing protein / RING finger domain-containing protein                         | SNF2      |                |
| AT1G50420 | Green         | SCL-3, SCL3                  | SCL3 (SCARECROW-LIKE 3); transcription factor                                                                                       | GRAS      |                |
| AT1G52150 | Green         | ATHB15, ICU4, CNA, ATHB-15   | ATHB-15 (INCURVATA 4), ATHB-15 (INCURVATA 4); DNA binding / transcription factor                                                    | HB        | miR166/miR165, |
| AT1G52450 | Green         |                              | ubiquitin carboxyl-terminal hydrolase-related                                                                                       |           |                |
| AT1G61140 | Green         | EDA16                        | EDA16 (embryo sac development arrest 16); ATP binding / DNA binding / helicase/ protein binding / zinc ion binding, unknown protein | SNF2      |                |
| AT1G63490 | Green         |                              | transcription factor jumonji (jmiC) domain-containing protein                                                                       | Jumonji   |                |
| AT1G64105 | Green         | ANAC027                      | ANAC027 (Arabidopsis NAC domain containing protein 27); transcription factor                                                        | NAC       |                |
| AT1G64620 | Green         | AtDof1,8                     | Dof-type zinc finger domain-containing protein                                                                                      | C2C2-Dof  |                |
| AT1G68240 | Green         | bHLH109                      | transcription factor, unknown protein                                                                                               | bHLH      |                |
| AT1G68360 | Green         |                              | zinc finger protein-related                                                                                                         |           |                |

|           |       |                               |                                                                                                           |             |         |
|-----------|-------|-------------------------------|-----------------------------------------------------------------------------------------------------------|-------------|---------|
| AT1G68920 | Green | bHLH049                       | basic helix-loop-helix (bHLH) family protein                                                              | bHLH        |         |
| AT1G69310 | Green | ATWRKY57, WRKY57              | WRKY57 (WRKY DNA-binding protein 57); transcription factor                                                | WRKY        |         |
| AT1G69330 | Green |                               | zinc finger (C3HC4-type RING finger) family protein                                                       |             |         |
| AT1G69810 | Green | ATWRKY36, WRKY36              | WRKY36 (WRKY DNA-binding protein 36); transcription factor                                                | WRKY        |         |
| AT1G70000 | Green |                               | DNA-binding family protein                                                                                | MYB-related |         |
| AT1G72050 | Green |                               | zinc finger (C2H2 type) family protein                                                                    | C2H2        |         |
| AT1G72650 | Green | TRFL6                         | TRFL6 (TRF-LIKE 6); DNA binding / transcription factor                                                    | MYB-related |         |
| AT1G72740 | Green |                               | DNA-binding family protein / histone H1/H5 family protein                                                 | MYB-related |         |
| AT1G73730 | Green | SLIM1, EIL3                   | EIL3 (ETHYLENE-INSENSITIVE3-LIKE3); transcription factor                                                  | EIL         |         |
| AT1G73950 | Green |                               | zinc finger (C3HC4-type RING finger) family protein                                                       |             |         |
| AT1G74660 | Green | MIF1                          | MIF1 (MINI ZINC FINGER 1); DNA binding / transcription factor                                             | zf-HD       |         |
| AT1G75540 | Green | STH2                          | zinc finger (B-box type) family protein                                                                   | Orphans     |         |
| AT1G77800 | Green |                               | PHD finger family protein                                                                                 | PHD         |         |
| AT1G77920 | Green |                               | bZIP family transcription factor                                                                          | bZIP        |         |
| AT1G78280 | Green |                               | transcription factor jumonji (jnjC) domain-containing protein                                             | Jumonji     |         |
| AT1G79700 | Green |                               | ovule development protein, putative                                                                       | AP2-EREBP   |         |
| AT2G01650 | Green | PUX2                          | PUX2 (PLANT UBX DOMAIN-CONTAINING PROTEIN 2); nucleic acid binding / zinc ion binding                     |             |         |
| AT2G02090 | Green | CHA19, ETL1, CHR19            | CHR19/ETL1 (chromatin remodeling 19); ATP binding / DNA binding / helicase                                | SNF2        |         |
| AT2G13370 | Green | CHR5                          | CHR5 (chromatin remodeling 5); ATP binding / DNA binding / chromatin binding / helicase                   | SNF2        |         |
| AT2G15580 | Green |                               | zinc finger (C3HC4-type RING finger) family protein                                                       |             |         |
| AT2G17150 | Green | NLP1                          | RWP-RK domain-containing protein                                                                          | RWP-RK      |         |
| AT2G17410 | Green |                               | ARID/BRIGHT DNA-binding domain-containing protein                                                         | ARID        |         |
| AT2G18060 | Green | ANAC037, VND1                 | VND1 (VASCULAR RELATED NAC-DOMAIN PROTEIN 1); transcription factor                                        | NAC         |         |
| AT2G18090 | Green |                               | PHD finger family protein / SWIB complex BAF60b domain-containing protein / GYF domain-containing protein |             |         |
| AT2G18120 | Green | SRS4                          | SRS4 (SHI-RELATED SEQUENCE 4)                                                                             | SRS         |         |
| AT2G18750 | Green |                               | calmodulin binding, calmodulin-binding protein                                                            |             |         |
| AT2G20400 | Green |                               | myb family transcription factor                                                                           | G2-like     |         |
| AT2G27230 | Green | LHW, bHLH156                  | transcription factor-related                                                                              |             |         |
| AT2G27760 | Green | IPPT, ATIPT2                  | ATIPT2 (TRNA ISOPENTENYLTRANSFERASE)                                                                      |             |         |
| AT2G27980 | Green |                               | protein binding / zinc ion binding                                                                        |             |         |
| AT2G28510 | Green | AtDof2.1                      | Dof-type zinc finger domain-containing protein                                                            | C2C2-Dof    |         |
| AT2G29580 | Green |                               | zinc finger (CCCH-type) family protein / RNA recognition motif (RRM)-containing protein                   | C3H         |         |
| AT2G31730 | Green |                               | ethylene-responsive protein, putative                                                                     |             |         |
| AT2G33310 | Green | IAA13                         | IAA13 (indoleacetic acid-induced protein 13); transcription factor, unknown protein                       | AUX/IAA     |         |
| AT2G33620 | Green |                               | DNA-binding family protein / AT-hook protein 1 (AHP1), unknown protein                                    |             |         |
| AT2G34140 | Green | AtDof2. 3                     | Dof-type zinc finger domain-containing protein                                                            | C2C2-Dof    |         |
| AT2G34450 | Green |                               | high mobility group (HMG1/2) family protein                                                               | HMG         |         |
| AT2G36720 | Green |                               | PHD finger transcription factor, putative                                                                 | PHD         |         |
| AT2G37520 | Green |                               | PHD finger family protein                                                                                 | PHD         |         |
| AT2G37590 | Green | AtDof2. 4                     | Dof-type zinc finger domain-containing protein                                                            | C2C2-Dof    |         |
| AT2G38090 | Green |                               | myb family transcription factor                                                                           | MYB         |         |
| AT2G39880 | Green | ATMYB25                       | MYB25 (myb domain protein 25); DNA binding / transcription factor                                         | MYB         |         |
| AT2G40140 | Green | ATSZF2, CZF1, ZFAR1           | CZF1/ZFAR1, CZF1/ZFAR1; transcription factor                                                              | C3H         |         |
| AT2G42280 | Green | bHLH130                       | basic helix-loop-helix (bHLH) family protein                                                              | bHLH        |         |
| AT2G44980 | Green |                               | transcription regulatory protein SNF2, putative                                                           | SNF2        |         |
| AT2G46870 | Green | NGA1                          | NGA1 (NGATHA1); transcription factor                                                                      | ABI3VP1     |         |
| AT2G47080 | Green |                               |                                                                                                           |             |         |
| AT2G47270 | Green | bHLH151                       | transcription factor/ transcription regulator                                                             |             |         |
| AT2G47460 | Green | PGF1, ATMYB12                 | MYB12 (myb domain protein 12); DNA binding / transcription factor/ transcriptional activator              | MYB         | miR858, |
| AT2G47900 | Green | AtTLP3                        | AtTLP3 (TUBBY LIKE PROTEIN 3); phosphoric diester hydrolase/ transcription factor                         | TUB         |         |
| AT2G48100 | Green |                               | exonuclease, exonuclease family protein                                                                   | C2H2        |         |
| AT3G01470 | Green | HD-ZIP-1, HAT5, ATHB1, ATHB-1 | ATHB-1 (Homeobox-leucine zipper protein HAT5); transcription factor                                       | HB          |         |
| AT3G03550 | Green |                               | zinc finger (C3HC4-type RING finger) family protein                                                       |             |         |
| AT3G04570 | Green |                               | DNA-binding protein-related                                                                               |             |         |
| AT3G04670 | Green | ATWRKY39, WRKY39              | WRKY39 (WRKY DNA-binding protein 39); transcription factor                                                | WRKY        |         |

|           |       |                            |                                                                                                                                                  |           |                |
|-----------|-------|----------------------------|--------------------------------------------------------------------------------------------------------------------------------------------------|-----------|----------------|
| AT3G04730 | Green | IAA16                      | IAA16 (indoleacetic acid-induced protein 16); transcription factor                                                                               | AUX/IAA   |                |
| AT3G05670 | Green |                            | PHD finger family protein                                                                                                                        | PHD       |                |
| AT3G14230 | Green | RAP2.2                     | RAP2.2; DNA binding / transcription factor                                                                                                       | AP2-EREBP |                |
| AT3G16720 | Green | ATL2                       | ATL2 (Arabidopsis T <sup>?</sup> xicos en Levadura 2); protein binding / zinc ion binding                                                        |           |                |
| AT3G16857 | Green | ARR1                       | ARR1 (ARABIDOPSIS RESPONSE REGULATOR 1); transcription factor/ two-component response regulator                                                  | ARR-B     |                |
| AT3G19510 | Green | HAT3.1                     | homeobox protein (HAT 3.1)                                                                                                                       | HB        |                |
| AT3G20280 | Green |                            | PHD finger family protein                                                                                                                        | PHD       |                |
| AT3G23030 | Green | IAA2                       | IAA2 (indoleacetic acid-induced protein 2); transcription factor                                                                                 | AUX/IAA   |                |
| AT3G23150 | Green | ETR2                       | ETR2 (ETHYLENE RESPONSE 2); receptor                                                                                                             | Orphans   |                |
| AT3G23690 | Green | bHLH077                    | basic helix-loop-helix (bHLH) family protein                                                                                                     | bHLH      | miR393,        |
| AT3G24120 | Green |                            | myb family transcription factor                                                                                                                  | G2-like   |                |
| AT3G25730 | Green |                            | AP2 domain-containing transcription factor, putative                                                                                             | AP2-EREBP |                |
| AT3G25790 | Green |                            | myb family transcription factor                                                                                                                  | G2-like   |                |
| AT3G26730 | Green |                            | zinc finger (C3HC4-type RING finger) family protein                                                                                              |           |                |
| AT3G27010 | Green | PCF1, AT-TCP20             | AT-TCP20 ("Arabidopsis thaliana teosinte branched 1, cycloidea, PCF (TCP)-domain family protein 20"); transcription factor                       | TCP       |                |
| AT3G29330 | Green |                            | unknown protein                                                                                                                                  |           |                |
| AT3G42860 | Green |                            | zinc knuckle (CCHC-type) family protein                                                                                                          | Orphans   |                |
| AT3G43240 | Green |                            | ARID/BRIGHT DNA-binding domain-containing protein                                                                                                | ARID      |                |
| AT3G46600 | Green |                            | scarecrow transcription factor family protein                                                                                                    | GRAS      |                |
| AT3G47990 | Green |                            | zinc finger (C3HC4-type RING finger) family protein                                                                                              |           |                |
| AT3G48100 | Green | ATRR2, IBC6, ARR5          | ARR5 (ARABIDOPSIS RESPONSE REGULATOR 5); transcription regulator/ two-component response regulator                                               | Orphans   |                |
| AT3G50260 | Green | CEJ1, ATERF#011            | ATERF#011/CEJ1 (COOPERATIVELY REGULATED BY ETHYLENE AND JASMONATE 1); DNA binding / transcription factor                                         | AP2-EREBP |                |
| AT3G50700 | Green | ATIDD2                     | ATIDD2 (ARABIDOPSIS THALIANA INDETERMINATE(ID)-DOMAIN 2); nucleic acid binding / transcription factor/ zinc ion binding                          | C2H2      |                |
| AT3G55080 | Green |                            | SET domain-containing protein                                                                                                                    | SET       |                |
| AT3G56400 | Green | ATWRKY70, WRKY70           | WRKY70 (WRKY DNA-binding protein 70); transcription factor                                                                                       | WRKY      |                |
| AT3G57300 | Green | ATINO80                    | transcriptional activator, putative                                                                                                              | SNF2      |                |
| AT3G58710 | Green | ATWRKY69, WRKY69           | WRKY69 (WRKY DNA-binding protein 69); transcription factor                                                                                       | WRKY      |                |
| AT3G60030 | Green | SPL12                      | SPL12 (SQUAMOSA PROMOTER-BINDING PROTEIN-LIKE 12); transcription factor                                                                          | SBP       |                |
| AT3G61850 | Green | DAG1, AtDof3,7             | DAG1 (DOF AFFECTING GERMINATION 1), DAG1 (DOF AFFECTING GERMINATION 1); DNA binding / transcription factor, unknown protein                      | C2C2-Dof  |                |
| AT3G61890 | Green | ATHB12, ATHB-12            | ATHB-12 (ARABIDOPSIS THALIANA HOMEBOX PROTEIN 1); transcription factor                                                                           | HB        |                |
| AT3G62090 | Green | PIF6, PIL2                 | PIL2 (PHYTOCHROME INTERACTING FACTOR 3-LIKE 2), PIL2 (PHYTOCHROME INTERACTING FACTOR 3-LIKE 2); transcription factor                             | bHLH      |                |
| AT4G01680 | Green | ATMYB55                    | MYB55 (myb domain protein 55); DNA binding, MYB55 (myb domain protein 55); DNA binding / transcription factor, unknown protein                   | MYB       |                |
| AT4G12020 | Green | MAPKKK11, ATWRKY19, WRKY19 | WRKY19 (WRKY DNA-binding protein 19); transcription factor, unknown protein                                                                      | WRKY      |                |
| AT4G14465 | Green |                            | DNA-binding protein-related                                                                                                                      |           |                |
| AT4G14550 | Green | SLR, IAA14                 | IAA14 (SOLITARY ROOT); transcription factor                                                                                                      | AUX/IAA   |                |
| AT4G16845 | Green | VRN2                       | VRN2 (REDUCED VERNALIZATION RESPONSE 2), VRN2 (REDUCED VERNALIZATION RESPONSE 2); transcription factor                                           |           |                |
| AT4G17460 | Green | HAT1                       | HAT1 (homeobox-leucine zipper protein 1); DNA binding / transcription factor                                                                     | HB        |                |
| AT4G17900 | Green |                            | zinc-binding family protein                                                                                                                      | PLATZ     |                |
| AT4G24060 | Green | AtDof4,6                   | Dof-type zinc finger domain-containing protein                                                                                                   | C2C2-Dof  |                |
| AT4G30410 | Green |                            | transcription factor, unknown protein                                                                                                            |           |                |
| AT4G31920 | Green | ARR10                      | ARR10 (ARABIDOPSIS RESPONSE REGULATOR 10); transcription factor/ two-component response regulator                                                | ARR-B     |                |
| AT4G32880 | Green | ATHB8, ATHB-8              | ATHB-8 (HOMEBOX GENE 8); DNA binding / transcription factor                                                                                      | HB        | miR166/miR165, |
| AT4G34000 | Green | ABF3, DPBF5                | ABF3/DPBF5 (ABSCISIC ACID RESPONSIVE ELEMENTS-BINDING FACTOR 3); DNA binding / protein binding / transcription factor/ transcriptional activator | bZIP      |                |
| AT4G35550 | Green | HB-4, WOX13                | homeobox-leucine zipper protein (HB-2) / HD-ZIP protein                                                                                          | HB        |                |
| AT4G35570 | Green | NFD5, NFD05, HMGD, HMGB5   | HMGB5 (HIGH MOBILITY GROUP B 5); transcription factor                                                                                            | HMG       |                |
| AT4G35900 | Green | ATBZIP14, FD-1, FD         | FD (FD); DNA binding / transcription factor                                                                                                      |           |                |

|           |       |                                           |                                                                                                                                                   |              |                |
|-----------|-------|-------------------------------------------|---------------------------------------------------------------------------------------------------------------------------------------------------|--------------|----------------|
| AT4G36860 | Green | DAR1                                      | LIM domain-containing protein                                                                                                                     | Orphans      |                |
| AT4G36920 | Green | FL1, FLO2, AP2                            | AP2 (APETALA 2); transcription factor                                                                                                             | AP2-EREBP    | miR172,        |
| AT4G37540 | Green | LBD39                                     | LOB domain protein 39 / lateral organ boundaries domain protein 39 (LBD39)                                                                        |              |                |
| AT4G37650 | Green | SGR7, SHR                                 | SHR (SHORT ROOT); transcription factor                                                                                                            | GRAS         |                |
| AT4G37790 | Green | HAT22                                     | HAT22 (homeobox-leucine zipper protein 22); transcription factor                                                                                  | HB           |                |
| AT4G37940 | Green | AGL21                                     | AGL21 (AGAMOUS-LIKE 21); transcription factor                                                                                                     | MADS         |                |
| AT4G38680 | Green | ATCSP2, CSDP2, GRP2                       | GRP2 (COLD SHOCK DOMAIN PROTEIN 2); nucleic acid binding                                                                                          | CSD          |                |
| AT5G02470 | Green | DPA                                       | DPA; transcription factor                                                                                                                         | E2F-DP       |                |
| AT5G04150 | Green | bHLH101                                   | basic helix-loop-helix (bHLH) family protein                                                                                                      | bHLH         |                |
| AT5G05610 | Green | AL1                                       | PHD finger family protein                                                                                                                         | Alfin-like   |                |
| AT5G05660 | Green | ATNFXL2                                   | transcription factor                                                                                                                              |              |                |
| AT5G06110 | Green |                                           | DNAJ heat shock N-terminal domain-containing protein / cell division protein-related                                                              | MYB          |                |
| AT5G06420 | Green |                                           | zinc finger (CCCH-type/C3HC4-type RING finger) family protein                                                                                     | C3H          |                |
| AT5G06950 | Green | TGA2, AHBP-1B                             | AHBP-1B (bZIP transcription factor HBP-1b homolog), AHBP-1B (bZIP transcription factor HBP-1b homolog); DNA binding / transcription factor        | bZIP         |                |
| AT5G06960 | Green | TGA5, OBF5                                | OBF5 (OCS-ELEMENT BINDING FACTOR 5); DNA binding / transcription factor                                                                           | bZIP         |                |
| AT5G08130 | Green | BIM1, bHLH046                             | BIM1 (BES1-interacting Myc-like protein 1); DNA binding / transcription factor, unknown protein                                                   | bHLH         |                |
| AT5G09410 | Green | EICBP.B                                   | EICBP.B (ETHYLENE INDUCED CALMODULIN BINDING PROTEIN); calmodulin binding / transcription regulator, unknown protein                              | CAMTA        |                |
| AT5G12330 | Green | LRP1                                      | LRP1 (LATERAL ROOT PRIMORDIUM 1)                                                                                                                  | SRS          |                |
| AT5G13080 | Green | ATWRKY75, WRKY75                          | WRKY75 (WRKY DNA-binding protein 75); transcription factor                                                                                        | WRKY         |                |
| AT5G13330 | Green | RAP2.6L                                   | RAP2.6L (related to AP2 6L); DNA binding / transcription factor                                                                                   | AP2-EREBP    |                |
| AT5G13730 | Green | SIGD, SIG4                                | SIG4 (SIGMA FACTOR 4); DNA binding / DNA-directed RNA polymerase / transcription factor                                                           | Sigma70-like |                |
| AT5G13960 | Green | SDG33, KYP, SUVH4                         | SUVH4 (SU(VAR)3-9 HOMOLOG 4)                                                                                                                      | SET          |                |
| AT5G16680 | Green |                                           | PHD finger family protein                                                                                                                         | PHD          |                |
| AT5G17240 | Green | SDG40                                     | SET domain-containing protein                                                                                                                     | SET          |                |
| AT5G17490 | Green | RGL3                                      | RGL3 (RGA-LIKE 3); transcription factor                                                                                                           | GRAS         |                |
| AT5G17600 | Green |                                           | zinc finger (C3HC4-type RING finger) family protein                                                                                               |              |                |
| AT5G18830 | Green | SPL7                                      | SPL7 (SQUAMOSA PROMOTER BINDING PROTEIN-LIKE 7); DNA binding / transcription factor                                                               | SBP          |                |
| AT5G19490 | Green |                                           | repressor protein-related                                                                                                                         | CCAAT        |                |
| AT5G20730 | Green | MSG1, IAA21, BIP, ARF7, IAA25, IAA23, TIR | NPH4 (NON-PHOTOTROPIC HYPOCOTYL); transcription factor                                                                                            | ARF          |                |
| AT5G22700 | Green |                                           | F-box family protein                                                                                                                              |              |                |
| AT5G22760 | Green |                                           | PHD finger family protein                                                                                                                         | DDT          |                |
| AT5G23090 | Green | NF-YB13                                   | TATA-binding protein-associated phosphoprotein Dr1 protein, putative (DR1)                                                                        | CCAAT        |                |
| AT5G23150 | Green | HUA2                                      | HUA2 (ENHANCER OF AG-4 2)                                                                                                                         |              |                |
| AT5G24470 | Green | APRR5                                     | APRR5 (PSEUDO-RESPONSE REGULATOR 5); transcription regulator                                                                                      | Pseudo ARR-B |                |
| AT5G26920 | Green |                                           | calmodulin binding                                                                                                                                |              |                |
| AT5G28650 | Green | ATWRKY74, WRKY74                          | WRKY74 (WRKY DNA-binding protein 74); transcription factor                                                                                        | WRKY         |                |
| AT5G29000 | Green |                                           | myb family transcription factor, unknown protein                                                                                                  | G2-like      |                |
| AT5G35210 | Green |                                           | peptidase M50 family protein / sterol-regulatory element binding protein (SREBP) site 2 protease family protein                                   | DDT          |                |
| AT5G38560 | Green |                                           | protein kinase family protein                                                                                                                     |              |                |
| AT5G38895 | Green |                                           | zinc finger (C3HC4-type RING finger) family protein                                                                                               |              |                |
| AT5G40710 | Green |                                           | zinc finger (C2H2 type) family protein                                                                                                            |              |                |
| AT5G42520 | Green | BPC6, BBR/BPC6, ATBPC6                    | ATBPC6/BBR/BPC6/BPC6 (BASIC PENTACYSSTEINE 6), ATBPC6/BBR/BPC6/BPC6 (BASIC PENTACYSSTEINE 6); DNA binding / transcription factor                  |              |                |
| AT5G43270 | Green | SPL2                                      | SPL2 (SQUAMOSA PROMOTER BINDING PROTEIN-LIKE 2); DNA binding, SPL2 (SQUAMOSA PROMOTER BINDING PROTEIN-LIKE 2); DNA binding / transcription factor | SBP          | miR156/miR157, |
| AT5G44160 | Green | NUC                                       | zinc finger (C2H2 type) family protein                                                                                                            | C2H2         |                |
| AT5G45260 | Green | ATWRKY52, SLH1, RRS1                      | RRS1 (RESISTANT TO RALSTONIA SOLANACEARUM 1), RRS1 (RESISTANT TO RALSTONIA SOLANACEARUM 1); transcription factor                                  | WRKY         |                |
| AT5G45710 | Green | RHA1, AT-HSFA4C                           | AT-HSFA4C (Arabidopsis thaliana heat shock transcription factor A4C); DNA binding / transcription factor                                          | HSF          |                |
| AT5G46590 | Green | ANAC096                                   | ANAC096 (Arabidopsis NAC domain containing protein 96); transcription factor                                                                      | NAC          |                |
| AT5G49620 | Green | ATMYB78                                   | AtMYB78 (myb domain protein 78); DNA binding / transcription factor                                                                               | MYB          |                |
| AT5G51910 | Green | TCP19                                     | TCP family transcription factor, putative                                                                                                         | TCP          |                |
| AT5G52170 | Green | HDG7                                      | homeobox-leucine zipper family protein / lipid-binding START domain-containing protein                                                            | HB           |                |

|           |             |                      |                                                                                                                              |              |
|-----------|-------------|----------------------|------------------------------------------------------------------------------------------------------------------------------|--------------|
| AT5G53290 | Green       | CRF3                 | CRF3 (CYTOKININ RESPONSE FACTOR 3); DNA binding / transcription factor                                                       | AP2-EREBP    |
| AT5G53420 | Green       |                      | unknown protein                                                                                                              | Orphans      |
| AT5G60200 | Green       | AtDof5.3             | Dof-type zinc finger domain-containing protein                                                                               | C2C2-Dof     |
| AT5G60890 | Green       | AtMYB34, MYB34, ATR1 | ATR1 (ALTERED TRYPTOPHAN REGULATION); DNA binding / kinase/ transcription factor                                             | MYB          |
| AT5G61380 | Green       | APRR1, TOC1          | TOC1 (TIMING OF CAB1 1); transcription regulator                                                                             | Pseudo ARR-B |
| AT5G61930 | Green       | APO3                 | APO3 (ACCUMULATION OF PHOTOSYSTEM ONE 3), unknown protein                                                                    |              |
| AT5G62570 | Green       |                      | calmodulin-binding protein                                                                                                   |              |
| AT5G62610 | Green       | bHLH079              | basic helix-loop-helix (bHLH) family protein                                                                                 | bHLH         |
| AT5G62920 | Green       | ARR6                 | ARR6 (RESPONSE REGULATOR 6); transcription regulator/ two-component response regulator                                       | Orphans      |
| AT5G62940 | Green       | AtDof5.6             | Dof-type zinc finger domain-containing protein                                                                               | C2C2-Dof     |
| AT5G63080 | Green       |                      | transcription factor jumonji (jnjC) domain-containing protein                                                                | Jumonji      |
| AT5G64220 | Green       |                      | calmodulin binding, calmodulin-binding protein                                                                               | CAMTA        |
| AT5G64610 | Green       | HAM1                 | histone acetyltransferase, putative                                                                                          |              |
| AT5G65050 | Green       | MAF2, AGL31          | AGL31 (AGAMOUS LIKE MADS-BOX PROTEIN 31), AGL31 (AGAMOUS LIKE MADS-BOX PROTEIN 31); transcription factor, unknown protein    | MADS         |
| AT5G65310 | Green       | ATHB-5, ATHB5        | ATHB5 (ARABIDOPSIS THALIANA HOMEODOMAIN PROTEIN 5), ATHB5 (ARABIDOPSIS THALIANA HOMEODOMAIN PROTEIN 5); transcription factor | HB           |
| AT5G65670 | Green       | IAA9                 | IAA9 (indoleacetic acid-induced protein 9); transcription factor                                                             | AUX/IAA      |
| AT5G66070 | Green       |                      | protein binding / zinc ion binding, zinc finger (C3HC4-type RING finger) family protein                                      |              |
| AT5G66350 | Green       | SHI                  | SHI (SHORT INTERNODES); transcription factor                                                                                 | SRS          |
| AT5G66700 | Green       | ATHB53, HB53, HB-8   | HB53 (homeobox-8); DNA binding / transcription factor                                                                        | HB           |
| AT5G67110 | Green       | ALC, bHLH073         | ALC (ALCATRAZ), ALC (ALCATRAZ); DNA binding / transcription factor                                                           | bHLH         |
| AT5G67420 | Green       | LBD37                | LOB domain protein 37 / lateral organ boundaries domain protein 37 (LBD37)                                                   |              |
| AT1G19000 | Greenyellow |                      | myb family transcription factor                                                                                              | MYB-related  |
| AT1G32150 | Greenyellow |                      | bZIP transcription factor family protein                                                                                     | bZIP         |
| AT1G50440 | Greenyellow |                      | unknown protein, zinc finger (C3HC4-type RING finger) family protein                                                         |              |
| AT1G64280 | Greenyellow | SAI1, NIM1, NPR1     | NPR1 (NONEXPRESSER OF PR GENES 1); protein binding                                                                           |              |
| AT1G76900 | Greenyellow | AtTLP1               | AtTLP1 (TUBBY LIKE PROTEIN 1); phosphoric diester hydrolase/ transcription factor                                            | TUB          |
| AT2G26940 | Greenyellow |                      | zinc finger (C2H2 type) family protein                                                                                       | C2H2         |
| AT2G28290 | Greenyellow | CHR3, SYD            | SYD (SPRAYED)                                                                                                                | SNF2         |
| AT2G30410 | Greenyellow | TFCA, KIS            | KIS (KIESEL); unfolded protein binding                                                                                       |              |
| AT3G06140 | Greenyellow |                      | zinc finger (C3HC4-type RING finger) family protein                                                                          |              |
| AT3G07940 | Greenyellow |                      | zinc finger and C2 domain protein, putative                                                                                  |              |
| AT3G09600 | Greenyellow |                      | DNA binding / transcription factor, myb family transcription factor                                                          | MYB-related  |
| AT3G18990 | Greenyellow | REM39, VRN1          | VRN1 (REDUCED VERNALIZATION RESPONSE 1)                                                                                      | ABI3VP1      |
| AT3G50650 | Greenyellow | SCL7                 | scarecrow-like transcription factor 7 (SCL7)                                                                                 | GRAS         |
| AT4G00760 | Greenyellow | APRR8                | APRR8 (PSEUDO-RESPONSE REGULATOR 8); transcription regulator                                                                 | Orphans      |
| AT4G25560 | Greenyellow | ATMYB18              | AtMYB18 (myb domain protein 18); DNA binding / transcription factor                                                          | MYB          |
| AT4G34610 | Greenyellow | BLH6                 | BLH6 (BELL1-LIKE HOMEODOMAIN 5); DNA binding / transcription factor, unknown protein                                         | HB           |
| AT4G37730 | Greenyellow | ATBZIP7              | bZIP transcription factor family protein                                                                                     | bZIP         |
| AT5G02460 | Greenyellow | AtDof5.1             | Dof-type zinc finger domain-containing protein                                                                               | C2C2-Dof     |
| AT5G05090 | Greenyellow |                      | myb family transcription factor                                                                                              | G2-like      |
| AT3G30210 | Grey        | ATMYB121             | MYB121 (myb domain protein 121); DNA binding / transcription factor                                                          | MYB          |
| AT1G06040 | Grey60      | STO                  | STO (SALT TOLERANCE); transcription factor/ zinc ion binding                                                                 | Orphans      |
| AT1G17520 | Grey60      |                      | DNA-binding protein, putative                                                                                                | MYB-related  |
| AT1G18330 | Grey60      | EPR1                 | EPR1 (EARLY-PHYTOCHROME-RESPONSIVE1); DNA binding / transcription factor, unknown protein                                    | MYB-related  |
| AT1G33060 | Grey60      | ANAC014              | ANAC014, ANAC014; transcription factor                                                                                       | NAC          |
| AT1G76350 | Grey60      | NLP5                 | RWP-RK domain-containing protein                                                                                             | RWP-RK       |
| AT2G23660 | Grey60      | LBD10                | LOB domain family protein / lateral organ boundaries domain family protein (LBD10)                                           |              |
| AT2G33500 | Grey60      | COL14                | zinc finger (B-box type) family protein                                                                                      | C2C2-CO-like |
| AT2G44150 | Grey60      | SDG7, ASHH3          | SET domain-containing protein (ASHH3)                                                                                        | SET          |
| AT3G05430 | Grey60      |                      | PWWP domain-containing protein                                                                                               |              |
| AT3G10910 | Grey60      |                      | zinc finger (C3HC4-type RING finger) family protein                                                                          |              |
| AT4G05330 | Grey60      | AGD13                | AGD13 (ARF-GAP DOMAIN 13)                                                                                                    |              |
| AT4G16420 | Grey60      | PRZ1, ADA2B          | ADA2B (PROPORZ1); DNA binding / transcription factor                                                                         | MYB-related  |

|           |             |                               |                                                                                                                            |              |
|-----------|-------------|-------------------------------|----------------------------------------------------------------------------------------------------------------------------|--------------|
| AT4G35040 | Grey60      |                               | bZIP transcription factor family protein                                                                                   | bZIP         |
| AT5G02840 | Grey60      | LCL1                          | DNA binding / transcription factor, myb family transcription factor                                                        | MYB-related  |
| AT5G60820 | Grey60      |                               | zinc finger (C3HC4-type RING finger) family protein                                                                        |              |
| AT1G01930 | Lightcyan   |                               | zinc finger protein-related                                                                                                |              |
| AT1G30460 | Lightcyan   | CPSF30, ATCPSF30              | ATCPSF30/CPSF30, ATCPSF30/CPSF30; RNA binding / calmodulin binding / nucleic acid binding                                  | C3H          |
| AT3G12130 | Lightcyan   |                               | KH domain-containing protein / zinc finger (CCCH type) family protein                                                      | C3H          |
| AT1G16070 | Lightyellow | AtTLP8                        | AtTLP8 (TUBBY LIKE PROTEIN 8), AtTLP8 (TUBBY LIKE PROTEIN 8); transcription factor                                         | TUB          |
| AT1G61730 | Lightyellow |                               | DNA-binding storekeeper protein-related                                                                                    | GeBP         |
| AT1G76500 | Lightyellow | SOB3, AHL29                   | DNA-binding family protein                                                                                                 |              |
| AT3G09360 | Lightyellow |                               | RNA polymerase II transcription factor                                                                                     |              |
| AT3G62240 | Lightyellow |                               | zinc finger (C2H2 type) family protein                                                                                     |              |
| AT5G46710 | Lightyellow |                               | zinc-binding family protein                                                                                                | PLATZ        |
| AT1G03970 | Magenta     | GBF4                          | GBF4 (G-box binding factor 4); transcription factor                                                                        | bZIP         |
| AT1G09770 | Magenta     | ATCDC5, AtMYBCDC5             | ATCDC5 (Arabidopsis thaliana homolog of cdc5); DNA binding / transcription factor                                          | MYB          |
| AT1G44810 | Magenta     |                               | transcription regulator                                                                                                    | GeBP         |
| AT1G46264 | Magenta     | AT-HSFB4                      | AT-HSFB4 (Arabidopsis thaliana heat shock transcription factor B4); DNA binding / transcription factor                     | HSF          |
| AT1G54060 | Magenta     | ASL1                          | transcription factor                                                                                                       | Trihelix     |
| AT1G68640 | Magenta     | PAN                           | PAN (PERIANTHIA); DNA binding / transcription factor                                                                       | bZIP         |
| AT1G71130 | Magenta     |                               | AP2 domain-containing transcription factor, putative                                                                       | AP2-EREBP    |
| AT2G01570 | Magenta     | RGA1                          | RGA1 (REPRESSOR OF GA1-3 1); transcription factor                                                                          | GRAS         |
| AT2G03340 | Magenta     | WRKY3                         | WRKY3 (WRKY DNA-binding protein 3); transcription factor                                                                   | WRKY         |
| AT2G23340 | Magenta     |                               | AP2 domain-containing transcription factor, putative                                                                       | AP2-EREBP    |
| AT2G24790 | Magenta     | COL3                          | COL3 (CONSTANS-LIKE 3); protein binding / transcription factor/ zinc ion binding, COL3 (CONSTANS-LIKE 3); zinc ion binding | C2C2-CO-like |
| AT2G34720 | Magenta     | NF-YA4                        | CCAAT-binding transcription factor (CBF-B/NF-YA) family protein                                                            | CCAAT        |
| AT2G37060 | Magenta     | NF-YB8                        | CCAAT-box binding transcription factor, putative                                                                           | CCAAT        |
| AT2G42030 | Magenta     |                               | zinc finger (C3HC4-type RING finger) family protein                                                                        |              |
| AT2G42040 | Magenta     |                               | unknown protein                                                                                                            | Orphans      |
| AT2G44730 | Magenta     |                               | transcription factor                                                                                                       | Trihelix     |
| AT3G06010 | Magenta     | ATCHR12                       | homeotic gene regulator, putative                                                                                          | SNF2         |
| AT3G09770 | Magenta     |                               | zinc finger (C3HC4-type RING finger) family protein                                                                        |              |
| AT3G11100 | Magenta     |                               | transcription factor                                                                                                       | Trihelix     |
| AT3G14740 | Magenta     |                               | PHD finger family protein                                                                                                  | PHD          |
| AT3G16770 | Magenta     | RAP2.03, ATEBP, RAP2.3 ,ERF72 | ATEBP/RAP2.3 (RELATED TO AP2 3); DNA binding / protein binding / transcription factor/ transcriptional activator           | AP2-EREBP    |
| AT3G18640 | Magenta     |                               | zinc finger protein-related                                                                                                | C3H          |
| AT3G25890 | Magenta     |                               | AP2 domain-containing transcription factor, putative                                                                       | AP2-EREBP    |
| AT3G28730 | Magenta     | NFD, SSRP1, ATHMG             | ATHMG (HIGH MOBILITY GROUP, STRUCTURE-SPECIFIC RECOGNITION PROTEIN 1); transcription factor                                | HMG          |
| AT3G52800 | Magenta     |                               | zinc finger (AN1-like) family protein                                                                                      |              |
| AT3G54350 | Magenta     | EMB1967                       | EMB1967 (EMBRYO DEFECTIVE 1967)                                                                                            | FHA          |
| AT4G10710 | Magenta     | SPT16                         | SPT16 (GLOBAL TRANSCRIPTION FACTOR C); metalloexopeptidase                                                                 |              |
| AT4G13460 | Magenta     | SET22, SDG22, SUVH9           | SUVH9 (SU(VAR)3-9 HOMOLOG 9); histone-lysine N-methyltransferase/ zinc ion binding                                         | SET          |
| AT4G25210 | Magenta     |                               | transcription regulator                                                                                                    | GeBP         |
| AT4G29190 | Magenta     |                               | zinc finger (CCCH-type) family protein                                                                                     | C3H          |
| AT4G35580 | Magenta     | NTL9, CBNAC                   | no apical meristem (NAM) family protein, unknown protein                                                                   | NAC          |
| AT4G36730 | Magenta     | GBF1                          | GBF1 (G-box binding factor 1); transcription factor                                                                        | bZIP         |
| AT4G37260 | Magenta     | ATMYB73                       | AtMYB73/MYB73 (myb domain protein 73); DNA binding / transcription factor                                                  | MYB          |
| AT5G05550 | Magenta     |                               | transcription factor                                                                                                       | Trihelix     |
| AT5G09790 | Magenta     | SDG15, ATXR5                  | ATXR5 (Trithorax- related protein 5), ATXR5 (Trithorax- related protein 5); DNA binding                                    | PHD          |
| AT5G12400 | Magenta     |                               | PHD finger transcription factor, putative                                                                                  | DDT          |
| AT5G14460 | Magenta     |                               | pseudouridylylase synthase TruB family protein                                                                             |              |
| AT5G18620 | Magenta     | CHR17                         | CHR17 (CHROMATIN REMODELING FACTOR17); DNA-dependent ATPase                                                                | SNF2         |
| AT5G23420 | Magenta     | HMGB6                         | HMGB6 (High mobility group B 6); transcription factor                                                                      | HMG          |



|           |              |                    |                                                                                                                           |             |
|-----------|--------------|--------------------|---------------------------------------------------------------------------------------------------------------------------|-------------|
| AT5G25220 | Magenta      | KNAT3              | KNAT3 (KNOTTED1-LIKE HOMEBOX GENE 3), KNAT3 (KNOTTED1-LIKE HOMEBOX GENE 3); transcription factor                          | HB          |
| AT5G41370 | Magenta      | XPB1, ATPXB1       | XPB1 (ARABIDOPSIS HOMOLOG OF XERODERMA PIGMENTOSUM COMPLEMENTATION GROUP B 1); ATP-dependent helicase                     |             |
| AT5G47790 | Magenta      |                    | forkhead-associated domain-containing protein / FHA domain-containing protein                                             | FHA         |
| AT5G62000 | Magenta      | HSS, ARF1-BP, ARF2 | ARF2 (AUXIN RESPONSE FACTOR 2), ARF2 (AUXIN RESPONSE FACTOR 2); transcription factor                                      | ARF         |
| AT5G62260 | Magenta      |                    | DNA binding                                                                                                               |             |
| AT1G51700 | Midnightblue | ADOF1, AtDof1. 7   | ADOF1 (Arabidopsis dof zinc finger protein 1); DNA binding / transcription factor                                         | C2C2-Dof    |
| AT4G26150 | Midnightblue | CGA1, GNL          | zinc finger (GATA type) family protein                                                                                    | C2C2-GATA   |
| AT4G30935 | Midnightblue | ATWRKY32, WRKY32   | WRKY32 (WRKY DNA-binding protein 32); transcription factor                                                                | WRKY        |
| AT5G06080 | Midnightblue | LBD33              | LOB domain protein 33 / lateral organ boundaries domain protein 33 (LBD33)                                                |             |
| AT1G01160 | Orange       | GIF2               | GIF2 (GRF1-INTERACTING FACTOR 2)                                                                                          |             |
| AT1G70790 | Orange       |                    | C2 domain-containing protein                                                                                              |             |
| AT5G66610 | Orange       | DAR7               | zinc ion binding                                                                                                          | Orphans     |
| AT1G04100 | Pink         | IAA10              | IAA10 (indoleacetic acid-induced protein 10); transcription factor                                                        | AUX/IAA     |
| AT1G10610 | Pink         | bHLH090            | DNA binding / transcription factor                                                                                        | bHLH        |
| AT1G15050 | Pink         | IAA34              | IAA34 (indoleacetic acid-induced protein 34); transcription factor                                                        | AUX/IAA     |
| AT1G18470 | Pink         |                    | zinc finger (C3HC4-type RING finger) family protein                                                                       |             |
| AT1G49900 | Pink         |                    | zinc finger (C2H2 type) family protein                                                                                    | C2H2        |
| AT1G55700 | Pink         |                    | DC1 domain-containing protein                                                                                             |             |
| AT1G56160 | Pink         | ATMYB72            | AtMYB72 (myb domain protein 72); DNA binding / transcription factor                                                       | MYB         |
| AT1G77950 | Pink         | AGL67              | transcription factor, unknown protein                                                                                     | MADS        |
| AT2G04240 | Pink         | XERICO             | XERICO; protein binding / zinc ion binding                                                                                |             |
| AT2G17770 | Pink         | FDP, ATBZIP27      | ATBZIP27/FDP (FD PARALOG); transcription factor                                                                           |             |
| AT2G19380 | Pink         |                    | RNA recognition motif (RRM)-containing protein                                                                            |             |
| AT2G22630 | Pink         | AGL17              | AGL17 (AGAMOUS-LIKE 17); transcription factor                                                                             | MADS        |
| AT2G23780 | Pink         |                    | zinc finger (C3HC4-type RING finger) family protein                                                                       |             |
| AT2G40770 | Pink         |                    | SNF2 domain-containing protein / helicase domain-containing protein / zinc finger (C3HC4 type RING finger) family protein | PHD         |
| AT2G41370 | Pink         | BOP2               | BOP2 (BLADE ON PETIOLE2); protein binding                                                                                 |             |
| AT2G44580 | Pink         |                    | protein binding / zinc ion binding                                                                                        |             |
| AT2G47810 | Pink         | NF-YB5             | histone-like transcription factor (CBF/NF-Y) family protein                                                               | CCAAT       |
| AT3G06490 | Pink         | BOS1, AtMYB108     | MYB108 (BOTRYTIS-SUSCEPTIBLE1, myb domain protein 108); DNA binding / transcription factor                                | MYB         |
| AT3G11440 | Pink         | AtMYB65            | ATMYB65 (myb domain protein 65); DNA binding / transcription factor                                                       | MYB         |
| AT3G12730 | Pink         |                    | myb family transcription factor                                                                                           | G2-like     |
| AT3G12820 | Pink         | ATMYB10            | AtMYB10 (myb domain protein 10); DNA binding / transcription factor                                                       | MYB         |
| AT3G20550 | Pink         | DDL                | DDL (DAWDLE)                                                                                                              | FHA         |
| AT3G23230 | Pink         |                    | ethylene-responsive factor, putative                                                                                      | AP2-EREBP   |
| AT3G55530 | Pink         | SDIR1              | unknown protein                                                                                                           |             |
| AT3G56660 | Pink         | BZIP49             | bZIP transcription factor family protein                                                                                  | bZIP        |
| AT3G57480 | Pink         |                    | zinc finger (C2H2 type, AN1-like) family protein                                                                          | C2H2        |
| AT4G25440 | Pink         | ZFWD1              | ZFWD1 (zinc finger WD40 repeat protein 1); nucleic acid binding / zinc ion binding                                        | C3H         |
| AT4G27470 | Pink         |                    | zinc finger (C3HC4-type RING finger) family protein                                                                       |             |
| AT5G07700 | Pink         | ATMYB76            | MYB76 (myb domain protein 76); DNA binding / transcription factor                                                         | MYB         |
| AT5G11590 | Pink         | DREB3, TINY2       | TINY2 (TINY2); DNA binding / transcription factor                                                                         | AP2-EREBP   |
| AT5G16820 | Pink         | ATHSFA1B, HSF3     | HSF3 (HEAT SHOCK FACTOR 3); DNA binding / transcription factor                                                            | HSF         |
| AT5G27910 | Pink         | NF-YC8             | CCAAT-box binding transcription factor Hap5a, putative                                                                    | CCAAT       |
| AT5G50915 | Pink         | bHLH137            | basic helix-loop-helix (bHLH) family protein                                                                              | bHLH        |
| AT5G53660 | Pink         | AtGRF7             | AtGRF7 (GROWTH-REGULATING FACTOR 7)                                                                                       | GRF         |
| AT5G54230 | Pink         | ATMYB49            | MYB49 (myb domain protein 49); transcription factor                                                                       | MYB         |
| AT5G58010 | Pink         | bHLH082            | basic helix-loop-helix (bHLH) family protein                                                                              | bHLH        |
| AT5G61590 | Pink         |                    | AP2 domain-containing transcription factor family protein                                                                 | AP2-EREBP   |
| AT5G62380 | Pink         | ANAC101, VND6      | VND6 (VASCULAR-RELATED NAC-DOMAIN 6); transcription factor                                                                | NAC         |
| AT1G21700 | Purple       | CHB4, ATSWI3C      | ATSWI3C (Arabidopsis thaliana switching protein 3C); DNA binding                                                          | MYB-related |
| AT1G22510 | Purple       |                    | zinc finger (C3HC4-type RING finger) family protein                                                                       |             |

|           |        |                                   |                                                                                                   |           |                |
|-----------|--------|-----------------------------------|---------------------------------------------------------------------------------------------------|-----------|----------------|
| AT1G48040 | Purple |                                   | protein phosphatase type 2C                                                                       | DBP       |                |
| AT1G63900 | Purple |                                   | zinc finger (C3HC4-type RING finger) family protein                                               |           |                |
| AT2G18670 | Purple |                                   | zinc finger (C3HC4-type RING finger) family protein                                               |           |                |
| AT2G21450 | Purple | CHR34                             | CHR34 (chromatin remodeling 34); ATP binding / DNA binding / helicase                             | SNF2      |                |
| AT2G40740 | Purple | ATWRKY55, WRKY55                  | WRKY55 (WRKY DNA-binding protein 55), WRKY55 (WRKY DNA-binding protein 55); transcription factor  | WRKY      |                |
| AT2G43500 | Purple | NLP8                              | RWP-RK domain-containing protein                                                                  | RWP-RK    |                |
| AT3G28910 | Purple | AtMYB30, MYB30                    | MYB30 (myb domain protein 30); DNA binding / transcription factor                                 | MYB       |                |
| AT3G28920 | Purple | ATHB34                            | ATHB34 (ARABIDOPSIS THALIANA HOMEODOMAIN PROTEIN 34); DNA binding / transcription factor          | zf-HD     |                |
| AT4G01270 | Purple |                                   | zinc finger (C3HC4-type RING finger) family protein                                               |           |                |
| AT4G29940 | Purple | PRHA                              | PRHA (PATHOGENESIS RELATED HOMEODOMAIN PROTEIN A); transcription factor                           | HB        |                |
| AT4G36650 | Purple | ATPBRP                            | transcription factor IIB (TFIIB) family protein                                                   |           |                |
| AT4G37490 | Purple | CYC1, CYCB1;1, CYCB1              | CYC1 (CYCLIN 1); cyclin-dependent protein kinase regulator                                        |           |                |
| AT5G03740 | Purple | HD2C, HDT3                        | HD2C (HISTONE DEACETYLASE 2C); nucleic acid binding / zinc ion binding                            | C2H2      |                |
| AT5G03780 | Purple | TRFL10                            | TRFL10 (TRF-LIKE 10); DNA binding                                                                 |           |                |
| AT5G03790 | Purple | LM11, ATHB51                      | ATHB51/LM11 (LATE MERISTEM IDENTITY 1); DNA binding / transcription factor                        | HB        |                |
| AT5G05410 | Purple | DREB2A                            | DREB2A (DRE-BINDING PROTEIN 2A); DNA binding / transcription factor/ transcriptional activator    | AP2-EREBP |                |
| AT5G18270 | Purple | ANAC087                           | ANAC087, ANAC087; transcription factor                                                            | NAC       |                |
| AT5G45110 | Purple | NPR3                              | NPR3 (NPR1-LIKE PROTEIN 3); protein binding                                                       |           |                |
| AT5G54640 | Purple | HTA1, RAT5                        | RAT5 (RESISTANT TO AGROBACTERIUM TRANSFORMATION 5); DNA binding                                   | CCAAT     |                |
| AT5G61850 | Purple | LFY3, LFY                         | LFY (LEAFY); transcription factor                                                                 | LFY       |                |
| AT5G65510 | Purple | AIL7                              | AIL7 (AINTEGUMENTA-LIKE 7); DNA binding / transcription factor                                    | AP2-EREBP |                |
| AT1G02340 | Red    | FBI1, RSF1, REP1, HFR1            | HFR1 (LONG HYPOCOTYL IN FAR-RED); DNA binding / transcription factor                              | bHLH      |                |
| AT1G03040 | Red    | bHLH007                           | basic helix-loop-helix (bHLH) family protein                                                      | bHLH      |                |
| AT1G03840 | Red    | MGP                               | nucleic acid binding / zinc ion binding, zinc finger (C2H2 type) family protein                   | C2H2      |                |
| AT1G04550 | Red    | BDL, IAA12                        | IAA12 (AUXIN-INDUCED PROTEIN 12); transcription factor                                            | AUX/IAA   |                |
| AT1G06180 | Red    | ATMYB13, AtMYB1fgn                | ATMYB13 (myb domain protein 13); DNA binding / transcription factor                               | MYB       |                |
| AT1G08600 | Red    | ATRX, CHR20                       | ATRX/CHR20; ATP binding / DNA binding / helicase                                                  | SNF2      |                |
| AT1G10120 | Red    | bHLH074                           | DNA binding / transcription factor                                                                | bHLH      |                |
| AT1G13880 | Red    |                                   | ELM2 domain-containing protein                                                                    |           |                |
| AT1G19700 | Red    | BEL10, BLH10                      | BEL10 (BEL1-LIKE HOMEODOMAIN 10); DNA binding / transcription factor                              | HB        |                |
| AT1G20640 | Red    | NLP4                              | RWP-RK domain-containing protein                                                                  | RWP-RK    |                |
| AT1G32640 | Red    | JIN1, JAI1, ZBF1, RD22BP1, ATMYC2 | ATMYC2 (JASMONATE INSENSITIVE 1); DNA binding / transcription factor                              | bHLH      |                |
| AT1G34355 | Red    |                                   | forkhead-associated domain-containing protein / FHA domain-containing protein                     | FHA       |                |
| AT1G35560 | Red    | TCP23                             | TCP family transcription factor, putative                                                         | TCP       |                |
| AT1G50620 | Red    |                                   | PHD finger family protein                                                                         | PHD       |                |
| AT1G51060 | Red    | HTA10                             | histone H2A, putative                                                                             | CCAAT     |                |
| AT1G52890 | Red    | ANAC019                           | ANAC019 (Arabidopsis NAC domain containing protein 19); transcription factor                      | NAC       |                |
| AT1G53910 | Red    | RAP2.12                           | RAP2.12, RAP2.12; DNA binding / transcription factor                                              | AP2-EREBP |                |
| AT1G63470 | Red    |                                   | DNA-binding family protein                                                                        |           |                |
| AT1G69570 | Red    | AtDof1,10                         | Dof-type zinc finger domain-containing protein                                                    | C2C2-Dof  |                |
| AT1G73760 | Red    |                                   | zinc finger (C3HC4-type RING finger) family protein                                               |           |                |
| AT1G76870 | Red    |                                   | unknown protein                                                                                   |           |                |
| AT1G76880 | Red    |                                   | trihelix DNA-binding protein, putative                                                            | Trihelix  |                |
| AT2G04880 | Red    | ATWRKY1, ZAP1                     | ZAP1 (WRKY FAMILY TRANSCRIPTION FACTOR 1); transcription factor/ transcriptional activator        | WRKY      |                |
| AT2G06200 | Red    | ATGRF6                            | AtGRF6 (GROWTH-REGULATING FACTOR 6)                                                               | GRF       |                |
| AT2G17560 | Red    | NFD4, NFD04, HMGB4                | HMGB4 (HIGH MOBILITY GROUP B 4), HMGB4 (HIGH MOBILITY GROUP B 4); transcription factor            | HMG       |                |
| AT2G18350 | Red    | ATHB24                            | ATHB24 (ARABIDOPSIS THALIANA HOMEODOMAIN PROTEIN 24); DNA binding / transcription factor          | zf-HD     |                |
| AT2G20180 | Red    | PIL5, bHLH015, PIF1               | PIL5 (PHYTOCHROME INTERACTING FACTOR 3-LIKE 5); transcription factor                              | bHLH      |                |
| AT2G23290 | Red    | ATMYB70                           | AtMYB70 (myb domain protein 70); DNA binding / transcription factor                               | MYB       |                |
| AT2G24630 | Red    | ATCSLC8, ATCSLC08                 | ATCSLC08 (Cellulose synthase-like C8); transferase, transferring glycosyl groups                  |           |                |
| AT2G25180 | Red    | ARR12                             | ARR12 (ARABIDOPSIS RESPONSE REGULATOR 12); transcription factor/ two-component response regulator | ARR-B     |                |
| AT2G25900 | Red    | ATCTH                             | ATCTH (Arabidopsis thaliana Cys3His zinc finger protein); transcription factor                    | C3H       |                |
| AT2G31070 | Red    | TCP10                             | TCP10 (TCP domain protein 10); transcription factor                                               | TCP       | miR159/miR319, |
| AT2G31180 | Red    | ATMYB14, Myb14at                  | AtMYB14/Myb14at (myb domain protein 14); DNA binding / transcription factor                       | MYB       |                |

|           |     |                         |                                                                                                                           |              |
|-----------|-----|-------------------------|---------------------------------------------------------------------------------------------------------------------------|--------------|
| AT2G32370 | Red | HDG3                    | homeobox-leucine zipper family protein / lipid-binding START domain-containing protein                                    | HB           |
| AT2G37950 | Red |                         | zinc finger (C3HC4-type RING finger) family protein                                                                       |              |
| AT2G40260 | Red |                         | myb family transcription factor                                                                                           | G2-like      |
| AT2G45460 | Red |                         | forkhead-associated domain-containing protein / FHA domain-containing protein                                             | FHA          |
| AT2G45880 | Red | BAM7, BMY4              | BMY4 (beta-amylase 4); beta-amylase                                                                                       | BES1         |
| AT2G46510 | Red | ATAIB, bHLH107, bHLH017 | basic helix-loop-helix (bHLH) family protein                                                                              | bHLH         |
| AT2G46790 | Red | TL1, APRR9              | APRR9 (PSEUDO-RESPONSE REGULATOR 9), APRR9 (PSEUDO-RESPONSE REGULATOR 9); transcription regulator                         | Pseudo ARR-B |
| AT3G04060 | Red | ANAC046                 | ANAC046 (Arabidopsis NAC domain containing protein 46); transcription factor                                              | NAC          |
| AT3G06740 | Red |                         | zinc finger (GATA type) family protein                                                                                    | C2C2-GATA    |
| AT3G08020 | Red |                         | protein binding / zinc ion binding                                                                                        | PHD          |
| AT3G09370 | Red | ATMYB3R-3, ATMYB3R3     | MYB3R-3 (myb domain protein 3R-3), MYB3R-3 (myb domain protein 3R-3); DNA binding / transcription factor                  | MYB          |
| AT3G10760 | Red |                         | myb family transcription factor                                                                                           | G2-like      |
| AT3G12480 | Red | NF-YC11                 | transcription factor, putative                                                                                            | CCAAT        |
| AT3G13810 | Red | ATIDD11                 | ATIDD11 (ARABIDOPSIS THALIANA INDETERMINATE(ID)-DOMAIN 11); nucleic acid binding / transcription factor/ zinc ion binding | C2H2         |
| AT3G16280 | Red |                         | DNA binding / transcription factor                                                                                        | AP2-EREBP    |
| AT3G20740 | Red | FIE1, FIS3, FIE         | FIE (FERTILIZATION-INDEPENDENT ENDOSPERM 1); nucleotide binding / transcription factor                                    |              |
| AT3G24050 | Red |                         | GATA transcription factor 1 (GATA-1)                                                                                      | C2C2-GATA    |
| AT3G48190 | Red | ATATM, ATM              | ATM (ATAXIA-TELANGIECTASIA MUTATED)                                                                                       |              |
| AT3G51120 | Red |                         | zinc finger (CCCH-type) family protein                                                                                    | C3H          |
| AT3G51880 | Red | NFD1, HMGB1             | HMGB1 (HIGH MOBILITY GROUP B 1), HMGB1 (HIGH MOBILITY GROUP B 1); transcription factor                                    | HMG          |
| AT3G51950 | Red |                         | RNA binding, zinc finger (CCCH-type) family protein / RNA recognition motif (RRM)-containing protein                      | C3H          |
| AT3G53920 | Red | SIG3, SIGC              | SIGC (RNA polymerase sigma subunit C); DNA binding / DNA-directed RNA polymerase/ transcription factor                    | Sigma70-like |
| AT3G54990 | Red | SMZ                     | SMZ (SCHLAFMUTZE), SMZ (SCHLAFMUTZE); DNA binding / transcription factor                                                  | AP2-EREBP    |
| AT3G58120 | Red | ATBZIP61                | bZIP transcription factor family protein                                                                                  | bZIP         |
| AT3G62420 | Red | ATBZIP53                | ATBZIP53 (BASIC REGION/LEUCINE ZIPPER MOTIF 53); DNA binding / sequence-specific DNA binding / transcription factor       | bZIP         |
| AT4G08150 | Red | BP1, KNAT1              | KNAT1 (BREVIPEDICELLUS 1); transcription factor                                                                           | HB           |
| AT4G15180 | Red | SDG2, ATXR3             | SET domain-containing protein                                                                                             | SET          |
| AT4G20400 | Red |                         | transcription factor jumonji (jnj) family protein / zinc finger (C5HC2 type) family protein                               | Jumonji      |
| AT4G21160 | Red | ZAC, AGD12              | ZAC (ARF-GAP DOMAIN 12); ARF GTPase activator                                                                             |              |
| AT4G22140 | Red | EBS                     | DNA binding                                                                                                               | PHD          |
| AT4G23980 | Red | ARF9                    | ARF9 (AUXIN RESPONSE FACTOR 9), ARF9 (AUXIN RESPONSE FACTOR 9); transcription factor                                      | ARF          |
| AT4G27240 | Red |                         | zinc finger (C2H2 type) family protein                                                                                    |              |
| AT4G28260 | Red |                         | unknown protein                                                                                                           |              |
| AT4G32551 | Red | RON2, LUG               | LUG (LEUNIG)                                                                                                              | LUG          |
| AT4G37750 | Red | DRG, CKC1, ANT          | ANT (AINTEGUMENTA); DNA binding / transcription factor                                                                    | AP2-EREBP    |
| AT5G01310 | Red | bHLH140                 | basic helix-loop-helix (bHLH) family protein                                                                              | bHLH         |
| AT5G07810 | Red |                         | SNF2 domain-containing protein / helicase domain-containing protein / HNH endonuclease domain-containing protein          | SNF2         |
| AT5G08190 | Red | NF-YB12                 | TATA-binding protein-associated phosphoprotein Dr1 protein, putative                                                      | CCAAT        |
| AT5G08630 | Red |                         | DDT domain-containing protein                                                                                             | DDT          |
| AT5G09230 | Red | SRT2                    | SRT2, SRT2; DNA binding                                                                                                   |              |
| AT5G09740 | Red | HAM2                    | histone acetyltransferase, putative                                                                                       | C2H2         |
| AT5G11510 | Red | ATMYB3R-4, AtMYB3R4     | MYB3R-4 (C-MYB-LIKE TRANSCRIPTION FACTOR 3R-4, myb domain protein 3R-4); DNA binding / transcription factor               | MYB          |
| AT5G15020 | Red | SNL2                    | unknown protein                                                                                                           |              |
| AT5G15840 | Red | FG, CO                  | CO (CONSTANS); transcription factor/ zinc ion binding, CO (CONSTANS); zinc ion binding                                    | C2C2-CO-like |
| AT5G28640 | Red | GIF1, AN3               | AN3 (ANGUSITFOLIA3)                                                                                                       |              |
| AT5G39550 | Red | ORTH1, VIM3             | zinc finger (C3HC4-type RING finger) family protein                                                                       |              |
| AT5G41920 | Red |                         | scarecrow transcription factor family protein                                                                             | GRAS         |
| AT5G42400 | Red | SDG25, ATXR7            | SET domain-containing protein (TXR7)                                                                                      | SET          |
| AT5G42630 | Red | KAN4, KANAD14, ATS      | ATS/KAN4 (ABERRANT TESTA SHAPE); DNA binding / transcription factor, unknown protein                                      | G2-like      |

miR172,

|           |           |                          |                                                                                                                                                            |              |                |
|-----------|-----------|--------------------------|------------------------------------------------------------------------------------------------------------------------------------------------------------|--------------|----------------|
| AT5G43990 | Red       | SDG18, SUVVR2            | SUVVR2; histone-lysine N-methyltransferase/ zinc ion binding                                                                                               | SET          |                |
| AT5G44080 | Red       |                          | bZIP transcription factor family protein                                                                                                                   | bZIP         |                |
| AT5G44180 | Red       |                          | homeobox transcription factor, putative                                                                                                                    | HB           |                |
| AT5G44800 | Red       | CHR4, MI-2-LIKE          | CHR4/MI-2-LIKE (chromatin remodeling 4); ATP binding / DNA binding / chromatin binding / helicase                                                          | PHD          |                |
| AT5G45300 | Red       | BAM8, BMY2               | BMY2; beta-amylase                                                                                                                                         | BES1         |                |
| AT5G47390 | Red       |                          | myb family transcription factor                                                                                                                            | MYB-related  |                |
| AT5G51190 | Red       |                          | AP2 domain-containing transcription factor, putative                                                                                                       | AP2-EREBP    |                |
| AT5G52510 | Red       | SCL8                     | scarecrow-like transcription factor 8 (SCL8)                                                                                                               | GRAS         |                |
| AT5G53430 | Red       | SET29, ATX5, SDG29       | SDG29 (SET DOMAIN GROUP 29); DNA binding                                                                                                                   | PHD          |                |
| AT5G55760 | Red       | SRT1                     | SRT1 (SIRTUIN 1); DNA binding                                                                                                                              |              |                |
| AT5G57180 | Red       | CIA2                     | CIA2 (CHLOROPLAST IMPORT APPARATUS 2)                                                                                                                      | Orphans      |                |
| AT5G58620 | Red       |                          | zinc finger (CCCH-type) family protein                                                                                                                     | C3H          |                |
| AT5G59430 | Red       | ATTRP1                   | ATTRP1 (TELOMERE REPEAT BINDING PROTEIN 1), ATTRP1 (TELOMERE REPEAT BINDING PROTEIN 1); DNA binding                                                        |              |                |
| AT5G59450 | Red       | SCL11                    | scarecrow-like transcription factor 11 (SCL11)                                                                                                             | GRAS         |                |
| AT5G63950 | Red       | CHR24                    | CHR24 (chromatin remodeling 24); ATP binding / DNA binding / helicase                                                                                      | SNF2         |                |
| AT5G65640 | Red       | bHLH093                  | BHLH093 (BETA HLH PROTEIN 93), BHLH093 (BETA HLH PROTEIN 93); DNA binding / transcription factor                                                           | bHLH         |                |
| AT5G65770 | Red       | LINC4                    | nuclear matrix constituent protein-related                                                                                                                 |              |                |
| AT5G66770 | Red       |                          | scarecrow transcription factor family protein                                                                                                              | GRAS         |                |
| AT1G43000 | Royalblue |                          | zinc-binding family protein                                                                                                                                | PLATZ        |                |
| AT1G04850 | Salmon    |                          | ubiquitin-associated (UBA)/TS-N domain-containing protein                                                                                                  |              |                |
| AT1G54830 | Salmon    | NF-YC3                   | CCAAT-box binding transcription factor Hap5a, putative                                                                                                     | CCAAT        |                |
| AT1G65620 | Salmon    | AS2                      | AS2 (ASYMMETRIC LEAVES 2), unknown protein                                                                                                                 |              |                |
| AT2G19810 | Salmon    |                          | zinc finger (CCCH-type) family protein                                                                                                                     | C3H          |                |
| AT2G30340 | Salmon    | LBD13                    | LOB domain protein 13 / lateral organ boundaries domain protein 13 (LBD13)                                                                                 |              |                |
| AT2G45420 | Salmon    | LBD18, ASL20             | LOB domain protein 18 / lateral organ boundaries domain protein 18 (LBD18)                                                                                 |              |                |
| AT2G46270 | Salmon    | GBF3                     | GBF3 (G-BOX BINDING FACTOR 3); transcription factor                                                                                                        | bZIP         |                |
| AT2G46990 | Salmon    | IAA20                    | IAA20 (indoleacetic acid-induced protein 20); transcription factor                                                                                         | AUX/IAA      |                |
| AT3G15210 | Salmon    | ATERF4, RAP2.5, ATERF-4  | ATERF-4/ATERF4/ERF4/RAP2.5 (ETHYLENE RESPONSIVE ELEMENT BINDING FACTOR 4); DNA binding / protein binding / transcription factor/ transcriptional repressor | AP2-EREBP    |                |
| AT3G62100 | Salmon    | IAA30                    | IAA30 (indoleacetic acid-induced protein 30); transcription factor                                                                                         | AUX/IAA      |                |
| AT4G11140 | Salmon    | CRF1                     | CRF1 (CYTOKININ RESPONSE FACTOR 1); DNA binding / transcription factor                                                                                     | AP2-EREBP    |                |
| AT4G17490 | Salmon    | ERF-6-6, ATERF6          | ATERF6 (ETHYLENE RESPONSIVE ELEMENT BINDING FACTOR 6); DNA binding / transcription factor                                                                  | AP2-EREBP    |                |
| AT4G28640 | Salmon    | IAA11                    | IAA11 (indoleacetic acid-induced protein 11), IAA11 (indoleacetic acid-induced protein 11); transcription factor                                           | AUX/IAA      |                |
| AT5G04840 | Salmon    |                          | bZIP protein                                                                                                                                               |              |                |
| AT5G39820 | Salmon    | ANAC094                  | ANAC094 (Arabidopsis NAC domain containing protein 94); transcription factor                                                                               | NAC          |                |
| AT5G63750 | Salmon    |                          | IBR domain-containing protein                                                                                                                              |              |                |
| AT1G03750 | Tan       | SWI2, SNF2, CHR9         | CHR9/SNF2/SWI2 (chromatin remodeling 9); helicase                                                                                                          | SNF2         |                |
| AT1G28420 | Tan       | HB-1                     | HB-1 (homeobox-1); transcription factor                                                                                                                    | HB           |                |
| AT1G70700 | Tan       | TIFY7, JAZ9              | unknown protein                                                                                                                                            | ZIM          |                |
| AT2G33480 | Tan       | ANAC041                  | ANAC041 (Arabidopsis NAC domain containing protein 41); transcription factor, unknown protein                                                              | NAC          |                |
| AT2G42200 | Tan       | SPL9                     | squamosa promoter-binding protein-like 9 (SPL9)                                                                                                            | SBP          | miR156/miR157, |
| AT3G09735 | Tan       |                          | DNA-binding S1FA family protein                                                                                                                            | S1Fa-like    |                |
| AT3G17610 | Tan       |                          |                                                                                                                                                            |              |                |
| AT3G19290 | Tan       | AREB2, ABF4              | ABF4 (ABRE BINDING FACTOR 4); DNA binding / transcription factor/ transcriptional activator                                                                | bZIP         |                |
| AT4G28140 | Tan       |                          | AP2 domain-containing transcription factor, putative                                                                                                       | AP2-EREBP    |                |
| AT4G33940 | Tan       |                          | zinc finger (C3HC4-type RING finger) family protein                                                                                                        |              |                |
| AT5G07680 | Tan       | ANAC079, ATNAC4, ANAC080 | ANAC079/ANAC080/ATNAC4 (Arabidopsis NAC domain containing protein 79, Arabidopsis NAC domain containing protein 80); transcription factor                  | NAC          | miR164,        |
| AT5G16540 | Tan       | ZFN3                     | ZFN3 (ZINC FINGER PROTEIN 3); nucleic acid binding                                                                                                         | C3H          |                |
| AT5G24120 | Tan       | ATSIG5, SIG5, SIGE       | SIGE (RNA polymerase sigma subunit E); DNA binding / DNA-directed RNA polymerase/ sigma factor/ transcription factor                                       | Sigma70-like |                |

|           |           |                                |                                                                                                                                                  |              |                |
|-----------|-----------|--------------------------------|--------------------------------------------------------------------------------------------------------------------------------------------------|--------------|----------------|
| AT5G39610 | Tan       | AtNAC2, ANAC092, ATNAC6        | ANAC092/ATNAC2/ATNAC6 (Arabidopsis NAC domain containing protein 92); protein heterodimerization/ protein homodimerization/ transcription factor | NAC          | miR164,        |
| AT5G52010 | Tan       |                                | zinc finger (C2H2 type) family protein                                                                                                           | C2H2         |                |
| AT1G01060 | Turquoise | LHY1, LHY                      | LHY (LATE ELONGATED HYPOCOTYL), LHY (LATE ELONGATED HYPOCOTYL); DNA binding, LHY (LATE ELONGATED HYPOCOTYL); DNA binding / transcription factor  | MYB-related  |                |
| AT1G01250 | Turquoise |                                | AP2 domain-containing transcription factor, putative                                                                                             | AP2-EREBP    |                |
| AT1G01260 | Turquoise | bHLH013                        | basic helix-loop-helix (bHLH) family protein                                                                                                     | bHLH         |                |
| AT1G01380 | Turquoise | ETC1                           | ETC1 (ENHANCER OF TRY AND CPC 1); DNA binding / transcription factor                                                                             | MYB-related  |                |
| AT1G02680 | Turquoise | TAF13                          | transcription initiation factor IID (TFIID) 18 kDa subunit (TAFII-18) family protein                                                             |              |                |
| AT1G04360 | Turquoise |                                | zinc finger (C3HC4-type RING finger) family protein                                                                                              |              |                |
| AT1G05230 | Turquoise | HDG2                           | homeobox-leucine zipper family protein / lipid-binding START domain-containing protein, unknown protein                                          | HB           |                |
| AT1G08000 | Turquoise |                                | zinc finger (GATA type) family protein                                                                                                           | C2C2-GATA    |                |
| AT1G08540 | Turquoise | ATSIG1, SIG1, SIGA, SIG2, SIGB | SIGB (SIGMA FACTOR B); DNA binding / DNA-directed RNA polymerase/ transcription factor                                                           | Sigma70-like |                |
| AT1G08810 | Turquoise | ATMYB60                        | MYB60 (myb domain protein 60); DNA binding, MYB60 (myb domain protein 60); DNA binding / transcription factor                                    | MYB          |                |
| AT1G08970 | Turquoise | NF-YC9, HAP5C                  | HAP5C (HEME ACTIVATED PROTEIN 5C); DNA binding, HAP5C (HEME ACTIVATED PROTEIN 5C); DNA binding / transcription factor                            | CCAAT        |                |
| AT1G09540 | Turquoise | AtMYB61                        | MYB61 (myb domain protein 61); DNA binding / transcription factor                                                                                | MYB          |                |
| AT1G12610 | Turquoise | DDF1                           | DDF1 (DWARF AND DELAYED FLOWERING 1); DNA binding / transcription factor                                                                         | AP2-EREBP    |                |
| AT1G12860 | Turquoise | SCRM2, ICE2, bHLH033           | basic helix-loop-helix (bHLH) family protein / F-box family protein                                                                              | bHLH         |                |
| AT1G14030 | Turquoise |                                | ribulose-1,5 biphosphate carboxylase oxygenase large subunit N-methyltransferase, putative                                                       | SET          |                |
| AT1G14200 | Turquoise |                                | zinc finger (C3HC4-type RING finger) family protein                                                                                              |              |                |
| AT1G14410 | Turquoise | WHY1, ATWHY1, PTAC1            | ATWHY1/PTAC1 (A. THALIANA WHIRLY 1, PLASTID TRANSCRIPTIONALLY ACTIVE1); DNA binding                                                              | PBF-2-like   |                |
| AT1G14440 | Turquoise | ATHB31                         | ATHB31; DNA binding / transcription factor, ATHB31; transcription factor                                                                         | zf-HD        |                |
| AT1G14490 | Turquoise |                                | DNA-binding protein-related                                                                                                                      |              |                |
| AT1G14580 | Turquoise |                                | zinc finger (C2H2 type) family protein                                                                                                           | C2H2         |                |
| AT1G14685 | Turquoise | BBR/BPC2, ATBPC2, BPC2         | BPC2 (BASIC PENTACYSSTEINE 2)                                                                                                                    | BBR/BPC      |                |
| AT1G14687 | Turquoise | ATHB32                         | ATHB32 (ARABIDOPSIS THALIANA HOMEBOX PROTEIN 32); DNA binding / transcription factor                                                             | zf-HD        |                |
| AT1G15720 | Turquoise | TRFL5                          | TRFL5 (TRF-LIKE 5); DNA binding / transcription factor                                                                                           | MYB-related  |                |
| AT1G16490 | Turquoise | ATMYB58                        | AtMYB58 (myb domain protein 58); DNA binding / transcription factor                                                                              | MYB          |                |
| AT1G19180 | Turquoise | TIFY10A, JAZ1                  | unknown protein                                                                                                                                  | ZIM          |                |
| AT1G20823 | Turquoise |                                | zinc finger (C3HC4-type RING finger) family protein                                                                                              |              |                |
| AT1G21740 | Turquoise |                                | unknown protein                                                                                                                                  |              |                |
| AT1G21970 | Turquoise | NF-YB9, EMB212, LEC1           | LEC1 (LEAFY COTYLEDON 1); transcription factor                                                                                                   | CCAAT        |                |
| AT1G22590 | Turquoise | AGL87                          | MADS-box family protein                                                                                                                          |              |                |
| AT1G26260 | Turquoise | CIB5, bHLH076                  | DNA binding / transcription factor, basic helix-loop-helix (bHLH) family protein                                                                 | bHLH         |                |
| AT1G26680 | Turquoise | REM17                          | transcriptional factor B3 family protein                                                                                                         | ABI3VP1      |                |
| AT1G26780 | Turquoise | ATMYB117                       | MYB117 (myb domain protein 117); transcription factor                                                                                            | MYB          |                |
| AT1G28300 | Turquoise | LEC2                           | LEC2 (LEAFY COTYLEDON 2); transcription factor                                                                                                   | ABI3VP1      |                |
| AT1G28360 | Turquoise | AtERF12                        | ATERF12/ERF12 (ERF domain protein 12); DNA binding / transcription factor/ transcriptional repressor                                             | AP2-EREBP    |                |
| AT1G28470 | Turquoise | ANA010, ANAC010, SND3, NST8    | ANAC010 (Arabidopsis NAC domain containing protein 10); transcription factor                                                                     | NAC          |                |
| AT1G30210 | Turquoise | ATTCP24, TCP24                 | TCP24; transcription factor                                                                                                                      | TCP          | miR159/miR319, |
| AT1G31310 | Turquoise |                                | hydroxyproline-rich glycoprotein family protein                                                                                                  |              |                |
| AT1G32240 | Turquoise | KAN2, KANADI2                  | KAN2 (KANADI 2); DNA binding / transcription factor                                                                                              | G2-like      |                |
| AT1G32360 | Turquoise |                                | zinc finger (CCCH-type) family protein                                                                                                           | C3H          |                |
| AT1G33760 | Turquoise |                                | AP2 domain-containing transcription factor, putative                                                                                             | AP2-EREBP    |                |
| AT1G34310 | Turquoise | ARF12                          | ARF12 (AUXIN RESPONSE FACTOR 12); transcription factor                                                                                           | ARF          |                |
| AT1G43640 | Turquoise | AtTLP5                         | AtTLP5 (TUBBY LIKE PROTEIN 5); phosphoric diester hydrolase/ transcription factor                                                                | TUB          |                |
| AT1G49010 | Turquoise |                                | myb family transcription factor                                                                                                                  | MYB          |                |
| AT1G49480 | Turquoise | REM19, RTV1                    | RTV1 (RELATED TO VERNALIZATION1 1); DNA binding / transcription factor                                                                           | ABI3VP1      |                |
| AT1G49950 | Turquoise | ATTRB1, TRB1                   | ATTRB1/TRB1 (TELOMERE REPEAT BINDING FACTOR 1); DNA binding, ATTRB1/TRB1 (TELOMERE REPEAT BINDING FACTOR 1); DNA binding / transcription factor  | MYB-related  |                |
| AT1G50600 | Turquoise | SCL5                           | SCL5; transcription factor                                                                                                                       | GRAS         |                |
| AT1G52880 | Turquoise | ATNAM, NAM, ANAC018, NARS2     | NAM (Arabidopsis NAC domain containing protein 18); transcription factor                                                                         | NAC          |                |

|           |           |                                       |                                                                                                                                                                                               |              |                |
|-----------|-----------|---------------------------------------|-----------------------------------------------------------------------------------------------------------------------------------------------------------------------------------------------|--------------|----------------|
| AT1G53170 | Turquoise | ATERF8, ATERF-8                       | ATERF-8/ATERF8 (ETHYLENE RESPONSE ELEMENT BINDING FACTOR 4); DNA binding / transcription factor/ transcriptional repressor                                                                    | AP2-EREBP    |                |
| AT1G53230 | Turquoise | TCP3                                  | TCP3 (TCP family transcription factor 3); transcription factor                                                                                                                                | TCP          | miR159/miR319, |
| AT1G53670 | Turquoise | MSRB1                                 | transcription factor-related, unknown protein                                                                                                                                                 |              |                |
| AT1G54160 | Turquoise | NFYA5, NF-YA5                         | CCAAT-binding transcription factor (CBF-B/NF-YA) family protein                                                                                                                               | CCAAT        | miR169,        |
| AT1G55110 | Turquoise | ARABIDOPSIS THALIANA INDETERMINATE    | ARABIDOPSIS THALIANA INDETERMINATE(ID)-DOMAIN 7/ATIDD7; nucleic acid binding / transcription factor/ zinc ion binding                                                                         | C2H2         |                |
| AT1G55970 | Turquoise | HAG4, HAG04, HAC6, HAC04, HAC4 ,ATHPC | histone acetyltransferase 4 (HAC4)                                                                                                                                                            | TAZ          |                |
| AT1G56170 | Turquoise | NF-YC2, ATHAP5B, HAP5B                | HAP5B (Heme activator protein (yeast) homolog 5B), HAP5B (Heme activator protein (yeast) homolog 5B); DNA binding / transcription factor                                                      | CCAAT        |                |
| AT1G59750 | Turquoise | ARF1                                  | ARF1 (AUXIN RESPONSE FACTOR 1); transcription factor                                                                                                                                          | ARF          |                |
| AT1G62310 | Turquoise |                                       | transcription factor jumonji (jnjC) domain-containing protein                                                                                                                                 | Jumonji      |                |
| AT1G62990 | Turquoise | IXR11, KNAT7                          | KNAT7 (Knotted-like Arabidopsis thaliana); DNA binding / transcription factor                                                                                                                 | HB           |                |
| AT1G63100 | Turquoise |                                       | scarecrow transcription factor family protein                                                                                                                                                 | GRAS         |                |
| AT1G63480 | Turquoise |                                       | DNA-binding family protein                                                                                                                                                                    |              |                |
| AT1G63650 | Turquoise | EGL1, ATMYC-2, EGL3                   | EGL3 (ENHANCER OF GLABRA3); DNA binding, EGL3 (ENHANCER OF GLABRA3); DNA binding / transcription factor                                                                                       | bHLH         |                |
| AT1G63820 | Turquoise |                                       | unknown protein                                                                                                                                                                               | Orphans      |                |
| AT1G64000 | Turquoise | ATWRKY56, WRKY56                      | WRKY56 (WRKY DNA-binding protein 56); transcription factor                                                                                                                                    | WRKY         |                |
| AT1G64860 | Turquoise | SIGB, SIG2, SIG1, RPOD1, SIGA         | SIGA (SIGMA FACTOR A); DNA binding / DNA-directed RNA polymerase/ transcription factor                                                                                                        | Sigma70-like |                |
| AT1G65180 | Turquoise |                                       | DC1 domain-containing protein                                                                                                                                                                 |              |                |
| AT1G66370 | Turquoise | ATMYB113                              | MYB113 (myb domain protein 113); DNA binding / transcription factor                                                                                                                           | MYB          | miR828,        |
| AT1G67100 | Turquoise | LBD40                                 | LOB domain protein 40 / lateral organ boundaries domain protein 40 (LBD40)                                                                                                                    |              |                |
| AT1G68070 | Turquoise |                                       | zinc finger (C3HC4-type RING finger) family protein                                                                                                                                           |              |                |
| AT1G68120 | Turquoise | BPC3, BBR/BPC3, ATBPC3                | ATBPC3/BBR/BPC3/BPC3 (BASIC PENTACYSTEINE 3); DNA binding / transcription factor                                                                                                              | BBR/BPC      |                |
| AT1G68190 | Turquoise |                                       | zinc finger (B-box type) family protein                                                                                                                                                       | Orphans      |                |
| AT1G68480 | Turquoise | JAG                                   | JAG (JAGGED); nucleic acid binding / zinc ion binding                                                                                                                                         |              |                |
| AT1G68510 | Turquoise | LBD42                                 | LOB domain protein 42 / lateral organ boundaries domain protein 42 (LBD42)                                                                                                                    |              |                |
| AT1G70510 | Turquoise | ATK1, KNAT2                           | KNAT2 (KNOTTED-LIKE FROM ARABIDOPSIS THALIANA 2); transcription factor                                                                                                                        | HB           |                |
| AT1G72220 | Turquoise |                                       | zinc finger (C3HC4-type RING finger) family protein                                                                                                                                           |              |                |
| AT1G72830 | Turquoise | NF-YA3, ATHAP2C, HAP2C                | HAP2C (Heme activator protein (yeast) homolog 2C); transcription factor                                                                                                                       | CCAAT        | miR169,        |
| AT1G73360 | Turquoise | ATHDG11, HDG11, EDT1                  | homeobox-leucine zipper family protein / lipid-binding START domain-containing protein                                                                                                        | HB           |                |
| AT1G73870 | Turquoise | COL7                                  | zinc finger (B-box type) family protein                                                                                                                                                       | C2C2-CO-like |                |
| AT1G74890 | Turquoise | ARR15                                 | ARR15 (RESPONSE REGULATOR 15); transcription regulator                                                                                                                                        | Orphans      |                |
| AT1G74930 | Turquoise | ORA47                                 | AP2 domain-containing transcription factor, putative                                                                                                                                          | AP2-EREBP    |                |
| AT1G74950 | Turquoise | TIFY10B, JAZ2                         | unknown protein                                                                                                                                                                               | ZIM          |                |
| AT1G75240 | Turquoise | ATHB33                                | ATHB33 (ARABIDOPSIS THALIANA HOMEBOX PROTEIN 33); DNA binding / transcription factor                                                                                                          | zf-HD        |                |
| AT1G75710 | Turquoise |                                       | zinc finger (C2H2 type) family protein                                                                                                                                                        | C2H2         |                |
| AT1G76110 | Turquoise |                                       | high mobility group (HMG1/2) family protein / ARID/BRIGHT DNA-binding domain-containing protein                                                                                               | ARID         |                |
| AT1G76420 | Turquoise | NAC368, CUC3, ANAC031                 | CUC3 (CUP SHAPED COTYLEDON3); transcription factor                                                                                                                                            | NAC          |                |
| AT1G76510 | Turquoise |                                       | ARID/BRIGHT DNA-binding domain-containing protein                                                                                                                                             | ARID         |                |
| AT1G77200 | Turquoise |                                       | AP2 domain-containing transcription factor TINY, putative                                                                                                                                     | AP2-EREBP    |                |
| AT1G79840 | Turquoise | GL2                                   | GL2 (GLABRA 2); DNA binding / transcription factor                                                                                                                                            | HB           |                |
| AT2G01930 | Turquoise | BPC1, BBR/BPC1, ATBPC1                | ATBPC1/BBR/BPC1/BPC1 (BASIC PENTACYSTEINE1), ATBPC1/BBR/BPC1/BPC1 (BASIC PENTACYSTEINE1); DNA binding / specific transcriptional repressor/ transcription factor                              | BBR/BPC      |                |
| AT2G01940 | Turquoise | SGR5, ATIDD15                         | SGR5 (SHOOT GRAVITROPISM 5), SGR5 (SHOOT GRAVITROPISM 5); nucleic acid binding / transcription factor/ zinc ion binding, SGR5 (SHOOT GRAVITROPISM 5); nucleic acid binding / zinc ion binding | C2H2         |                |
| AT2G02060 | Turquoise |                                       | calcium-dependent protein kinase-related / CDPK-related                                                                                                                                       | G2-like      |                |
| AT2G02070 | Turquoise | ATIDD5                                | ATIDD5 (ARABIDOPSIS THALIANA INDETERMINATE(ID)-DOMAIN 5); nucleic acid binding / transcription factor/ zinc ion binding                                                                       | C2H2         |                |
| AT2G02080 | Turquoise | ATIDD4                                | ATIDD4 (ARABIDOPSIS THALIANA INDETERMINATE(ID)-DOMAIN 4); transcription factor, unknown protein                                                                                               | C2H2         |                |
| AT2G02470 | Turquoise | AL6                                   | PHD finger family protein                                                                                                                                                                     | Alfin-like   |                |
| AT2G02540 | Turquoise | ATHB21, ZFHD4                         | ATHB21/ZFHD4 (ZINC FINGER HOMEODOMAIN 4); DNA binding / transcription factor                                                                                                                  | zf-HD        |                |
| AT2G03470 | Turquoise |                                       | myb family transcription factor / ELM2 domain-containing protein                                                                                                                              | MYB-related  |                |
| AT2G05160 | Turquoise |                                       | zinc finger (CCCH-type) family protein / RNA recognition motif (RRM)-containing protein                                                                                                       | C3H          |                |

|           |           |                             |                                                                                                                                  |              |                |
|-----------|-----------|-----------------------------|----------------------------------------------------------------------------------------------------------------------------------|--------------|----------------|
| AT2G15530 | Turquoise |                             | unknown protein, zinc finger (C3HC4-type RING finger) family protein                                                             |              |                |
| AT2G15880 | Turquoise |                             | leucine-rich repeat family protein / extensin family protein                                                                     |              |                |
| AT2G16390 | Turquoise | DMS1, CHR35, DRD1           | DRD1 (DEFECTIVE IN RNA-DIRECTED DNA METHYLATION 1); ATP binding / DNA binding / helicase/ nucleic acid binding                   | SNF2         |                |
| AT2G17450 | Turquoise | RHA3A                       | RHA3A (RING-H2 finger A3A); protein binding / zinc ion binding                                                                   |              |                |
| AT2G18650 | Turquoise | MEE16                       | MEE16 (maternal effect embryo arrest 16); protein binding / zinc ion binding                                                     |              |                |
| AT2G18850 | Turquoise |                             | unknown protein                                                                                                                  | SET          |                |
| AT2G20570 | Turquoise | GLK1, GPR11                 | GPR11 (GOLDEN2-LIKE 1); transcription factor                                                                                     | G2-like      |                |
| AT2G21240 | Turquoise | BPC4, BBR/BPC4, ATBPC4      | ATBPC4/BBR/BPC4/BPC4 (BASIC PENTACYSSTEINE 4), ATBPC4/BBR/BPC4/BPC4 (BASIC PENTACYSSTEINE 4); DNA binding / transcription factor | BBR/BPC      |                |
| AT2G21320 | Turquoise |                             | zinc finger (B-box type) family protein                                                                                          | Orphans      |                |
| AT2G21530 | Turquoise |                             | forkhead-associated domain-containing protein / FHA domain-containing protein                                                    | FHA          |                |
| AT2G21650 | Turquoise | ATRL2, MEE3                 | MEE3 (maternal effect embryo arrest 3); DNA binding / transcription factor                                                       |              |                |
| AT2G22670 | Turquoise | IAA8                        | IAA8 (indoleacetic acid-induced protein 8), IAA8 (indoleacetic acid-induced protein 8); transcription factor                     | AUX/IAA      |                |
| AT2G22740 | Turquoise | SDG23, SUVH6                | SUVH6 (SU(VAR)3-9 homolog 6)                                                                                                     | SET          | miR778,        |
| AT2G22800 | Turquoise | HAT9                        | HAT9 (homeobox-leucine zipper protein 9); DNA binding / transcription factor                                                     | HB           |                |
| AT2G22840 | Turquoise | ATGRF1                      | AtGRF1 (GROWTH-REGULATING FACTOR 1)                                                                                              | GRF          | miR396,        |
| AT2G22900 | Turquoise |                             | galactosyl transferase GMA12/MNN10 family protein                                                                                |              |                |
| AT2G23750 | Turquoise |                             |                                                                                                                                  |              |                |
| AT2G23760 | Turquoise | BLH4, SAW2                  | BLH4 (BLH4); DNA binding, BLH4 (BLH4); DNA binding / transcription factor                                                        | HB           |                |
| AT2G24430 | Turquoise | ANAC039, ANAC038            | no apical meristem (NAM) family protein                                                                                          | NAC          |                |
| AT2G24650 | Turquoise | REM13                       | transcriptional factor B3 family protein                                                                                         | ABI3VP1      |                |
| AT2G25620 | Turquoise |                             | protein phosphatase 2C, putative / PP2C, putative                                                                                | DBP          |                |
| AT2G25650 | Turquoise |                             | DNA-binding storekeeper protein-related                                                                                          | GeBP         |                |
| AT2G26150 | Turquoise | ATHSFA2                     | ATHSFA2 (Arabidopsis thaliana heat shock transcription factor A2); DNA binding / transcription factor, unknown protein           | HSF          |                |
| AT2G26580 | Turquoise | YAB5                        | plant-specific transcription factor YABBY family protein                                                                         | C2C2-YABBY   |                |
| AT2G27940 | Turquoise |                             | zinc finger (C3HC4-type RING finger) family protein                                                                              |              |                |
| AT2G27990 | Turquoise | PNF, BLH8                   | BLH8 (BEL1-LIKE HOMEODOMAIN 8); DNA binding / transcription factor                                                               | HB           |                |
| AT2G30130 | Turquoise | PCK1, LBD12, ASL5           | ASL5 (phosphoenolpyruvate carboxykinase 1)                                                                                       |              |                |
| AT2G30420 | Turquoise | ETC2                        | myb family transcription factor                                                                                                  | MYB-related  |                |
| AT2G30470 | Turquoise | HSI2, VAL1                  | HSI2 (High-level expression of Sugar-Inducible gene 2); transcription factor/ transcriptional repressor                          | ABI3VP1      |                |
| AT2G30580 | Turquoise | DRIP2                       | zinc finger (C3HC4-type RING finger) family protein                                                                              |              |                |
| AT2G32460 | Turquoise | ATMYB101, AtM1              | AtM1/AtMYB101/MYB101 (myb domain protein 101), AtM1/AtMYB101/MYB101 (myb domain protein 101); DNA binding / transcription factor | MYB          | miR159/miR319, |
| AT2G33880 | Turquoise | STIP, WOX9, HB-3            | WOX9 (STIMPY); transcription factor                                                                                              | HB           |                |
| AT2G35160 | Turquoise | SGD9, SUVH5                 | SUVH5 (SU(VAR)3-9 HOMOLOG 5)                                                                                                     | SET          | miR778,        |
| AT2G35310 | Turquoise |                             | transcriptional factor B3 family protein                                                                                         | ABI3VP1      |                |
| AT2G35530 | Turquoise |                             | bZIP transcription factor family protein                                                                                         | bZIP         |                |
| AT2G36400 | Turquoise | ATGRF3                      | AtGRF3 (GROWTH-REGULATING FACTOR 3)                                                                                              | GRF          | miR396,        |
| AT2G36960 | Turquoise | TKI1                        | TKI1 (TSL-KINASE INTERACTING PROTEIN 1); DNA binding / transcription factor                                                      | MYB-related  |                |
| AT2G36990 | Turquoise | SIG6, SIGF                  | SIGF (RNA POLYMERASE SIGMA-70 FACTOR); DNA binding / DNA-directed RNA polymerase/ transcription factor                           | Sigma70-like |                |
| AT2G37120 | Turquoise |                             | DNA-binding S1FA family protein                                                                                                  | S1Fa-like    |                |
| AT2G37260 | Turquoise | DSL1, ATWRKY44, TTG2        | TTG2 (TRANSPARENT TESTA GLABRA 2), TTG2 (TRANSPARENT TESTA GLABRA 2); transcription factor                                       | WRKY         |                |
| AT2G37580 | Turquoise |                             | zinc finger (C3HC4-type RING finger) family protein                                                                              |              |                |
| AT2G37630 | Turquoise | AtPHAN, AtMYB91, MYB91, AS1 | AS1 (ASYMMETRIC LEAVES 1); DNA binding / transcription factor                                                                    | MYB          |                |
| AT2G37650 | Turquoise | SCL9                        | scarecrow-like transcription factor 9 (SCL9)                                                                                     | GRAS         |                |
| AT2G39250 | Turquoise | SNZ                         | SNZ (SCHNARCHZAPFEN); DNA binding / transcription factor                                                                         | AP2-EREBP    | miR172,        |
| AT2G40435 | Turquoise |                             | unknown protein                                                                                                                  |              |                |
| AT2G40620 | Turquoise | AtbZIP18                    | bZIP transcription factor family protein                                                                                         | bZIP         |                |
| AT2G40670 | Turquoise | ARR16                       | ARR16 (response regulator 16); transcription regulator/ two-component response regulator                                         | Orphans      |                |
| AT2G41070 | Turquoise | DPBF4, ATBZIP12, EEL        | EEL (ENHANCED EM LEVEL); DNA binding / transcription factor                                                                      | bZIP         |                |
| AT2G41940 | Turquoise | ZFP8                        | ZFP8 (ZINC FINGER PROTEIN 8); nucleic acid binding / transcription factor/ zinc ion binding                                      | C2H2         |                |

|           |           |                        |                                                                                                                                                                                                                              |                       |
|-----------|-----------|------------------------|------------------------------------------------------------------------------------------------------------------------------------------------------------------------------------------------------------------------------|-----------------------|
| AT2G42380 | Turquoise | ATBZIP34               | bZIP transcription factor family protein                                                                                                                                                                                     | bZIP                  |
| AT2G42830 | Turquoise | AGL5, SHP2             | SHP2 (SHATTERPROOF 2); transcription factor                                                                                                                                                                                  | MADS                  |
| AT2G43010 | Turquoise | SRL2, PIF4             | PIF4 (PHYTOCHROME INTERACTING FACTOR 4); DNA binding / transcription factor                                                                                                                                                  | bHLH                  |
| AT2G43060 | Turquoise | bHLH158                | transcription factor                                                                                                                                                                                                         |                       |
| AT2G44840 | Turquoise | ATERF13, EREBP         | ATERF13/EREBP (ETHYLENE-RESPONSIVE ELEMENT BINDING FACTOR 13); DNA binding / transcription factor                                                                                                                            | AP2-EREBP             |
| AT2G44910 | Turquoise | ATHB4, ATHB-4          | homeobox-leucine zipper protein 4 (HB-4) / HD-ZIP protein 4                                                                                                                                                                  | HB                    |
| AT2G45100 | Turquoise |                        | RNA polymerase II transcription factor                                                                                                                                                                                       |                       |
| AT2G45190 | Turquoise | FIL, YAB1, AFO         | AFO (ABNORMAL FLORAL ORGANS); transcription factor                                                                                                                                                                           | C2C2-YABBY            |
| AT2G45680 | Turquoise | TCP9                   | TCP family transcription factor, putative                                                                                                                                                                                    | TCP                   |
| AT2G45850 | Turquoise |                        | DNA-binding family protein                                                                                                                                                                                                   |                       |
| AT2G46020 | Turquoise | CHA2, ATBRM, CHR2, BRM | ATBRM/CHR2 (ARABIDOPSIS THALIANA BRAHMA); ATP binding / DNA binding / helicase/ transcription regulator                                                                                                                      | SNF2                  |
| AT2G46130 | Turquoise | ATWRKY43, WRKY43       | WRKY43 (WRKY DNA-binding protein 43); transcription factor                                                                                                                                                                   | WRKY                  |
| AT2G46530 | Turquoise | ARF11                  | ARF11 (AUXIN RESPONSE FACTOR 11); transcription factor                                                                                                                                                                       | ARF                   |
| AT2G46830 | Turquoise | CCA1                   | CCA1 (CIRCADIAN CLOCK ASSOCIATED 1); transcription factor                                                                                                                                                                    | MYB-related           |
| AT3G02150 | Turquoise | TFPD, PTF1, TCP13      | PTF1 (PLASTID TRANSCRIPTION FACTOR 1); transcription factor                                                                                                                                                                  | TCP                   |
| AT3G02290 | Turquoise |                        | zinc finger (C3HC4-type RING finger) family protein                                                                                                                                                                          |                       |
| AT3G02310 | Turquoise | 2-Sep, AGL4, SEP2      | SEP2 (SEPALLATA2); DNA binding / transcription factor                                                                                                                                                                        | MADS                  |
| AT3G02380 | Turquoise | COL2                   | COL2 (CONSTANS-LIKE 2); transcription factor/ zinc ion binding                                                                                                                                                               | C2C2-CO-like          |
| AT3G02400 | Turquoise |                        | forkhead-associated domain-containing protein / FHA domain-containing protein / AT hook motif-containing protein                                                                                                             | FHA                   |
| AT3G02890 | Turquoise |                        | PHD finger protein-related                                                                                                                                                                                                   |                       |
| AT3G02940 | Turquoise | ATMYB107               | MYB107 (myb domain protein 107); DNA binding / transcription factor                                                                                                                                                          | MYB                   |
| AT3G04280 | Turquoise | ARR22                  | ARR22 (ARABIDOPSIS RESPONSE REGULATOR 22), ARR22 (ARABIDOPSIS RESPONSE REGULATOR 22); transcription regulator/ two-component response regulator, ARR22 (ARABIDOPSIS RESPONSE REGULATOR 22); two-component response regulator | Orphans               |
| AT3G05150 | Turquoise |                        | sugar transporter family protein                                                                                                                                                                                             |                       |
| AT3G06160 | Turquoise |                        | transcriptional factor B3 family protein                                                                                                                                                                                     | ABI3VP1               |
| AT3G06220 | Turquoise | REM21                  | DNA binding / transcription factor                                                                                                                                                                                           | ABI3VP1               |
| AT3G07200 | Turquoise |                        | protein binding / zinc ion binding, zinc finger (C3HC4-type RING finger) family protein                                                                                                                                      |                       |
| AT3G09670 | Turquoise |                        | PWWP domain-containing protein                                                                                                                                                                                               |                       |
| AT3G10040 | Turquoise |                        | transcription factor                                                                                                                                                                                                         |                       |
| AT3G10590 | Turquoise |                        | myb family transcription factor                                                                                                                                                                                              | MYB                   |
| AT3G12560 | Turquoise | ATTBP2, TRFL9          | TRFL9 (TRF-LIKE 9); DNA binding                                                                                                                                                                                              |                       |
| AT3G13540 | Turquoise | ATMYB5, ATM2           | ATMYB5 (myb domain protein 5); DNA binding / transcription factor                                                                                                                                                            | MYB                   |
| AT3G13960 | Turquoise | ATGRF5                 | AtGRF5 (GROWTH-REGULATING FACTOR 5)                                                                                                                                                                                          | GRF                   |
| AT3G14020 | Turquoise | NF-YA6                 | CCAAT-binding transcription factor (CBF-B/NF-YA) family protein                                                                                                                                                              | CCAAT                 |
| AT3G14980 | Turquoise |                        | PHD finger transcription factor, putative                                                                                                                                                                                    | PHD                   |
| AT3G15030 | Turquoise | TCP4, MEE35            | TCP4 (TCP family transcription factor 4, maternal effect embryo arrest 35); transcription factor                                                                                                                             | TCP                   |
| AT3G15500 | Turquoise | ATNAC3, ANAC055        | ATNAC3 (ARABIDOPSIS NAC DOMAIN CONTAINING PROTEIN 55); transcription factor                                                                                                                                                  | miR159/miR319,<br>NAC |
| AT3G15510 | Turquoise | ATNAC2, ANAC056, NARS1 | ATNAC2 (Arabidopsis thaliana NAC domain containing protein 2); transcription factor                                                                                                                                          | NAC                   |
| AT3G16090 | Turquoise |                        | zinc finger (C3HC4-type RING finger) family protein                                                                                                                                                                          |                       |
| AT3G17600 | Turquoise | IAA31                  | IAA31 (indoleacetic acid-induced protein 31); transcription factor                                                                                                                                                           | AUX/IAA               |
| AT3G18100 | Turquoise | ATMYB4R1               | MYB4R1 (myb domain protein 4R1); transcription factor                                                                                                                                                                        | MYB                   |
| AT3G18930 | Turquoise |                        | zinc finger (C3HC4-type RING finger) family protein                                                                                                                                                                          |                       |
| AT3G18960 | Turquoise |                        | transcriptional factor B3 family protein                                                                                                                                                                                     | ABI3VP1               |
| AT3G19500 | Turquoise | bHLH113                | ethylene-responsive protein -related                                                                                                                                                                                         |                       |
| AT3G20670 | Turquoise | HTA13                  | histone H2A, putative                                                                                                                                                                                                        | CCAAT                 |
| AT3G20910 | Turquoise | NF-YA9                 | CCAAT-binding transcription factor (CBF-B/NF-YA) family protein                                                                                                                                                              | CCAAT                 |
| AT3G21890 | Turquoise |                        | zinc finger (B-box type) family protein                                                                                                                                                                                      | Orphans               |
| AT3G22760 | Turquoise | SOL1                   | SOL1 (TSO1-Like); transcription factor                                                                                                                                                                                       | CPP                   |
| AT3G24340 | Turquoise | CHR40                  | CHR40 (chromatin remodeling 40); ATP binding / DNA binding / helicase                                                                                                                                                        | SNF2                  |
| AT3G24490 | Turquoise |                        | transcription factor                                                                                                                                                                                                         | Trihelix              |



|           |           |                             |                                                                                                                         |            |                |
|-----------|-----------|-----------------------------|-------------------------------------------------------------------------------------------------------------------------|------------|----------------|
| AT3G24500 | Turquoise | MBF1C, ATMBF1C              | ATMBF1C/MBF1C (MULTIPROTEIN BRIDGING FACTOR 1C); DNA binding / transcription coactivator/ transcription factor          | MBF1       |                |
| AT3G24650 | Turquoise | SIS10, ABI3                 | ABI3 (ABA INSENSITIVE 3); DNA binding / transcription factor/ transcriptional activator                                 | ABI3VP1    |                |
| AT3G26744 | Turquoise | SCRM, ATICE1, ICE1, bHLH116 | ICE1 (INDUCER OF CBF EXPRESSION 1); DNA binding, ICE1 (INDUCER OF CBF EXPRESSION 1); DNA binding / transcription factor | bHLH       |                |
| AT3G26790 | Turquoise | FUS3                        | FUS3 (FUSCA 3); DNA binding / transcription factor                                                                      | ABI3VP1    |                |
| AT3G27780 | Turquoise | MYB118,                     |                                                                                                                         |            |                |
| AT3G27785 | Turquoise | ATMYB118                    | MYB118 (myb domain protein 118); DNA binding / transcription factor                                                     | MYB        |                |
| AT3G30460 | Turquoise |                             | zinc finger (C3HC4-type RING finger) family protein                                                                     |            |                |
| AT3G44460 | Turquoise | DPBF2, ATBZIP67             | DPBF2 (BASIC LEUCINE ZIPPER TRANSCRIPTION FACTOR 67); DNA binding / transcription factor                                | bZIP       |                |
| AT3G45260 | Turquoise |                             | zinc finger (C2H2 type) family protein                                                                                  | C2H2       |                |
| AT3G45610 | Turquoise | AtDof3,2                    | Dof-type zinc finger domain-containing protein                                                                          | C2C2-Dof   |                |
| AT3G47600 | Turquoise | ATMYB94, AtMYBCP70          | MYB94 (myb domain protein 94); DNA binding / transcription factor                                                       | MYB        |                |
| AT3G48440 | Turquoise |                             | zinc finger (CCCH-type) family protein                                                                                  | C3H        |                |
| AT3G49530 | Turquoise | ANAC062                     | ANAC062 (Arabidopsis NAC domain containing protein 62); transcription factor                                            | NAC        |                |
| AT3G49930 | Turquoise |                             | zinc finger (C2H2 type) family protein                                                                                  | C2H2       |                |
| AT3G49950 | Turquoise |                             | scarecrow transcription factor family protein                                                                           | GRAS       |                |
| AT3G50060 | Turquoise | ATMYB77                     | myb family transcription factor                                                                                         | MYB        |                |
| AT3G50890 | Turquoise | ATHB28                      | ATHB28 (ARABIDOPSIS THALIANA HOMEBOX PROTEIN 28); DNA binding / transcription factor                                    | zF-HD      |                |
| AT3G52910 | Turquoise | ATGRF4                      | AtGRF4 (GROWTH-REGULATING FACTOR 4)                                                                                     | GRF        | miR396,        |
| AT3G53310 | Turquoise | REM20                       | transcriptional factor B3 family protein                                                                                | ABI3VP1    |                |
| AT3G53370 | Turquoise |                             | DNA-binding S1FA family protein                                                                                         | S1Fa-like  |                |
| AT3G53680 | Turquoise |                             | PHD finger transcription factor, putative                                                                               | PHD        |                |
| AT3G54220 | Turquoise | SGR1, SCR                   | SCR (SCARECROW); transcription factor                                                                                   | GRAS       |                |
| AT3G54320 | Turquoise | ASML1, WR11                 | WR11 (WRINKLED 1); DNA binding / transcription factor                                                                   | AP2-EREBP  |                |
| AT3G54340 | Turquoise | AP3                         | AP3 (APETALA 3); DNA binding / transcription factor                                                                     | MADS       |                |
| AT3G54390 | Turquoise |                             | transcription factor                                                                                                    | Trihelix   |                |
| AT3G55980 | Turquoise | ATSZF1                      | zinc finger (CCCH-type) family protein                                                                                  | C3H        |                |
| AT3G56850 | Turquoise | DPBF3, AREB3                | AREB3 (ABA-RESPONSIVE ELEMENT BINDING PROTEIN 3); DNA binding / transcription factor/ transcriptional activator         | bZIP       |                |
| AT3G57600 | Turquoise |                             | AP2 domain-containing transcription factor, putative                                                                    | AP2-EREBP  |                |
| AT3G57920 | Turquoise | SPL15, MSC1                 | squamosa promoter-binding protein, putative                                                                             | SBP        | miR156/miR157, |
| AT3G58070 | Turquoise | GIS                         | GIS (GLABROUS INFLORESCENCE STEMS); nucleic acid binding / transcription factor/ zinc ion binding                       | C2H2       |                |
| AT3G58780 | Turquoise | AGL1, SHP1                  | SHP1 (SHATTERPROOF 1), SHP1 (SHATTERPROOF 1); DNA binding / transcription factor                                        | MADS       |                |
| AT3G60390 | Turquoise | HAT3                        | HAT3 (homeobox-leucine zipper protein 3); transcription factor                                                          | HB         |                |
| AT3G61150 | Turquoise | HD-GL2-1, HDG1              | HDG1 (HOMEODOMAIN GLABROUS1); DNA binding / transcription factor                                                        | HB         |                |
| AT3G61250 | Turquoise | ATMYB17                     | AtMYB17 (myb domain protein 17); DNA binding / transcription factor                                                     | MYB        |                |
| AT3G61310 | Turquoise |                             | DNA-binding family protein                                                                                              |            |                |
| AT3G61830 | Turquoise | ARF18                       | ARF18 (AUXIN RESPONSE FACTOR 18); transcription factor                                                                  | ARF        |                |
| AT3G61970 | Turquoise | NGA2                        | NGA2 (NGATHA2); transcription factor                                                                                    | ABI3VP1    |                |
| AT3G62260 | Turquoise |                             | protein phosphatase 2C, putative / PP2C, putative                                                                       | DBP        |                |
| AT3G63350 | Turquoise | AT-HSFA7B                   | AT-HSFA7B (Arabidopsis thaliana heat shock transcription factor A7B); DNA binding / transcription factor                | HSF        |                |
| AT4G00180 | Turquoise | YAB3                        | YAB3 (YABBY3), YAB3 (YABBY3); transcription factor                                                                      | C2C2-YABBY |                |
| AT4G00220 | Turquoise | JLO, LBD30, ASL19           | LOB domain protein 30 / lateral organ boundaries domain protein 30 (LBD30)                                              |            |                |
| AT4G00238 | Turquoise |                             | DNA-binding storekeeper protein-related                                                                                 | GeBP       |                |
| AT4G00270 | Turquoise |                             | DNA-binding storekeeper protein-related                                                                                 | GeBP       |                |
| AT4G00480 | Turquoise | ATMYC1                      | ATMYC1 (Arabidopsis thaliana myc-related transcription factor 1); DNA binding / transcription factor                    | bHLH       |                |
| AT4G00730 | Turquoise | AHDP, ANL2                  | ANL2 (ANTHOCYANINLESS 2); transcription factor, unknown protein                                                         | HB         |                |
| AT4G01250 | Turquoise | ATWRKY22, WRKY22            | WRKY22 (WRKY DNA-binding protein 22); transcription factor                                                              | WRKY       |                |
| AT4G01460 | Turquoise | bHLH057                     | basic helix-loop-helix (bHLH) family protein                                                                            | bHLH       |                |
| AT4G04890 | Turquoise | PDF2                        | PDF2 (PROTODERMAL FACTOR2); DNA binding / transcription factor                                                          | HB         |                |
| AT4G09820 | Turquoise | TT8, bHLH042                | TT8 (TRANSPARENT TESTA 8); DNA binding / transcription factor                                                           | bHLH       |                |
| AT4G09960 | Turquoise | AGL11, STK                  | STK (SEEDSTICK), STK (SEEDSTICK); transcription factor                                                                  | MADS       |                |
| AT4G10150 | Turquoise |                             | zinc finger (C3HC4-type RING finger) family protein                                                                     |            |                |
| AT4G11080 | Turquoise |                             | high mobility group (HMG1/2) family protein                                                                             | HMG        |                |

|           |           |                                               |                                                                                                                                     |              |                |
|-----------|-----------|-----------------------------------------------|-------------------------------------------------------------------------------------------------------------------------------------|--------------|----------------|
| AT4G11400 | Turquoise |                                               | ARID/BRIGHT DNA-binding domain-containing protein / ELM2 domain-containing protein / Myb-like DNA-binding domain-containing protein | ARID         |                |
| AT4G14540 | Turquoise | NF-YB3                                        | CCAAT-box binding transcription factor subunit B (NF-YB) (HAP3 ) (AHAP3) family                                                     | CCAAT        |                |
| AT4G14770 | Turquoise | ATTXC2                                        | tesmin/TSO1-like CXC domain-containing protein                                                                                      | CPP          |                |
| AT4G16610 | Turquoise |                                               | zinc finger (C2H2 type) family protein                                                                                              |              |                |
| AT4G17600 | Turquoise | LIL3:1                                        | LIL3:1; transcription factor                                                                                                        |              |                |
| AT4G17810 | Turquoise | ZFP12                                         | nucleic acid binding / transcription factor/ zinc ion binding                                                                       | C2H2         |                |
| AT4G18020 | Turquoise | APRR2                                         | APRR2 (PSEUDO-RESPONSE REGULATOR 2), APRR2 (PSEUDO-RESPONSE REGULATOR 2); transcription factor                                      | ARR-B        |                |
| AT4G18390 | Turquoise | TCP2                                          | TCP family transcription factor, putative                                                                                           | TCP          | miR159/miR319, |
| AT4G18770 | Turquoise | ATMYB98                                       | MYB98 (myb domain protein 98); DNA binding / transcription factor                                                                   | MYB          |                |
| AT4G19510 | Turquoise |                                               | disease resistance protein (TIR-NBS-LRR class), putative                                                                            |              |                |
| AT4G21050 | Turquoise | AtDof4,4                                      | Dof-type zinc finger domain-containing protein                                                                                      | C2C2-Dof     |                |
| AT4G21430 | Turquoise | B160                                          | B160; transcription factor                                                                                                          | Orphans      |                |
| AT4G21750 | Turquoise | ATML1                                         | ATML1 (MERISTEM LAYER 1); DNA binding, ATML1 (MERISTEM LAYER 1); DNA binding / transcription factor                                 | HB           |                |
| AT4G23800 | Turquoise | AT4G23800                                     | high mobility group (HMGI/2) family protein                                                                                         | HMG          |                |
| AT4G24660 | Turquoise | ATHB22, MEE68                                 | ATHB22/MEE68 (ARABIDOPSIS THALIANA HOMEBOX PROTEIN 22, maternal effect embryo arrest 68); DNA binding / transcription factor        | zF-HD        |                |
| AT4G25470 | Turquoise | DREB1C, FTQ4, CBF2                            | CBF2 (FREEZING TOLERANCE QTL 4); DNA binding / transcription factor/ transcriptional activator                                      | AP2-EREBP    |                |
| AT4G25490 | Turquoise | DREB1B, CBF1                                  | CBF1 (C-REPEAT/DRE BINDING FACTOR 1); DNA binding / transcription factor/ transcriptional activator                                 | AP2-EREBP    |                |
| AT4G27230 | Turquoise | HTA2                                          | histone H2A, putative                                                                                                               | CCAAT        |                |
| AT4G27410 | Turquoise | RD26, ANAC072                                 | RD26 (RESPONSIVE TO DESSICATION 26), RD26 (RESPONSIVE TO DESSICATION 26); transcription factor                                      |              |                |
| AT4G27900 | Turquoise |                                               | unknown protein                                                                                                                     | Orphans      |                |
| AT4G28190 | Turquoise | ULT1                                          | ULT1 (ULTRAPETALA1); DNA binding                                                                                                    | ULT          |                |
| AT4G29030 | Turquoise |                                               | glycine-rich protein                                                                                                                |              |                |
| AT4G29230 | Turquoise | ANAC075, NST9                                 | ANAC075 (Arabidopsis NAC domain containing protein 75); transcription factor                                                        | NAC          |                |
| AT4G31060 | Turquoise |                                               | AP2 domain-containing transcription factor, putative                                                                                | AP2-EREBP    |                |
| AT4G31270 | Turquoise |                                               | transcription factor                                                                                                                |              |                |
| AT4G31620 | Turquoise | REM2                                          | transcriptional factor B3 family protein                                                                                            | ABI3VP1      |                |
| AT4G31680 | Turquoise | REM8                                          | transcriptional factor B3 family protein                                                                                            | ABI3VP1      |                |
| AT4G32710 | Turquoise |                                               | kinase                                                                                                                              |              |                |
| AT4G32800 | Turquoise |                                               | AP2 domain-containing transcription factor TINY, putative                                                                           | AP2-EREBP    |                |
| AT4G32980 | Turquoise | ATH1                                          | ATH1 (ARABIDOPSIS THALIANA HOMEBOX GENE 1); transcription factor                                                                    | HB           |                |
| AT4G33280 | Turquoise | REM16                                         | DNA binding / transcription factor                                                                                                  | ABI3VP1      |                |
| AT4G34410 | Turquoise | RRTF1 (Redox Responsive Transcription Factor) | AP2 domain-containing transcription factor, putative                                                                                | AP2-EREBP    |                |
| AT4G34430 | Turquoise | ATSWI3D, CHB3                                 | CHB3 (Arabidopsis thaliana switch 3D); DNA binding / transcription factor                                                           | MYB-related  |                |
| AT4G34590 | Turquoise | ATB2, ATBZIP11, BZIP11, GBF6                  | GBF6 (G-box binding factor 6); DNA binding / transcription factor                                                                   | bZIP         |                |
| AT4G34680 | Turquoise |                                               | GATA transcription factor 3, putative (GATA-3)                                                                                      | C2C2-GATA    |                |
| AT4G35590 | Turquoise | RKD5                                          | RWP-RK domain-containing protein                                                                                                    | RWP-RK       |                |
| AT4G36870 | Turquoise | BLH2, SAW1                                    | BLH2 (BEL1-LIKE HOMEODOMAIN 2); DNA binding, BLH2 (BEL1-LIKE HOMEODOMAIN 2); DNA binding / transcription factor                     | HB           |                |
| AT4G36930 | Turquoise | SPT, bHLH024                                  | SPT (SPATULA); DNA binding / transcription factor                                                                                   | bHLH         |                |
| AT4G37740 | Turquoise | ATGRF2                                        | AtGRF2 (GROWTHREGULATING FACTOR 2)                                                                                                  | GRF          | miR396,        |
| AT4G38000 | Turquoise | AtDof4,7                                      | Dof-type zinc finger domain-containing protein                                                                                      | C2C2-Dof     |                |
| AT5G01200 | Turquoise |                                               | myb family transcription factor                                                                                                     | MYB          |                |
| AT5G01980 | Turquoise |                                               | zinc finger (C3HC4-type RING finger) family protein                                                                                 |              |                |
| AT5G02810 | Turquoise | APRR7, PRR7                                   | PRR7 (PSEUDO-RESPONSE REGULATOR 7); transcription regulator                                                                         | Pseudo ARR-B |                |
| AT5G03150 | Turquoise | JKD                                           | zinc finger (C2H2 type) family protein                                                                                              | C2H2         |                |
| AT5G04240 | Turquoise | ELF6                                          | ELF6 (EARLY FLOWERING 6); transcription factor                                                                                      | Jumonji      |                |
| AT5G04340 | Turquoise | ZAT6, CZF2, C2H2                              | C2H2; nucleic acid binding / transcription factor/ zinc ion binding                                                                 | C2H2         |                |
| AT5G04940 | Turquoise | SUVH1                                         | SUVH1 (SU(VAR)3-9 HOMOLOG 1)                                                                                                        | SET          |                |
| AT5G07210 | Turquoise | ARR21                                         | ARR21 (ARABIDOPSIS RESPONSE REGULATOR 21); transcription factor/ two-component response regulator                                   | ARR-B        |                |

|           |           |                     |                                                                                                               |              |
|-----------|-----------|---------------------|---------------------------------------------------------------------------------------------------------------|--------------|
| AT5G07260 | Turquoise |                     | homeobox protein-related                                                                                      |              |
| AT5G07500 | Turquoise | PEI1                | PEI1; nucleic acid binding / transcription factor                                                             | C3H          |
| AT5G08070 | Turquoise | TCP17               | TCP17 (TCP domain protein 17); transcription factor                                                           | TCP          |
| AT5G08330 | Turquoise | TCP21               | TCP family transcription factor, putative                                                                     | TCP          |
| AT5G08520 | Turquoise |                     | myb family transcription factor                                                                               | MYB          |
| AT5G09250 | Turquoise | KIWI                | KIWI; DNA binding / transcription coactivator, unknown protein                                                |              |
| AT5G13790 | Turquoise | AGL15               | AGL15 (AGAMOUS-LIKE 15); DNA binding / transcription factor                                                   | MADS         |
| AT5G14260 | Turquoise |                     | SET domain-containing protein                                                                                 | SET          |
| AT5G14370 | Turquoise |                     | unknown protein                                                                                               | Orphans      |
| AT5G14540 | Turquoise |                     | proline-rich family protein                                                                                   |              |
| AT5G14750 | Turquoise | WER1, WER, AtMYB66  | WER (WEREWOLF 1); DNA binding / transcription factor                                                          | MYB          |
| AT5G15150 | Turquoise | ATHB3, HAT7, ATHB-3 | ATHB-3 (ARABIDOPSIS THALIANA HOMEODOMAIN 3); DNA binding / transcription factor                               | HB           |
| AT5G15210 | Turquoise | ATHB30, ZFHD3       | ATHB30/ZFHD3 (ZINC FINGER HOMEODOMAIN 3); DNA binding / transcription factor                                  | zf-HD        |
| AT5G15800 | Turquoise | 1-Sep, AGL2, SEP1   | SEP1 (SEPALATA1); DNA binding / transcription factor, unknown protein                                         | MADS         |
| AT5G15850 | Turquoise | COL1                | COL1 (CONSTANS-LIKE 1); transcription factor/ zinc ion binding                                                | C2C2-CO-like |
| AT5G16560 | Turquoise | KAN1, KAN           | KAN (KANADI); transcription factor                                                                            | G2-like      |
| AT5G16770 | Turquoise | ATMYB9              | ATMYB9 (myb domain protein 9); DNA binding, AtMYB9 (myb domain protein 9); DNA binding / transcription factor | MYB          |
| AT5G17300 | Turquoise |                     | myb family transcription factor                                                                               | MYB-related  |
| AT5G19310 | Turquoise |                     | homeotic gene regulator, putative                                                                             | SNF2         |
| AT5G19430 | Turquoise |                     | zinc finger (C3HC4-type RING finger) family protein                                                           |              |
| AT5G20420 | Turquoise | CHR42               | CHR42 (chromatin remodeling 42); ATP binding / DNA binding / helicase                                         | SNF2         |
| AT5G22220 | Turquoise | ATE2FB, E2F1        | E2F1; transcription factor                                                                                    |              |
| AT5G24590 | Turquoise | TIP, ANAC091        | TIP (TCV-INTERACTING PROTEIN); transcription factor                                                           |              |
| AT5G24930 | Turquoise | COL4                | zinc finger (B-box type) family protein                                                                       | C2C2-CO-like |
| AT5G25060 | Turquoise |                     | RNA recognition motif (RRM)-containing protein                                                                |              |
| AT5G25470 | Turquoise |                     | DNA binding                                                                                                   |              |
| AT5G26210 | Turquoise | AL4                 | PHD finger family protein                                                                                     | Alfin-like   |
| AT5G28040 | Turquoise |                     | transcription regulator                                                                                       | GeBP         |
| AT5G28300 | Turquoise |                     | trihelix DNA-binding protein, putative                                                                        | Trihelix     |
| AT5G38140 | Turquoise | NF-YC12             | histone-like transcription factor (CBF/NF-Y) family protein                                                   | CCAAT        |
| AT5G39860 | Turquoise | PRE1                | PRE1 (PACLOBUTRAZOL RESISTANCE1); DNA binding / transcription factor                                          |              |
| AT5G40340 | Turquoise |                     | PWWP domain-containing protein                                                                                |              |
| AT5G40360 | Turquoise | ATMYB115            | MYB115 (myb domain protein 115); DNA binding / transcription factor                                           | MYB          |
| AT5G41410 | Turquoise | BEL1                | BEL1 (BELL 1); DNA binding / transcription factor                                                             | HB           |
| AT5G41580 | Turquoise |                     | zinc ion binding                                                                                              |              |
| AT5G42200 | Turquoise |                     | zinc finger (C3HC4-type RING finger) family protein                                                           |              |
| AT5G42780 | Turquoise | ATHB27              | ATHB27 (ARABIDOPSIS THALIANA HOMEODOMAIN 27); DNA binding / transcription factor                              | zf-HD        |
| AT5G44190 | Turquoise | ATGLK2, GPRI2, GLK2 | GLK2 (GOLDEN2-LIKE 2); DNA binding / transcription factor                                                     | G2-like      |
| AT5G44210 | Turquoise | AtERF9, ATERF-9     | ATERF-9/ATERF9/ERF9 (ERF domain protein 9); DNA binding / transcription factor/ transcriptional repressor     | AP2-EREBP    |
| AT5G45980 | Turquoise | STPL, WOX8          | WOX8 (WUSCHEL-related homeobox 8); DNA binding / transcription factor                                         | HB           |
| AT5G46690 | Turquoise | bHLH071             | BHLH071 (BETA HLH PROTEIN 71); DNA binding / transcription factor                                             | bHLH         |
| AT5G46880 | Turquoise | HDG5, HB-7          | HB-7 (homeobox-7); DNA binding / transcription factor                                                         | HB           |
| AT5G46910 | Turquoise |                     | transcription factor jumonji (jmj) family protein                                                             | Jumonji      |
| AT5G47670 | Turquoise | NF-YB6, L1L         | CCAAT-box binding transcription factor family protein / leafy cotyledon 1-related (L1L)                       | CCAAT        |
| AT5G49330 | Turquoise | ATMYB111            | ATMYB111 (myb domain protein 111); DNA binding / transcription factor                                         | MYB          |
| AT5G50480 | Turquoise | NF-YC6              | CCAAT-box binding transcription factor Hap5a, putative                                                        | CCAAT        |
| AT5G51990 | Turquoise | CBF4, DREB1D        | CBF4/DREB1D (C- REPEAT-BINDING FACTOR 4); DNA binding / transcription factor/ transcriptional activator       | AP2-EREBP    |
| AT5G53200 | Turquoise | TRY                 | TRY (TRIPTYCHON); DNA binding / transcription factor                                                          | MYB-related  |
| AT5G53210 | Turquoise | SPCH, bHLH098       | DNA binding / transcription factor                                                                            | bHLH         |
| AT5G54470 | Turquoise |                     | zinc finger (B-box type) family protein                                                                       | Orphans      |
| AT5G54630 | Turquoise |                     | zinc finger protein-related                                                                                   |              |
| AT5G54680 | Turquoise | bHLH105, ILR3       | ILR3 (IAA-LEUCINE RESISTANT3); DNA binding / transcription factor                                             | bHLH         |
| AT5G55970 | Turquoise |                     | zinc finger (C3HC4-type RING finger) family protein                                                           |              |

|           |           |                                       |                                                                                                             |             |
|-----------|-----------|---------------------------------------|-------------------------------------------------------------------------------------------------------------|-------------|
| AT5G56780 | Turquoise |                                       | unknown protein                                                                                             | HRT         |
| AT5G56860 | Turquoise | GNC                                   | GNC (GATA, NITRATE-INDUCIBLE, CARBON METABOLISM-INVOLVED); transcription factor                             | C2C2-GATA   |
| AT5G57390 | Turquoise | CHO1, AIL5                            | AIL5 (AINTEGUMENTA-LIKE 5); DNA binding / transcription factor                                              | AP2-EREBP   |
| AT5G58280 | Turquoise |                                       | transcriptional factor B3 family protein                                                                    | ABI3VP1     |
| AT5G58340 | Turquoise |                                       | DNA binding                                                                                                 | MYB-related |
| AT5G59820 | Turquoise | ZAT12, RHL41                          | RHL41 (RESPONSIVE TO HIGH LIGHT 41); nucleic acid binding / transcription factor/ zinc ion binding          | C2H2        |
| AT5G60140 | Turquoise |                                       | transcriptional factor B3 family protein                                                                    | ABI3VP1     |
| AT5G61430 | Turquoise | ANAC100, ATNAC5                       | ANAC100/ATNAC5 (Arabidopsis NAC domain containing protein 100); transcription factor                        | NAC         |
| AT5G61600 | Turquoise |                                       | ethylene-responsive element-binding family protein                                                          | AP2-EREBP   |
| AT5G62010 | Turquoise |                                       |                                                                                                             |             |
| AT5G62020 | Turquoise | AT-HSFB2A                             | AT-HSFB2A (Arabidopsis thaliana heat shock transcription factor B2A); DNA binding / transcription factor    | HSF         |
| AT5G63260 | Turquoise |                                       | zinc finger (CCCH-type) family protein                                                                      | C3H         |
| AT5G63430 | Turquoise |                                       |                                                                                                             |             |
| AT5G63920 | Turquoise |                                       | DNA topoisomerase III alpha, putative                                                                       | Orphans     |
| AT5G64530 | Turquoise | ANAC104, XND1                         | ANAC104/XND1 (Arabidopsis NAC domain containing protein 104); transcription factor                          | NAC         |
| AT5G65230 | Turquoise | ATMYB53                               | ATMYB53 (myb domain protein 53); DNA binding / transcription factor                                         | MYB         |
| AT5G65410 | Turquoise | ATHB25, ZFHD2                         | ATHB25/ZFHD2 (ZINC FINGER HOMEODOMAIN 2); DNA binding / transcription factor                                | zf-HD       |
| AT5G65590 | Turquoise | AtDof5,7                              | Dof-type zinc finger domain-containing protein                                                              | C2C2-Dof    |
| AT5G66620 | Turquoise | DAR6                                  | LIM domain-containing protein                                                                               |             |
| AT5G66940 | Turquoise | AtDof5. 8                             | Dof-type zinc finger domain-containing protein                                                              | C2C2-Dof    |
| AT5G67030 | Turquoise | NPQ2, LOS6, IBS3, ATZEP, ATABA1, ABA1 | ABA1 (ABA DEFICIENT 1); zeaxanthin epoxidase                                                                | FHA         |
| AT1G01030 | Yellow    | NGA3                                  | NGA3 (NGATHA3); transcription factor                                                                        | ABI3VP1     |
| AT1G01780 | Yellow    |                                       | LIM domain-containing protein                                                                               | LIM         |
| AT1G05805 | Yellow    | bHLH128                               | basic helix-loop-helix (bHLH) family protein                                                                | bHLH        |
| AT1G06850 | Yellow    | ATBZIP52                              | DNA binding, bZIP transcription factor, putative                                                            | bZIP        |
| AT1G07530 | Yellow    | SCL14, ATGRAS2                        | scarecrow-like transcription factor 14 (SCL14)                                                              | GRAS        |
| AT1G07640 | Yellow    | OBP2, AtDof1. 1                       | OBP2 (OBF BINDING PROTEIN 2); DNA binding, OBP2 (OBF BINDING PROTEIN 2); DNA binding / transcription factor | C2C2-Dof    |
| AT1G08780 | Yellow    | PDF4, AIP3, ABI3, API3                | prefoldin, putative                                                                                         |             |
| AT1G09060 | Yellow    |                                       | transcription factor, transcription factor jumonji (jmnjC) domain-containing protein                        | Jumonji     |
| AT1G10200 | Yellow    | WLIM1, SF3                            | transcription factor LIM, putative                                                                          | LIM         |
| AT1G10320 | Yellow    |                                       | U2 snRNP auxiliary factor-related                                                                           | C3H         |
| AT1G10585 | Yellow    |                                       | transcription factor                                                                                        | bHLH        |
| AT1G13260 | Yellow    | RAV1                                  | RAV1 (Related to ABI3/VP1 1); DNA binding / transcription factor                                            | AP2-EREBP   |
| AT1G13300 | Yellow    |                                       | myb family transcription factor                                                                             | G2-like     |
| AT1G13600 | Yellow    | ATBZIP58                              | bZIP transcription factor family protein                                                                    | bZIP        |
| AT1G14350 | Yellow    | FLP, AtMYB124                         | FLP (FOUR LIPS), FLP (FOUR LIPS); DNA binding / transcription factor                                        | MYB         |
| AT1G16060 | Yellow    |                                       | ovule development protein, putative                                                                         | AP2-EREBP   |
| AT1G16530 | Yellow    | ASL9, LBD3                            | LOB domain protein 3 / lateral organ boundaries domain protein 3 (LBD3)                                     |             |
| AT1G17380 | Yellow    | TIFY11A, JAZ5                         | unknown protein                                                                                             |             |
| AT1G17590 | Yellow    | NF-YA8                                | CCAAT-binding transcription factor (CBF-B/NF-YA) family protein                                             | CCAAT       |
| AT1G19220 | Yellow    | IAA22, ARF11, ARF19                   | ARF19 (AUXIN RESPONSE FACTOR 11); transcription factor                                                      | ARF         |
| AT1G19270 | Yellow    | DA1                                   | ubiquitin interaction motif-containing protein / LIM domain-containing protein                              | Orphans     |
| AT1G20700 | Yellow    | ATWOX14, WOX14                        | homeobox-leucine zipper family protein                                                                      | HB          |
| AT1G20900 | Yellow    | ORE7, AHL27, ESC                      | ESC (ESCAROLA)                                                                                              |             |
| AT1G21200 | Yellow    |                                       | transcription factor                                                                                        |             |
| AT1G22070 | Yellow    | TGA3                                  | TGA3 (TGA1a-related gene 3); DNA binding / calmodulin binding / transcription factor                        | bZIP        |
| AT1G22640 | Yellow    | AtMYB3                                | MYB3 (myb domain protein 3); DNA binding / transcription factor                                             | MYB         |
| AT1G23370 | Yellow    |                                       |                                                                                                             |             |
| AT1G23380 | Yellow    | KNAT6S, KNAT6L, KNAT6                 | KNAT6 (Knotted-like Arabidopsis thaliana 6); DNA binding / transcription factor                             | HB          |
| AT1G24625 | Yellow    | ZFP7                                  | ZFP7 (ZINC FINGER PROTEIN 7); nucleic acid binding / transcription factor/ zinc ion binding                 | C2H2        |
| AT1G25550 | Yellow    | AT1G25550                             | myb family transcription factor                                                                             | G2-like     |
| AT1G26150 | Yellow    |                                       | protein kinase                                                                                              |             |
| AT1G27320 | Yellow    | AHK3                                  | AHK3 (ARABIDOPSIS HISTIDINE KINASE 3)                                                                       | Orphans     |
| AT1G28370 | Yellow    | AtERF11                               | ATERF11/ERF11 (ERF domain protein 11); DNA binding / transcription factor/ transcriptional repressor        | AP2-EREBP   |

|           |        |                        |                                                                                                                                                                                       |              |         |
|-----------|--------|------------------------|---------------------------------------------------------------------------------------------------------------------------------------------------------------------------------------|--------------|---------|
| AT1G29160 | Yellow | AtDof1.5               | Dof-type zinc finger domain-containing protein                                                                                                                                        | C2C2-Dof     |         |
| AT1G31050 | Yellow | bHLH111                | transcription factor                                                                                                                                                                  |              |         |
| AT1G32700 | Yellow |                        | zinc-binding family protein                                                                                                                                                           | PLATZ        |         |
| AT1G33480 | Yellow |                        | protein binding / zinc ion binding                                                                                                                                                    |              |         |
| AT1G34670 | Yellow | ATMYB93                | ATMYB93 (myb domain protein 93); DNA binding / transcription factor                                                                                                                   | MYB          |         |
| AT1G43160 | Yellow | RAP2.6, RAP2.06        | RAP2.6 (related to AP2 6); DNA binding / transcription factor                                                                                                                         | AP2-EREBP    |         |
| AT1G47655 | Yellow |                        | Dof-type zinc finger domain-containing protein                                                                                                                                        | C2C2-Dof     |         |
| AT1G51070 | Yellow | bHLH115                | basic helix-loop-helix (bHLH) family protein                                                                                                                                          | bHLH         |         |
| AT1G56010 | Yellow | NAC1, ANAC021, ANAC022 | NAC1 (Arabidopsis NAC domain containing protein 21, Arabidopsis NAC domain containing protein 22); transcription factor                                                               | NAC          | miR164, |
| AT1G58110 | Yellow |                        | DNA binding / transcription factor, bZIP family transcription factor                                                                                                                  |              |         |
| AT1G58220 | Yellow |                        | myb family transcription factor                                                                                                                                                       | MYB-related  |         |
| AT1G61660 | Yellow | bHLH112                | basic helix-loop-helix (bHLH) family protein                                                                                                                                          | bHLH         |         |
| AT1G64530 | Yellow | NLP6                   | RWP-RK domain-containing protein                                                                                                                                                      | RWP-RK       |         |
| AT1G65910 | Yellow | ANAC028                | ANAC028 (Arabidopsis NAC domain containing protein 28); transcription factor                                                                                                          | NAC          |         |
| AT1G66140 | Yellow | ZFP4                   | ZFP4 (ZINC FINGER PROTEIN 4); nucleic acid binding / transcription factor/ zinc ion binding                                                                                           | C2H2         |         |
| AT1G67030 | Yellow | ZFP6                   | ZFP6 (ZINC FINGER PROTEIN 6); nucleic acid binding / transcription factor/ zinc ion binding                                                                                           |              |         |
| AT1G67310 | Yellow |                        | calmodulin binding / transcription regulator                                                                                                                                          | CAMTA        |         |
| AT1G67710 | Yellow | ARR11                  | ARR11 (RESPONSE REGULATOR 11); transcription factor/ two-component response regulator                                                                                                 | ARR-B        |         |
| AT1G67910 | Yellow |                        | unknown protein                                                                                                                                                                       |              |         |
| AT1G68130 | Yellow | ATIDD14                | ATIDD14 (ARABIDOPSIS THALIANA INDETERMINATE(ID)-DOMAIN 14), ATIDD14 (ARABIDOPSIS THALIANA INDETERMINATE(ID)-DOMAIN 14); nucleic acid binding / transcription factor/ zinc ion binding | C2H2         |         |
| AT1G68520 | Yellow | COL6                   | zinc finger (B-box type) family protein                                                                                                                                               | C2C2-CO-like |         |
| AT1G68670 | Yellow |                        | myb family transcription factor                                                                                                                                                       | G2-like      |         |
| AT1G68810 | Yellow | bHLH030                | basic helix-loop-helix (bHLH) family protein                                                                                                                                          | bHLH         |         |
| AT1G68840 | Yellow | RAV2, RAP2.8, TEM2     | RAV2 (REGULATOR OF THE ATPASE OF THE VACUOLAR MEMBRANE); DNA binding / transcription factor                                                                                           | AP2-EREBP    |         |
| AT1G68880 | Yellow | ATBZIP                 | bZIP transcription factor family protein                                                                                                                                              | bZIP         |         |
| AT1G69010 | Yellow | bHLH102, BIM2          | BIM2 (BES1-INTERACTING MYC-LIKE PROTEIN 2); DNA binding / transcription factor                                                                                                        | bHLH         |         |
| AT1G69490 | Yellow | NAP, ANAC029, ATNAP    | NAP (NAC-LIKE, ACTIVATED BY AP3/P1); transcription factor                                                                                                                             | NAC          |         |
| AT1G69580 | Yellow |                        | transcription factor, unknown protein                                                                                                                                                 | G2-like      |         |
| AT1G69780 | Yellow | ATHB13                 | ATHB13 (ARABIDOPSIS THALIANA HOMEBOX PROTEIN 12); DNA binding / transcription factor                                                                                                  | HB           |         |
| AT1G70930 | Yellow |                        |                                                                                                                                                                                       |              |         |
| AT1G71930 | Yellow | VND7, ANAC030          | VND7 (VASCULAR RELATED NAC-DOMAIN PROTEIN 7); transcription factor                                                                                                                    | NAC          |         |
| AT1G72360 | Yellow |                        | ethylene-responsive element-binding protein, putative, unknown protein                                                                                                                | AP2-EREBP    |         |
| AT1G72450 | Yellow | TIFY11B, JAZ6          | unknown protein                                                                                                                                                                       | ZIM          |         |
| AT1G73830 | Yellow | bHLH050, BEE3          | BEE3 (BR ENHANCED EXPRESSION 3); DNA binding / transcription factor                                                                                                                   | bHLH         |         |
| AT1G74430 | Yellow | ATMYB95, AtMYBCP66     | MYB95 (myb domain protein 95); DNA binding / transcription factor                                                                                                                     | MYB          |         |
| AT1G74840 | Yellow |                        | myb family transcription factor                                                                                                                                                       | MYB-related  |         |
| AT1G75080 | Yellow | BZR1                   | BZR1 (BRASSINAZOLE-RESISTANT 1), BZR1 (BRASSINAZOLE-RESISTANT 1); transcription regulator                                                                                             | BES1         |         |
| AT1G75410 | Yellow | BLH3                   | BLH3 (BLH3), BLH3 (BLH3); DNA binding / transcription factor                                                                                                                          | HB           |         |
| AT1G76410 | Yellow | ATL8                   | ATL8; protein binding / zinc ion binding                                                                                                                                              |              |         |
| AT1G76890 | Yellow | AT-GT2, GT2            | GT2 (GT2); transcription factor                                                                                                                                                       | Trihelix     |         |
| AT1G77080 | Yellow | FLM, AGL27, MAF1       | MAF1 (MADS AFFECTING FLOWERING 1); transcription factor                                                                                                                               |              |         |
| AT1G77250 | Yellow |                        | PHD finger family protein                                                                                                                                                             | PHD          |         |
| AT1G77850 | Yellow | ARF17                  | ARF17 (AUXIN RESPONSE FACTOR 17); transcription factor                                                                                                                                | ARF          | miR160, |
| AT1G78700 | Yellow |                        | brassinosteroid signalling positive regulator-related                                                                                                                                 | BES1         |         |
| AT1G79180 | Yellow | ATMYB63                | ATMYB63 (myb domain protein 63); DNA binding / transcription factor                                                                                                                   | MYB          |         |
| AT1G79430 | Yellow | WDY, APL               | APL (ALTERED PHLOEM DEVELOPMENT); transcription factor                                                                                                                                |              |         |
| AT2G01760 | Yellow | ARR14                  | ARR14 (ARABIDOPSIS RESPONSE REGULATOR 14); transcription factor/ two-component response regulator                                                                                     | ARR-B        |         |
| AT2G01830 | Yellow | CRE1, AHK4, WOL1, WOL  | WOL (CYTOKININ RESPONSE 1)                                                                                                                                                            | Orphans      |         |
| AT2G03060 | Yellow | AGL30                  | DNA binding / transcription factor, unknown protein                                                                                                                                   | MADS         |         |
| AT2G03500 | Yellow |                        | myb family transcription factor                                                                                                                                                       | G2-like      |         |
| AT2G04038 | Yellow | ATBZIP48               | bZIP transcription factor family protein                                                                                                                                              | bZIP         |         |

|           |        |                              |                                                                                                                         |             |                |
|-----------|--------|------------------------------|-------------------------------------------------------------------------------------------------------------------------|-------------|----------------|
| AT2G16400 | Yellow | BLH7                         | BLH7 (BELL1-LIKE HOMEODOMAIN 7); DNA binding / transcription factor                                                     | HB          |                |
| AT2G16720 | Yellow | AtY49, AtMYB7                | MYB7 (myb domain protein 7); DNA binding / transcription factor                                                         | MYB         |                |
| AT2G17040 | Yellow | ANAC036                      | ANAC036 (Arabidopsis NAC domain containing protein 36); transcription factor                                            | NAC         |                |
| AT2G17820 | Yellow | AHK1, ATHK1                  | ATHK1 (HISTIDINE KINASE 1)                                                                                              | Orphans     |                |
| AT2G17900 | Yellow | SDG37                        | SDG37 (SET DOMAIN GROUP 37); zinc ion binding                                                                           |             |                |
| AT2G18160 | Yellow | GBF5, ATBZIP2                | GBF5 (G-box binding factor 5); DNA binding / transcription factor                                                       | bZIP        |                |
| AT2G18280 | Yellow | AtTLP2                       | AtTLP2 (TUBBY LIKE PROTEIN 2); phosphoric diester hydrolase/ transcription factor                                       | TUB         |                |
| AT2G18300 | Yellow | bHLH064                      | basic helix-loop-helix (bHLH) family protein                                                                            | bHLH        |                |
| AT2G18380 | Yellow | HANL1                        | zinc finger (GATA type) family protein                                                                                  | C2C2-GATA   |                |
| AT2G18550 | Yellow | HB-2, ATHB21                 | ATHB21/HB-2 (homeobox-2); DNA binding / transcription factor                                                            | HB          |                |
| AT2G22120 | Yellow |                              | protein binding / zinc ion binding                                                                                      |             |                |
| AT2G22540 | Yellow | AGL22, SVP                   | SVP (SHORT VEGETATIVE PHASE); transcription factor                                                                      | MADS        |                |
| AT2G22750 | Yellow | bHLH018                      | basic helix-loop-helix (bHLH) family protein                                                                            | bHLH        |                |
| AT2G22850 | Yellow | ATBZIP6                      | bZIP transcription factor family protein                                                                                | bZIP        |                |
| AT2G23380 | Yellow | SET1, SDG1, ICU1, CLF        | CLF (CURLY LEAF); transcription factor                                                                                  | SET         |                |
| AT2G24260 | Yellow | bHLH066                      | basic helix-loop-helix (bHLH) family protein                                                                            | bHLH        |                |
| AT2G24300 | Yellow |                              | calmodulin-binding protein                                                                                              |             |                |
| AT2G24830 | Yellow |                              | zinc finger (CCCH-type) family protein / D111/G-patch domain-containing protein                                         | C3H         |                |
| AT2G25170 | Yellow | SSL2, GYM, CHD3, PKL, CHR6   | PKL/SSL2 (PICKLE, SUPPRESSOR OF SLR2)                                                                                   | PHD         |                |
| AT2G28200 | Yellow |                              | nucleic acid binding / transcription factor/ zinc ion binding                                                           | C2H2        |                |
| AT2G28550 | Yellow | TOE1, RAP2.7                 | TOE1 (TARGET OF EAT1 1); DNA binding / transcription factor                                                             | AP2-EREBP   | miR172,        |
| AT2G28810 | Yellow | AtDof2.2                     | Dof-type zinc finger domain-containing protein                                                                          | C2C2-Dof    |                |
| AT2G29660 | Yellow |                              | zinc finger (C2H2 type) family protein                                                                                  | C2H2        |                |
| AT2G31380 | Yellow | STH                          | STH (salt tolerance homologue); transcription factor/ zinc ion binding                                                  | Orphans     |                |
| AT2G33290 | Yellow | SDG3, ATSUVH2, SUVH2         | SUVH2 (SU(VAR)3-9 HOMOLOG 2)                                                                                            | SET         |                |
| AT2G33860 | Yellow | ARF3, ETT                    | ETT (ETTIN); transcription factor                                                                                       | ARF         |                |
| AT2G34210 | Yellow |                              | KOW domain-containing transcription factor family protein                                                               |             |                |
| AT2G34600 | Yellow | TIFY5B, JAZ7                 | unknown protein                                                                                                         | ZIM         |                |
| AT2G34830 | Yellow | ATWRKY35, WRKY35, MEE24      | WRKY35 (WRKY DNA-binding protein 35, maternal effect embryo arrest 24); transcription factor                            | WRKY        |                |
| AT2G35000 | Yellow |                              | zinc finger (C3HC4-type RING finger) family protein                                                                     |             |                |
| AT2G35270 | Yellow |                              | DNA-binding protein-related                                                                                             |             |                |
| AT2G35940 | Yellow | BLH1, EDA29                  | BLH1 (BLH1), BLH1 (BLH1); DNA binding / transcription factor, BLH1 (BLH1); transcription factor                         | HB          |                |
| AT2G36080 | Yellow |                              | DNA-binding protein, putative                                                                                           | ABI3VP1     |                |
| AT2G36890 | Yellow | BIT1, ATMYB38, RAX2          | ATMYB38/MYB38/RAX2 (myb domain protein 38); DNA binding / transcription factor                                          | MYB         |                |
| AT2G39830 | Yellow | DAR2                         | zinc ion binding                                                                                                        | Orphans     |                |
| AT2G39900 | Yellow |                              | LIM domain-containing protein                                                                                           | LIM         |                |
| AT2G40200 | Yellow | bHLH051                      | basic helix-loop-helix (bHLH) family protein                                                                            | bHLH        |                |
| AT2G40970 | Yellow |                              | myb family transcription factor                                                                                         | G2-like     |                |
| AT2G43140 | Yellow | bHLH129                      | DNA binding / transcription factor                                                                                      | bHLH        |                |
| AT2G44940 | Yellow |                              | AP2 domain-containing transcription factor TINY, putative                                                               | AP2-EREBP   |                |
| AT2G45050 | Yellow |                              | zinc finger (GATA type) family protein                                                                                  | C2C2-GATA   |                |
| AT2G45160 | Yellow |                              | scarecrow transcription factor family protein                                                                           | GRAS        | miR170/miR171, |
| AT2G45430 | Yellow |                              | DNA-binding protein-related                                                                                             |             |                |
| AT2G45660 | Yellow | SOC1, AGL20                  | AGL20 (AGAMOUS-LIKE 20); transcription factor                                                                           | MADS        |                |
| AT2G46410 | Yellow | CPC                          | CPC (CAPRICE); DNA binding / transcription factor                                                                       | MYB-related |                |
| AT2G46590 | Yellow | DAG2, AtDof2,5               | DAG2 (DOF AFFECTING GERMINATION 2); DNA binding, DAG2 (DOF AFFECTING GERMINATION 2); DNA binding / transcription factor | C2C2-Dof    |                |
| AT3G01220 | Yellow | ATHB20                       | ATHB20 (ARABIDOPSIS THALIANA HOMEBOX PROTEIN 20); DNA binding / transcription factor                                    | HB          |                |
| AT3G02340 | Yellow |                              | zinc finger (C3HC4-type RING finger) family protein                                                                     |             |                |
| AT3G02830 | Yellow | ZFN1                         | ZFN1 (ZINC FINGER PROTEIN 1); nucleic acid binding                                                                      | C3H         |                |
| AT3G02860 | Yellow |                              | unknown protein                                                                                                         |             |                |
| AT3G04030 | Yellow |                              | myb family transcription factor, unknown protein                                                                        | G2-like     |                |
| AT3G04070 | Yellow | ANAC047                      | ANAC047 (Arabidopsis NAC domain containing protein 47); transcription factor, unknown protein                           | NAC         |                |
| AT3G05690 | Yellow | NF-YA2, ATHAP2B, HAP2B, UNE8 | HAP2B (Heme activator protein (yeast) homolog 2B, unfertilized embryo sac 8); transcription factor                      | CCAAT       | miR169,        |
| AT3G05800 | Yellow | bHLH150                      | transcription factor                                                                                                    |             |                |

|           |        |                                    |                                                                                                                                                    |             |
|-----------|--------|------------------------------------|----------------------------------------------------------------------------------------------------------------------------------------------------|-------------|
| AT3G06380 | Yellow | ATTLP9                             | ATTLP9/AtTLP9 (TUBBY LIKE PROTEIN 9, TUBBY-LIKE PROTEIN 9); phosphoric diester hydrolase/ protein binding / transcription factor                   | TUB         |
| AT3G06590 | Yellow | bHLH148                            | transcription factor, unknown protein                                                                                                              |             |
| AT3G07340 | Yellow | bHLH062                            | basic helix-loop-helix (bHLH) family protein                                                                                                       | bHLH        |
| AT3G07670 | Yellow |                                    | SET domain-containing protein                                                                                                                      | SET         |
| AT3G07740 | Yellow | HXA2, HXA02, HAC10, ATADA2A, ADA2A | ADA2A (Arabidopsis adaptor 2A homolog), ADA2A (Arabidopsis adaptor 2A homolog); DNA binding / transcription factor                                 | MYB-related |
| AT3G11090 | Yellow | LBD21                              | LOB domain family protein / lateral organ boundaries domain family protein (LBD21)                                                                 |             |
| AT3G11280 | Yellow |                                    | myb family transcription factor                                                                                                                    | MYB         |
| AT3G11450 | Yellow |                                    | DNAJ heat shock N-terminal domain-containing protein / cell division protein-related                                                               | MYB         |
| AT3G12680 | Yellow | HUA1                               | HUA1 (ENHANCER OF AG-4 1)                                                                                                                          | C3H         |
| AT3G12980 | Yellow | HAC5 ,ATHPCAT4                     | histone acetyltransferase 5 (HAC5)                                                                                                                 | TAZ         |
| AT3G13040 | Yellow |                                    | myb family transcription factor                                                                                                                    | G2-like     |
| AT3G16350 | Yellow |                                    | myb family transcription factor                                                                                                                    | MYB-related |
| AT3G16500 | Yellow | IAA26, PAPI                        | PAP1 (PHYTOCHROME-ASSOCIATED PROTEIN 1); transcription factor                                                                                      | AUX/IAA     |
| AT3G17100 | Yellow | bHLH147                            | transcription factor                                                                                                                               |             |
| AT3G17730 | Yellow | ANAC057                            | ANAC057 (Arabidopsis NAC domain containing protein 57); transcription factor                                                                       | NAC         |
| AT3G17860 | Yellow | TIFY6B, JAI3, JAZ3                 | unknown protein                                                                                                                                    | ZIM         |
| AT3G23210 | Yellow | bHLH034                            | basic helix-loop-helix (bHLH) family protein                                                                                                       | bHLH        |
| AT3G23240 | Yellow | ERF1, ATERF1                       | ATERF1/ERF1 (ETHYLENE RESPONSE FACTOR 1); DNA binding / transcription factor/ transcriptional activator                                            | AP2-EREBP   |
| AT3G24010 | Yellow | ATING1                             | PHD finger family protein                                                                                                                          | PHD         |
| AT3G24310 | Yellow | MYB305, ATMYB71                    | MYB305 (myb domain protein 305); DNA binding / transcription factor                                                                                | MYB         |
| AT3G25710 | Yellow | BHLH32, bHLH032                    | basic helix-loop-helix (bHLH) family protein                                                                                                       | bHLH        |
| AT3G27650 | Yellow | LBD25                              | LOB domain protein 25 / lateral organ boundaries domain protein 25 (LBD25)                                                                         |             |
| AT3G29035 | Yellow | AtNAC3, ANAC059                    | ANAC059/ATNAC3 (Arabidopsis NAC domain containing protein 59); protein heterodimerization/ transcription factor                                    | NAC         |
| AT3G43430 | Yellow |                                    | zinc finger (C3HC4-type RING finger) family protein                                                                                                |             |
| AT3G46130 | Yellow | PF3, ATMYB111 ATMYB48              | MYB111 (myb domain protein 111), MYB111 (myb domain protein 111); DNA binding, MYB111 (myb domain protein 111); DNA binding / transcription factor | MYB         |
| AT3G46590 | Yellow | ATTRP2, TRFL1                      | TRFL1 (TRF-LIKE 1); DNA binding                                                                                                                    |             |
| AT3G47500 | Yellow | CDF3, AtDoF3,3                     | CDF3 (CYCLING DOF FACTOR 3); DNA binding / protein binding / transcription factor                                                                  | C2C2-Dof    |
| AT3G47620 | Yellow | AtTCP14, TCP14                     | TCP family transcription factor, putative                                                                                                          | TCP         |
| AT3G48920 | Yellow | ATMYB45                            | AtMYB45 (myb domain protein 45); DNA binding / transcription factor                                                                                | MYB         |
| AT3G49690 | Yellow | ATMYB84, RAX3                      | ATMYB84/MYB84/RAX3 (myb domain protein 84); DNA binding / transcription factor                                                                     | MYB         |
| AT3G49760 | Yellow | ATBZIP5                            | bZIP transcription factor family protein                                                                                                           | bZIP        |
| AT3G49940 | Yellow | LBD38                              | LOB domain protein 38 / lateral organ boundaries domain protein 38 (LBD38)                                                                         |             |
| AT3G51910 | Yellow | AT-HSFA7A                          | AT-HSFA7A (Arabidopsis thaliana heat shock transcription factor A7A); DNA binding / transcription factor                                           | HSF         |
| AT3G52100 | Yellow |                                    | PHD finger family protein                                                                                                                          |             |
| AT3G53200 | Yellow | ATMYB27                            | AtMYB27 (myb domain protein 27); DNA binding / transcription factor                                                                                | MYB         |
| AT3G53340 | Yellow | NF-YB10                            | CCAAT-box binding transcription factor, putative                                                                                                   | CCAAT       |
| AT3G54430 | Yellow | SRS6                               | SRS6 (SHI-RELATED SEQUENCE 6)                                                                                                                      | SRS         |
| AT3G57040 | Yellow | ARR4, ARR9                         | ARR9 (RESPONSE REACTOR 4); transcription regulator                                                                                                 | Orphans     |
| AT3G57230 | Yellow | AGL16                              | AGL16 (AGAMOUS-LIKE 16), AGL16 (AGAMOUS-LIKE 16); transcription factor                                                                             | MADS        |
| AT3G59060 | Yellow | PIF5, PIL6                         | PIL6 (PHYTOCHROME-INTERACTING FACTOR 5); DNA binding / transcription factor                                                                        | bHLH        |
| AT3G60080 | Yellow |                                    | zinc finger (C3HC4-type RING finger) family protein                                                                                                |             |
| AT3G60490 | Yellow |                                    | AP2 domain-containing transcription factor TINY, putative                                                                                          | AP2-EREBP   |
| AT3G60530 | Yellow |                                    | zinc finger (GATA type) family protein                                                                                                             | C2C2-GATA   |
| AT3G60630 | Yellow |                                    | scarecrow transcription factor family protein                                                                                                      | GRAS        |
| AT4G00050 | Yellow | bHLH016, UNE10                     | UNE10 (unfertilized embryo sac 10); DNA binding / transcription factor                                                                             | bHLH        |
| AT4G00150 | Yellow | SCL6                               | scarecrow-like transcription factor 6 (SCL6)                                                                                                       | GRAS        |
| AT4G00990 | Yellow |                                    | transcription factor jumonji (jmjC) domain-containing protein                                                                                      | Jumonji     |
| AT4G02020 | Yellow | SDG10, SWINGER, SWN, EZA1          | EZA1 (SWINGER); transcription factor                                                                                                               | SET         |
| AT4G02590 | Yellow | bHLH059, UNE12                     | UNE12 (unfertilized embryo sac 12); DNA binding, UNE12 (unfertilized embryo sac 12); DNA binding / transcription factor, unknown protein           | bHLH        |

miR824,

miR170/miR171,

miR170/miR171,

|           |        |                                     |                                                                                                                                                                                                |           |                |
|-----------|--------|-------------------------------------|------------------------------------------------------------------------------------------------------------------------------------------------------------------------------------------------|-----------|----------------|
| AT4G02640 | Yellow | BZO2H1, AT4G02640, ATBZIP10         | BZO2H1 (basic leucine zipper O2 homolog 1); DNA binding / sequence-specific DNA binding / transcription factor, BZO2H1 (basic leucine zipper O2 homolog 1); DNA binding / transcription factor | bZIP      |                |
| AT4G02670 | Yellow | ATIDD12                             | ATIDD12 (ARABIDOPSIS THALIANA INDETERMINATE(ID)-DOMAIN 12); nucleic acid binding / transcription factor/ zinc ion binding                                                                      | C2H2      |                |
| AT4G05170 | Yellow | bHLH114                             | DNA binding / transcription factor                                                                                                                                                             | bHLH      |                |
| AT4G11880 | Yellow | AGL14                               | AGL14 (AGAMOUS-LIKE 14); DNA binding / transcription factor                                                                                                                                    | MADS      |                |
| AT4G12080 | Yellow |                                     | DNA-binding family protein                                                                                                                                                                     |           |                |
| AT4G13100 | Yellow |                                     | zinc finger (C3HC4-type RING finger) family protein                                                                                                                                            |           |                |
| AT4G13640 | Yellow | UNE16                               | UNE16 (unfertilized embryo sac 16), UNE16 (unfertilized embryo sac 16); transcription factor                                                                                                   | G2-like   |                |
| AT4G13980 | Yellow | AT-HSFA5                            | AT-HSFA5 (Arabidopsis thaliana heat shock transcription factor A5); DNA binding / transcription factor                                                                                         | HSF       |                |
| AT4G14410 | Yellow | bHLH104                             | basic helix-loop-helix (bHLH) family protein                                                                                                                                                   | bHLH      |                |
| AT4G14920 | Yellow |                                     | PHD finger transcription factor, putative                                                                                                                                                      | PHD       |                |
| AT4G16750 | Yellow |                                     | DRE-binding transcription factor, putative                                                                                                                                                     | AP2-EREBP |                |
| AT4G16780 | Yellow | ATHB2, HAT4, ATHB-2                 | ATHB-2 (Homeobox-leucine zipper protein HAT4); DNA binding / transcription factor                                                                                                              | HB        |                |
| AT4G16870 | Yellow |                                     | transposable element gene                                                                                                                                                                      |           |                |
| AT4G17500 | Yellow | ATERF-1                             | ATERF-1 (ETHYLENE RESPONSIVE ELEMENT BINDING FACTOR 1); DNA binding / transcription factor/ transcriptional activator                                                                          | AP2-EREBP |                |
| AT4G17800 | Yellow |                                     | DNA-binding protein-related                                                                                                                                                                    |           |                |
| AT4G17880 | Yellow | bHLH004                             | basic helix-loop-helix (bHLH) family protein                                                                                                                                                   | bHLH      |                |
| AT4G18170 | Yellow | ATWRKY28, WRKY28                    | WRKY28 (WRKY DNA-binding protein 28); transcription factor                                                                                                                                     | WRKY      |                |
| AT4G24020 | Yellow | NLP7                                | RWP-RK domain-containing protein                                                                                                                                                               | RWP-RK    |                |
| AT4G24240 | Yellow | ATWRKY7, WRKY7                      | WRKY7 (WRKY DNA-binding protein 7); transcription factor                                                                                                                                       | WRKY      |                |
| AT4G24540 | Yellow | AGL24                               | AGL24 (AGAMOUS-LIKE 24); transcription factor                                                                                                                                                  | MADS      |                |
| AT4G26640 | Yellow | ATWRKY20, WRKY20                    | WRKY20 (WRKY DNA-binding protein 20); transcription factor                                                                                                                                     | WRKY      |                |
| AT4G27910 | Yellow | SDG16, ATX4                         | PHD finger protein-related / SET domain-containing protein (TX4)                                                                                                                               | PHD       |                |
| AT4G28270 | Yellow |                                     | zinc finger (C3HC4-type RING finger) family protein                                                                                                                                            |           |                |
| AT4G28890 | Yellow |                                     | zinc finger (C3HC4-type RING finger) family protein                                                                                                                                            |           |                |
| AT4G29080 | Yellow | IAA27, PAP2                         | PAP2 (PHYTOCHROME-ASSOCIATED PROTEIN 2); transcription factor                                                                                                                                  | AUX/IAA   |                |
| AT4G29100 | Yellow | bHLH068                             | ethylene-responsive family protein                                                                                                                                                             |           |                |
| AT4G35270 | Yellow | NLP2                                | RWP-RK domain-containing protein                                                                                                                                                               | RWP-RK    |                |
| AT4G36050 | Yellow |                                     | endonuclease/exonuclease/phosphatase family protein                                                                                                                                            | Orphans   |                |
| AT4G36160 | Yellow | ANAC076, VND2                       | ANAC076/VND2 (Arabidopsis NAC domain containing protein 76, VASCULAR-RELATED NAC-DOMAIN 2); transcription factor                                                                               | NAC       |                |
| AT4G36540 | Yellow | bHLH058, BEE2                       | BEE2 (BR ENHANCED EXPRESSION 2); DNA binding / transcription factor                                                                                                                            | bHLH      |                |
| AT4G36620 | Yellow | HANL2                               | zinc finger (GATA type) family protein                                                                                                                                                         | C2C2-GATA |                |
| AT4G36710 | Yellow |                                     | scarecrow transcription factor family protein                                                                                                                                                  | GRAS      |                |
| AT4G36990 | Yellow | AT-HSFB1, ATHSF4, HSF4, HSFB1       | HSF4 (HEAT SHOCK FACTOR 4); DNA binding / transcription factor                                                                                                                                 | HSF       |                |
| AT4G37110 | Yellow |                                     | protein binding / zinc ion binding                                                                                                                                                             |           |                |
| AT4G37610 | Yellow | BT5                                 | BT5 (BTB and TAZ domain protein 5); protein binding / transcription regulator                                                                                                                  | TAZ       |                |
| AT4G38620 | Yellow | AtMYB4                              | MYB4 (myb domain protein 4); transcription factor                                                                                                                                              | MYB       |                |
| AT4G39410 | Yellow | ATWRKY13, WRKY13                    | WRKY13 (WRKY DNA-binding protein 13); transcription factor                                                                                                                                     | WRKY      |                |
| AT4G40060 | Yellow | ATHB16 ,ATHB-16                     | ATHB16 (ARABIDOPSIS THALIANA HOMEBOX PROTEIN 16); transcription factor                                                                                                                         | HB        |                |
| AT5G02030 | Yellow | PNY, BLR, BLH9, RPL, HB-6, VAN, LSN | LSN (LARSON, VAAMANA); DNA binding / transcription factor                                                                                                                                      | HB        |                |
| AT5G03510 | Yellow |                                     | zinc finger (C2H2 type) family protein                                                                                                                                                         | C2H2      |                |
| AT5G03680 | Yellow | PTL                                 | PTL (PETAL LOSS); transcription factor                                                                                                                                                         | Trihelix  |                |
| AT5G05790 | Yellow |                                     | myb family transcription factor                                                                                                                                                                | MYB       |                |
| AT5G06100 | Yellow | ATMYB33                             | ATMYB33/MYB33 (myb domain protein 33), ATMYB33/MYB33 (myb domain protein 33); DNA binding / transcription factor                                                                               | MYB       | miR159/miR319, |
| AT5G06510 | Yellow | NF-YA10                             | CCAAT-binding transcription factor (CBF-B/NF-YA) family protein                                                                                                                                | CCAAT     | miR169,        |
| AT5G06710 | Yellow | HAT14                               | HAT14 (homeobox-leucine zipper protein 14); DNA binding, HAT14 (homeobox-leucine zipper protein 14); DNA binding / transcription factor                                                        | HB        |                |
| AT5G06800 | Yellow |                                     | myb family transcription factor                                                                                                                                                                | G2-like   |                |
| AT5G07100 | Yellow | WRKY26                              | WRKY26 (WRKY DNA-binding protein 26); transcription factor                                                                                                                                     | WRKY      |                |
| AT5G07580 | Yellow |                                     | DNA binding / transcription factor                                                                                                                                                             | AP2-EREBP |                |
| AT5G09460 | Yellow | bHLH143                             | transcription factor/ transcription regulator                                                                                                                                                  |           |                |



|           |        |                               |                                                                                                                                                    |              |
|-----------|--------|-------------------------------|----------------------------------------------------------------------------------------------------------------------------------------------------|--------------|
| AT5G10030 | Yellow | OBF4, TGA4                    | TGA4 (TGACG MOTIF-BINDING FACTOR 4); DNA binding / calmodulin binding / transcription factor                                                       | bZIP         |
| AT5G10970 | Yellow |                               | zinc finger (C2H2 type) family protein                                                                                                             | C2H2         |
| AT5G11060 | Yellow | KNAT4                         | KNAT4 (KNOTTED1-LIKE HOMEODOMAIN GENE 4); transcription factor                                                                                     | HB           |
| AT5G11260 | Yellow | TED5, HY5                     | HY5 (ELONGATED HYPOCOTYL 5); DNA binding / transcription factor                                                                                    | bZIP         |
| AT5G12440 | Yellow |                               | zinc finger (CCCH-type) family protein                                                                                                             | C3H          |
| AT5G12850 | Yellow | PEI1                          | zinc finger (CCCH-type) family protein                                                                                                             | C3H          |
| AT5G13180 | Yellow | VNDIP2, ANAC083, VNI2         | ANAC083 (Arabidopsis NAC domain containing protein 83); transcription factor                                                                       | NAC          |
| AT5G13220 | Yellow | JAS1, AT5G13220, TIFY9, JAZ10 | unknown protein                                                                                                                                    | ZIM          |
| AT5G13910 | Yellow | LEAFY PETIOLE (LEP)           | LEP (LEAFY PETIOLE); DNA binding / transcription factor                                                                                            | AP2-EREBP    |
| AT5G15790 | Yellow |                               | zinc finger (C3HC4-type RING finger) family protein                                                                                                |              |
| AT5G15830 | Yellow | ATBZIP3                       | bZIP transcription factor family protein                                                                                                           | bZIP         |
| AT5G16600 | Yellow | ATMYB43                       | MYB43 (myb domain protein 43); DNA binding / transcription factor                                                                                  | MYB          |
| AT5G17890 | Yellow | DAR4                          | LIM domain-containing protein / disease resistance protein-related                                                                                 | Orphans      |
| AT5G18240 | Yellow | MYR1                          | MYR1 (MYB-RELATED PROTEIN 1), MYR1 (MYB-RELATED PROTEIN 1); transcription factor                                                                   | G2-like      |
| AT5G18680 | Yellow | AtTLP11                       | AtTLP11 (TUBBY LIKE PROTEIN 11); phosphoric diester hydrolase/ transcription factor                                                                | TUB          |
| AT5G20220 | Yellow |                               | zinc knuckle (CCHC-type) family protein                                                                                                            |              |
| AT5G20240 | Yellow | PI                            | PI (PISTILLATA); DNA binding / transcription factor                                                                                                | MADS         |
| AT5G20885 | Yellow |                               | zinc finger (C3HC4-type RING finger) family protein                                                                                                |              |
| AT5G20900 | Yellow | TIFY3B, JAZ12                 | unknown protein                                                                                                                                    | ZIM          |
| AT5G22890 | Yellow |                               | zinc finger (C2H2 type) family protein                                                                                                             | C2H2         |
| AT5G23000 | Yellow | ATMYB37, RAX1                 | ATMYB37/MYB37/RAX1 (myb domain protein 37); DNA binding / transcription factor                                                                     | MYB          |
| AT5G25160 | Yellow | ZFP3                          | ZFP3 (ZINC FINGER PROTEIN 3); nucleic acid binding / transcription factor/ zinc ion binding                                                        | C2H2         |
| AT5G25810 | Yellow | TNY, TINY                     | TNY (TINY); DNA binding / transcription factor                                                                                                     | AP2-EREBP    |
| AT5G25890 | Yellow | IAR2, IAA28                   | IAA28 (IAA-ALANINE RESISTANT 2); transcription factor                                                                                              | AUX/IAA      |
| AT5G28590 | Yellow |                               | DNA-binding protein-related                                                                                                                        |              |
| AT5G28770 | Yellow | BZO2H3, ATBZIP63              | BZO2H3 (basic leucine zipper O2 homolog 3); DNA binding / transcription factor                                                                     | bZIP         |
| AT5G35750 | Yellow | AHK2                          | AHK2 (ARABIDOPSIS HISTIDINE KINASE 2)                                                                                                              | Orphans      |
| AT5G36670 | Yellow |                               | PHD finger family protein                                                                                                                          | PHD          |
| AT5G37260 | Yellow | RVE2, CIR1                    | myb family transcription factor                                                                                                                    | MYB-related  |
| AT5G38690 | Yellow |                               | unknown protein                                                                                                                                    |              |
| AT5G39660 | Yellow | CDF2, AtDof5. 2               | CDF2 (CYCLING DOF FACTOR 2); DNA binding / protein binding / transcription factor, CDF2 (CYCLING DOF FACTOR 2); DNA binding / transcription factor | C2C2-Dof     |
| AT5G39760 | Yellow | ATHB23                        | ATHB23 (ARABIDOPSIS THALIANA HOMEODOMAIN PROTEIN 23); DNA binding / transcription factor                                                           | zf-HD        |
| AT5G45050 | Yellow | ATWRKY16, TTR1                | TTR1 (WRKY domain family protein 16); transcription factor                                                                                         | WRKY         |
| AT5G45270 | Yellow | RRS1                          |                                                                                                                                                    |              |
| AT5G46760 | Yellow | bHLH005, ATR2                 | basic helix-loop-helix (bHLH) family protein                                                                                                       | bHLH         |
| AT5G47220 | Yellow | ATERF-2, ERF2, ATERF2         | ATERF-2/ATERF2/ERF2 (ETHYLENE RESPONSE FACTOR 2); DNA binding / transcription factor/ transcriptional activator                                    | AP2-EREBP    |
| AT5G47230 | Yellow | ATERF5, ATERF-5, ERF5         | ERF5 (ETHYLENE RESPONSIVE ELEMENT BINDING FACTOR 5); DNA binding / transcription factor/ transcriptional activator                                 | AP2-EREBP    |
| AT5G47640 | Yellow | NF-YB2, HAP3b                 | CCAAT-box binding transcription factor subunit B (NF-YB) (HAP3 ) (AHAP3) family (Hap3b)                                                            | CCAAT        |
| AT5G48560 | Yellow | bHLH078                       | basic helix-loop-helix (bHLH) family protein                                                                                                       | bHLH         |
| AT5G49450 | Yellow | ATBZIP1                       | bZIP family transcription factor                                                                                                                   | bZIP         |
| AT5G50010 | Yellow |                               | transcription factor/ transcription regulator                                                                                                      |              |
| AT5G50820 | Yellow | ANAC097                       | ANAC097 (Arabidopsis NAC domain containing protein 97); transcription factor                                                                       | NAC          |
| AT5G53980 | Yellow | ATHB52                        | ATHB52 (ARABIDOPSIS THALIANA HOMEODOMAIN PROTEIN 52); transcription factor                                                                         | HB           |
| AT5G56270 | Yellow | ATWRKY2, WRKY2, WRKY23        | WRKY2 (WRKY DNA-binding protein 2); transcription factor                                                                                           | WRKY         |
| AT5G57150 | Yellow | bHLH035                       | basic helix-loop-helix (bHLH) family protein                                                                                                       | bHLH         |
| AT5G57410 | Yellow |                               | unknown protein                                                                                                                                    |              |
| AT5G57580 | Yellow |                               | calmodulin-binding protein                                                                                                                         |              |
| AT5G57620 | Yellow | ATMYB36                       | MYB36 (myb domain protein 36); DNA binding / transcription factor                                                                                  | MYB          |
| AT5G57660 | Yellow | COL5                          | zinc finger (B-box type) family protein                                                                                                            | C2C2-CO-like |
| AT5G58900 | Yellow |                               | myb family transcription factor                                                                                                                    | MYB          |
| AT5G59780 | Yellow | ATMYB59                       | MYB59 (myb domain protein 59); DNA binding / transcription factor                                                                                  | MYB-related  |
| AT5G60120 | Yellow | TOE2                          | TOE2 (TARGET OF EAT1 2); DNA binding / transcription factor                                                                                        | AP2-EREBP    |

miR172,

|           |        |                     |                                                                                                                   |           |                |
|-----------|--------|---------------------|-------------------------------------------------------------------------------------------------------------------|-----------|----------------|
| AT5G60450 | Yellow | ARF4                | ARF4 (AUXIN RESPONSE FACTOR 4); transcription factor                                                              | ARF       |                |
| AT5G60690 | Yellow | IFL1, REV           | REV (REVOLUTA); DNA binding / lipid binding / transcription factor                                                | HB        | miR166/miR165, |
| AT5G60910 | Yellow | FUL, AGL8           | AGL8 (AGAMOUS-LIKE 8), AGL8 (AGAMOUS-LIKE 8); transcription factor                                                | MADS      |                |
| AT5G60970 | Yellow | TCP5                | TCP family transcription factor, putative                                                                         | TCP       |                |
| AT5G61420 | Yellow | HAG1, PMG1, ATMYB28 | MYB28 (myb domain protein 28); DNA binding / transcription factor                                                 |           |                |
| AT5G62165 | Yellow | AGL42               | AGL42 (AGAMOUS LIKE 42); transcription factor                                                                     | MADS      |                |
| AT5G62430 | Yellow | CDF1, AtDof5,5      | CDF1 (CYCLING DOF FACTOR 1); DNA binding / protein binding / transcription factor                                 | C2C2-Dof  |                |
| AT5G64340 | Yellow | bHLH142, SAC51      | SAC51 (SUPPRESSOR OF ACAULIS 51); transcription factor/ transcription regulator                                   |           |                |
| AT5G65210 | Yellow | TGA1                | DNA binding / calmodulin binding / transcription factor, bZIP family transcription factor (TGA1)                  | bZIP      |                |
| AT5G65790 | Yellow | AtMYB68             | MYB68 (myb domain protein 68); DNA binding / transcription factor                                                 | MYB       |                |
| AT5G66300 | Yellow | ANAC105, VND3       | ANAC105/VND3 (Arabidopsis NAC domain containing protein 105, VASCULAR-RELATED NAC-DOMAIN 3); transcription factor | NAC       |                |
| AT5G66320 | Yellow |                     | zinc finger (GATA type) family protein                                                                            | C2C2-GATA |                |
| AT5G67180 | Yellow | TOE3                | AP2 domain-containing transcription factor, putative                                                              | AP2-EREBP | miR172,        |
