# Supplementary material for: Weighted Gene Correlation Network Analysis (WGCNA) of Arabidopsis Somatic Embryogenesis (SE) and Identification of Key Gene Modules to Uncover SE-Associated Hub Genes
Source: Hindawi journal article supplement (doi:10.1155/2022/7471063), 2022-07-04
Supplement: f7 [file 7471063.f7.pdf]

**Table S7. The list of microRNA-targeted TFs**

| Gene identifier | Module        | Alias                           | Description                                                                                                                                      | TF Family (PlantTFDB) | Target of miRNA |
|-----------------|---------------|---------------------------------|--------------------------------------------------------------------------------------------------------------------------------------------------|-----------------------|-----------------|
| AT2G28550       | Yellow        | TOE1, RAP2.7                    | TOE1 (TARGET OF EAT1 1); DNA binding / transcription factor                                                                                      | AP2-EREBP             | miR172          |
| AT2G39250       | Turquoise     | SNZ                             | SNZ (SCHNARCHZAPFEN); DNA binding / transcription factor                                                                                         | AP2-EREBP             | miR172          |
| AT3G54990       | Red           | SMZ                             | SMZ (SCHLAFMUTZE), SMZ (SCHLAFMUTZE); DNA binding / transcription factor                                                                         | AP2-EREBP             | miR172          |
| AT4G36920       | Green         | FL1, FLO2, AP2                  | AP2 (APETALA 2); transcription factor                                                                                                            | AP2-EREBP             | miR172          |
| AT5G60120       | Yellow        | TOE2                            | TOE2 (TARGET OF EAT1 2); DNA binding / transcription factor                                                                                      | AP2-EREBP             | miR172          |
| AT5G67180       | Yellow        | TOE3                            | AP2 domain-containing transcription factor, putative                                                                                             | AP2-EREBP             | miR172          |
| AT1G30330       | Darkturquoise | ARF6                            | ARF6 (AUXIN RESPONSE FACTOR 6), ARF6 (AUXIN RESPONSE FACTOR 6); transcription factor                                                             | ARF                   | miR167          |
| AT1G77850       | Yellow        | ARF17                           | ARF17 (AUXIN RESPONSE FACTOR 17); transcription factor                                                                                           | ARF                   | miR160          |
| AT2G28350       | Blue          | ARF10                           | ARF10 (AUXIN RESPONSE FACTOR 10); miRNA binding / transcription factor                                                                           | ARF                   | miR160          |
| AT4G30080       | Brown         | ARF16                           | ARF16 (AUXIN RESPONSE FACTOR 16); miRNA binding / transcription factor                                                                           | ARF                   | miR160          |
| AT5G37020       | Blue          | ARF8                            | ARF8 (AUXIN RESPONSE FACTOR 8), ARF8 (AUXIN RESPONSE FACTOR 8); transcription factor                                                             | ARF                   | miR167          |
| AT3G23690       | Green         | bHLH077                         | basic helix-loop-helix (bHLH) family protein                                                                                                     | bHLH                  | miR393          |
| AT1G17590       | Yellow        | NF-YA8                          | CCAAT-binding transcription factor (CBF-B/NF-YA) family protein                                                                                  | CCAAT                 | miR169          |
| AT1G54160       | Turquoise     | NFYA5, NF-YA5                   | CCAAT-binding transcription factor (CBF-B/NF-YA) family protein                                                                                  | CCAAT                 | miR169          |
| AT1G72830       | Turquoise     | NF-YA3, ATHAP2C, HAP2C          | HAP2C (Heme activator protein (yeast) homolog 2C); transcription factor                                                                          | CCAAT                 | miR169          |
| AT3G05690       | Yellow        | NF-YA2, ATHAP2B, HAP2B, UNE8    | HAP2B (Heme activator protein (yeast) homolog 2B, unfertilized embryo sac 8); transcription factor                                               | CCAAT                 | miR169          |
| AT3G20910       | Turquoise     | NF-YA9                          | CCAAT-binding transcription factor (CBF-B/NF-YA) family protein                                                                                  | CCAAT                 | miR169          |
| AT5G06510       | Yellow        | NF-YA10                         | CCAAT-binding transcription factor (CBF-B/NF-YA) family protein                                                                                  | CCAAT                 | miR169          |
| AT5G12840       | Cyan          | NF-YA1, ATHAP2A, HAP2A, EMB2220 | HAP2A (EMBRYO DEFECTIVE 2220); transcription factor                                                                                              | CCAAT                 | miR169          |
| AT2G45160       | Yellow        |                                 | scarecrow transcription factor family protein                                                                                                    | GRAS                  | miR170/miR171   |
| AT3G60630       | Yellow        |                                 | scarecrow transcription factor family protein                                                                                                    | GRAS                  | miR170/miR171   |
| AT4G00150       | Yellow        | SCL6                            | scarecrow-like transcription factor 6 (SCL6)                                                                                                     | GRAS                  | miR170/miR171   |
| AT2G22840       | Turquoise     | ATGRF1                          | AtGRF1 (GROWTH-REGULATING FACTOR 1)                                                                                                              | GRF                   | miR396          |
| AT2G36400       | Turquoise     | ATGRF3                          | AtGRF3 (GROWTH-REGULATING FACTOR 3)                                                                                                              | GRF                   | miR396          |
| AT3G52910       | Turquoise     | ATGRF4                          | AtGRF4 (GROWTH-REGULATING FACTOR 4)                                                                                                              | GRF                   | miR396          |
| AT4G24150       | Brown         | ATGRF8                          | AtGRF8 (GROWTH-REGULATING FACTOR 8)                                                                                                              | GRF                   | miR396          |
| AT4G37740       | Turquoise     | ATGRF2                          | AtGRF2 (GROWTH-REGULATING FACTOR 2)                                                                                                              | GRF                   | miR396          |
| AT5G53660       | Pink          | ATGRF7                          | AtGRF7 (GROWTH-REGULATING FACTOR 7)                                                                                                              | GRF                   | miR396          |
| AT1G30490       | Green         | ATHB9, PHV                      | PHV (PHAVOLUTA); DNA binding / transcription factor                                                                                              | HB                    | miR166/miR165   |
| AT1G52150       | Green         | ATHB15, ICU4, CNA, ATHB-15      | ATHB-15 (INCURVATA 4), ATHB-15 (INCURVATA 4); DNA binding / transcription factor                                                                 | HB                    | miR166/miR165   |
| AT2G34710       | Blue          | ATHB14, PHB-1D, ATHB-14, PHB    | PHB (PHABULOSA); DNA binding / transcription factor                                                                                              | HB                    | miR166/miR165   |
| AT4G32880       | Green         | ATHB8, ATHB-8                   | ATHB-8 (HOMEBOX GENE 8); DNA binding / transcription factor                                                                                      | HB                    | miR166/miR165   |
| AT5G60690       | Yellow        | IFL1, REV                       | REV (REVOLUTA); DNA binding / lipid binding / transcription factor                                                                               | HB                    | miR166/miR165   |
| AT3G57230       | Yellow        | AGL16                           | AGL16 (AGAMOUS-LIKE 16), AGL16 (AGAMOUS-LIKE 16); transcription factor                                                                           | MADS                  | miR824          |
| AT1G66370       | Turquoise     | ATMYB113                        | MYB113 (myb domain protein 113); DNA binding / transcription factor                                                                              | MYB                   | miR828          |
| AT2G32460       | Turquoise     | ATMYB101, AtM1                  | AtM1/AtMYB101/MYB101 (myb domain protein 101), AtM1/AtMYB101/MYB101 (myb domain protein 101); DNA binding / transcription factor                 | MYB                   | miR159/miR319   |
| AT2G47460       | Green         | PFG1, ATMYB12                   | MYB12 (myb domain protein 12); DNA binding / transcription factor/ transcriptional activator                                                     | MYB                   | miR858          |
| AT3G11440       | Pink          | AtMYB65                         | ATMYB65 (myb domain protein 65); DNA binding / transcription factor                                                                              | MYB                   | miR159/miR319   |
| AT5G06100       | Yellow        | ATMYB33                         | ATMYB33/MYB33 (myb domain protein 33), ATMYB33/MYB33 (myb domain protein 33); DNA binding / transcription factor                                 | MYB                   | miR159/miR319   |
| AT1G56010       | Yellow        | NAC1, ANAC021, ANAC022          | NAC1 (Arabidopsis NAC domain containing protein 21, Arabidopsis NAC domain containing protein 22); transcription factor                          | NAC                   | miR164          |
| AT5G07680       | Tan           | ANAC079, ATNAC4, ANAC080        | ANAC079/ANAC080/ATNAC4 (Arabidopsis NAC domain containing protein 79, Arabidopsis NAC domain containing protein 80); transcription factor        | NAC                   | miR164          |
| AT5G39610       | Tan           | AtNAC2, ANAC092, ATNAC6         | ANAC092/ATNAC2/ATNAC6 (Arabidopsis NAC domain containing protein 92); protein heterodimerization/ protein homodimerization/ transcription factor | NAC                   | miR164          |
| AT5G53950       | Blue          | CUC2, ANAC098                   | CUC2 (CUP-SHAPED COTYLEDON 2); transcription factor                                                                                              | NAC                   | miR164          |
| AT5G61430       | Turquoise     | ANAC100, ATNAC5                 | ANAC100/ATNAC5 (Arabidopsis NAC domain containing protein 100); transcription factor                                                             | NAC                   | miR164          |
| AT1G27360       | Green         | SPL11                           | squamosa promoter-binding protein-like 11 (SPL11)                                                                                                | SBP                   | miR156/miR157   |
| AT1G27370       | Green         | SPL10                           | DNA binding, squamosa promoter-binding protein-like 10 (SPL10)                                                                                   | SBP                   | miR156/miR157   |
| AT1G69170       | Brown         | SPL6                            | squamosa promoter-binding protein-like 6 (SPL6)                                                                                                  | SBP                   | miR156/miR157   |
| AT2G42200       | Tan           | SPL9                            | squamosa promoter-binding protein-like 9 (SPL9)                                                                                                  | SBP                   | miR156/miR157   |
| AT3G57920       | Turquoise     | SPL15, MSC1                     | squamosa promoter-binding protein, putative                                                                                                      | SBP                   | miR156/miR157   |

|           |           |                |                                                                                                                                                   |     |               |
|-----------|-----------|----------------|---------------------------------------------------------------------------------------------------------------------------------------------------|-----|---------------|
| AT5G43270 | Green     | SPL2           | SPL2 (SQUAMOSA PROMOTER BINDING PROTEIN-LIKE 2); DNA binding, SPL2 (SQUAMOSA PROMOTER BINDING PROTEIN-LIKE 2); DNA binding / transcription factor | SBP | miR156/miR157 |
| AT5G50570 | Brown     | SPL13          | squamosa promoter-binding protein, putative                                                                                                       | SBP | miR156/miR157 |
| AT2G22740 | Turquoise | SDG23, SUVH6   | SUVH6 (SU(VAR)3-9 homolog 6)                                                                                                                      | SET | miR778        |
| AT2G35160 | Turquoise | SGD9, SUVH5    | SUVH5 (SU(VAR)3-9 HOMOLOG 5)                                                                                                                      | SET | miR778        |
| AT1G30210 | Turquoise | ATTCP24, TCP24 | TCP24; transcription factor                                                                                                                       | TCP | miR159/miR319 |
| AT1G53230 | Turquoise | TCP3           | TCP3 (TCP family transcription factor 3); transcription factor                                                                                    | TCP | miR159/miR319 |
| AT2G31070 | Red       | TCP10          | TCP10 (TCP domain protein 10); transcription factor                                                                                               | TCP | miR159/miR319 |
| AT3G15030 | Turquoise | TCP4, MEE35    | TCP4 (TCP family transcription factor 4, maternal effect embryo arrest 35); transcription factor                                                  | TCP | miR159/miR319 |
| AT4G18390 | Turquoise | TCP2           | TCP family transcription factor, putative                                                                                                         | TCP | miR159/miR319 |
