# Supplementary material for: Weighted Gene Correlation Network Analysis (WGCNA) of Arabidopsis Somatic Embryogenesis (SE) and Identification of Key Gene Modules to Uncover SE-Associated Hub Genes
Source: Hindawi journal article supplement (doi:10.1155/2022/7471063), 2022-07-04
Supplement: f8 [file 7471063.f8.pdf]

**Table S8. Distribution of genes encoding epigenetic regulators across network modules**

| Function category                                  | Gene identifier | Module        | Gene acronym                     | Gene name                                                                  | Confirmed or putative function of protein                                           |
|----------------------------------------------------|-----------------|---------------|----------------------------------|----------------------------------------------------------------------------|-------------------------------------------------------------------------------------|
| RNA silencing                                      | AT1G01040       | Yellow        | <i>DCL1/CAF1/SINI/EMB76/SUS1</i> | Dicer-like, Carpel factory, short integuments, embryo-defective, suspensor | microRNAs (miRNA) processing                                                        |
| Chromatin formation or chromatin remodeling        | AT1G03790       | Brown         | <i>SOM</i>                       | Decreased DNA methylation, somniferous                                     | PAZ-PIWI domain protein, translational repression                                   |
| RNA silencing                                      | AT1G05460       | Turquoise     | <i>SDE3</i>                      | Silencing-defective                                                        | PAZ-PIWI domain protein, translational repression                                   |
| Polycomb-group proteins and interacting components | AT1G06770       | Red           | <i>BM11b</i>                     | B cell-specific Mo-MLV integration site 1                                  | PAZ-PIWI domain protein, siRNA-binding                                              |
| Chromatin formation or chromatin remodeling        | AT1G08060       | Red           | <i>MOM1</i>                      | Morpheus' molecule                                                         | PAZ-PIWI domain protein, siRNA-binding                                              |
| RNA silencing                                      | AT1G08260       | Blue          | <i>ESD7</i>                      | Early in short days                                                        | PAZ-PIWI domain protein                                                             |
| Histone modification                               | AT1G08460       | Pink          | <i>HDA08</i>                     | Histone deacetylase                                                        | PAZ-PIWI domain protein, female gametophyte formation, siRNA binding                |
| Histone modification                               | AT1G08620       | Blue          | <i>JMJ16</i>                     | Arabidopsis thaliana jumonji                                               | Subunits of INO80 complex                                                           |
| RNA silencing                                      | AT1G13790       | Red           | <i>FDM4</i>                      | Factor of DNA methylation                                                  | Subunits of INO80 complex                                                           |
| Histone modification                               | AT1G14400       | Blue          | <i>UBC1</i>                      | E2 ubiquitin-conjugating enzyme                                            | Histone chaperone H3/H4                                                             |
| RNA silencing                                      | AT1G14790       | Yellow        | <i>RDR1</i>                      | RNA-dependent RNA polymerase                                               | Histone methyltransferase                                                           |
| DNA modification                                   | AT1G15340       | Turquoise     | <i>MBD10</i>                     | Methylcytosine-binding domain protein                                      | Histone methyltransferase (ATXR5,-6: H3K27me1)                                      |
| RNA silencing                                      | AT1G15910       | Turquoise     | <i>FDM1</i>                      | Factor of DNA methylation                                                  | Histone methyltransferase (ATXR5,-6: H3K27me1)                                      |
| RNA silencing                                      | AT1G16610       | Black         | <i>SR45</i>                      | Arginine/serine-rich                                                       | PRC1 subunit                                                                        |
| Histone modification                               | AT1G16710       | Blue          | <i>HAC12</i>                     | Histone acetyltransferase CBP-like                                         | PRC1 subunit                                                                        |
| Chromatin formation or chromatin remodeling        | AT1G18450       | Blue          | <i>ARP4</i>                      | Actin-related protein                                                      | SWI2/SNF2 ATPase family protein                                                     |
| Chromatin formation or chromatin remodeling        | AT1G18800       | Green         | <i>NRP2</i>                      | NAP (nucleosome assembly protein)-related protein                          | Subunit of SWI/SNF-remodeling complexes                                             |
| Chromatin formation or chromatin remodeling        | AT1G19100       | Turquoise     | <i>DMS11</i>                     | Defective in meristem silencing                                            | Chromodomain remodeling complex                                                     |
| Chromatin formation or chromatin remodeling        | AT1G21700       | Purple        | <i>SW13C</i>                     | Arabidopsis homolog of SW13                                                | SWI2/SNF2 family ATPase                                                             |
| Histone modification                               | AT1G32750       | Turquoise     | <i>HAF1</i>                      | Histone acetyltransferase CBP-like                                         | ISWI-like chromatin remodeling protein                                              |
| RNA silencing                                      | AT1G48410       | Magenta       | <i>AGO1</i>                      | Argonaute                                                                  | SNF2/Brahma-type protein                                                            |
| RNA silencing                                      | AT1G48920       | Blue          | <i>NUC-11</i>                    | Nucleolin-like                                                             | Polycomb-group protein (E(z))                                                       |
| RNA silencing                                      | AT1G54490       | Blue          | <i>XRN4/EIN5</i>                 | XRN homolog, ethylene insensitive                                          | DNA methyltransferase (mainly CHG and CHH)                                          |
| Histone modification                               | AT1G55970       | Turquoise     | <i>HAC4</i>                      | Histone acetyltransferase CBP-like                                         | Subunit of E3 ligase complex, MS11 interactor                                       |
| DNA modification                                   | AT1G57820       | Darkturquoise | <i>VIM1</i>                      | Variant in methylation                                                     | LHP1 and H3 interaction                                                             |
| Histone modification                               | AT1G62310       | Turquoise     | <i>JMJ29</i>                     | Arabidopsis thaliana jumonji                                               | RNase III (dsRNase), miRNA and siRNA generation                                     |
| RNA silencing                                      | AT1G63020       | Brown         | <i>NRPD1/SDE4</i>                | Nuclear RNA polymerase IV, silencing defective 4                           | RNase III (dsRNase), siRNA generation                                               |
| Chromatin formation or chromatin remodeling        | AT1G65470       | Lightcyan     | <i>FAS1</i>                      | Fasciated                                                                  | RNase III (dsRNase), siRNA generation                                               |
| Chromatin formation or chromatin remodeling        | AT1G66740       | Blue          | <i>ASF1A</i>                     | Arabidopsis antisilencing factor                                           | RNase III (dsRNase), siRNA generation                                               |
| RNA silencing                                      | AT1G69440       | Turquoise     | <i>AGO7/ZIP</i>                  | Argonaute, Zippy                                                           | Subunit of E3 ligase complex, MS11 interactor                                       |
| DNA modification                                   | AT1G69770       | Lightyellow   | <i>CMT3</i>                      | Chromomethyltransferase                                                    | Subunit of E3 ligase complex, MS11 interactor                                       |
| Histone modification                               | AT1G73100       | Blue          | <i>SUVH3</i>                     | SET domain group 19                                                        | FHA domain protein, miRNA processing                                                |
| Chromatin formation or chromatin remodeling        | AT1G74560       | Blue          | <i>NRP1</i>                      | NAP (nucleosome assembly protein)-related protein                          | DNA glycosylase-domain protein, cytosine demethylation                              |
| RNA silencing                                      | AT1G75660       | Green         | <i>XRN3</i>                      | XRN homolog                                                                | DNA glycosylase-domain protein, cytosine demethylation                              |
| Histone modification                               | AT1G79000       | Blue          | <i>HAC1</i>                      | Histone acetyltransferase CBP-like                                         | DNA glycosylase-domain protein, cytosine demethylation                              |
| RNA silencing                                      | AT1G80790       | Magenta       | <i>FDM5</i>                      | Factor of DNA methylation                                                  | GHKL ATPase, interaction with DMS3                                                  |
| Histone modification                               | AT2G02760       | Blue          | <i>UBC2</i>                      | E2 ubiquitin-conjugating enzyme                                            | Structural-maintenance-of-chromosomes protein; required for RNA Pol V transcription |
| RNA silencing                                      | AT2G13540       | Brown         | <i>ABH1/CBP80</i>                | ABA-hypersensitive, cap-binding complex                                    | Interaction with HD2                                                                |
| RNA silencing                                      | AT2G15400       | Lightcyan     | <i>NRPE3b</i>                    | Nuclear RNA polymerases II, IV, and V                                      | Dicer-interacting proteins, siRNA processing                                        |
| Chromatin formation or chromatin remodeling        | AT2G16390       | Turquoise     | <i>DRD1</i>                      | Defective in RNA-directed DNA methylation                                  | Dicer-interacting proteins, siRNA processing                                        |
| Histone modification                               | AT2G17900       | Yellow        | <i>SDG37</i>                     | SET domain group 37                                                        | Dicer-interacting proteins, siRNA processing                                        |
| Chromatin formation or chromatin remodeling        | AT2G19480       | Blue          | <i>NAP1;2</i>                    | Arabidopsis nucleosome assembly protein                                    | SWI2/SNF2 ATPase; required for RNA Pol V transcription                              |
| Polycomb-group proteins and interacting components | AT2G19520       | Black         | <i>MSI4/FVE</i>                  | Multicopy suppressor of IRA homolog                                        | Major de novo DNA methyltransferase (CG, CHG, and CHH)                              |
| Histone modification                               | AT2G22740       | Turquoise     | <i>SUVH6</i>                     | Su(Var)3-9 homolog                                                         | Histone demethylase (H3K4me1,-2,-3)                                                 |
| Polycomb-group proteins and interacting components | AT2G23380       | Yellow        | <i>CLF</i>                       | Curly leaf                                                                 | Histone acetyl transferase complex                                                  |
| Chromatin formation or chromatin remodeling        | AT2G24490       | Green         | <i>RPA2</i>                      | Replication protein A                                                      | Polycomb-group protein (Su(z)12)                                                    |
| Chromatin formation or chromatin remodeling        | AT2G25170       | Yellow        | <i>PKL</i>                       | Pickle                                                                     | Subunit of DNA polymerase epsilon                                                   |
| RNA silencing                                      | AT2G27040       | Turquoise     | <i>AGO4</i>                      | Argonaute                                                                  | Chromatin assembly factor subunit H3/H4                                             |
| RNA silencing                                      | AT2G27100       | Cyan          | <i>SE</i>                        | Serrate                                                                    | Chromatin assembly factor subunit H3/H4                                             |
| Histone modification                               | AT2G27350       | Green         | <i>OTLD1</i>                     | Otubain-like deubiquitinase                                                | RRM-domain protein                                                                  |
| Histone modification                               | AT2G27840       | Green         | <i>HD2d/HDT4</i>                 | Histone deacetylase                                                        | dsRNA-binding protein (FDM1)                                                        |
| Chromatin formation or chromatin remodeling        | AT2G28290       | Greenyellow   | <i>SYD</i>                       | Splayed                                                                    | dsRNA-binding protein (FDM1)                                                        |
| RNA silencing                                      | AT2G28380       | Turquoise     | <i>DRB2</i>                      | Double-stranded RNA-binding protein                                        | dsRNA-binding protein (FDM1)                                                        |
| RNA silencing                                      | AT2G30280       | Blue          | <i>RDM4/DMS4</i>                 | RNA-directed DNA methylation, defective in meristem silencing              | dsRNA-binding protein (FDM1)                                                        |
| Polycomb-group proteins and interacting components | AT2G30580       | Turquoise     | <i>BM11a</i>                     | B cell-specific Mo-MLV integration site 1                                  | Polycomb-group protein (Esc)                                                        |

|                                                    |           |           |                       |                                                                                 |                                                             |
|----------------------------------------------------|-----------|-----------|-----------------------|---------------------------------------------------------------------------------|-------------------------------------------------------------|
| RNA silencing                                      | AT2G32940 | Black     | <i>AGO6</i>           | Argonaute                                                                       | Histone demethylases                                        |
| Histone modification                               | AT2G33290 | Yellow    | <i>SUVH2</i>          | Su(Var)3-9 homolog                                                              | Histone acetyltransferase                                   |
| Chromatin formation or chromatin remodeling        | AT2G33610 | Blue      | <i>SWI3B</i>          | Arabidopsis homolog of SWI3                                                     | Histone acetyltransferase                                   |
| Histone modification                               | AT2G35160 | Turquoise | <i>SUVH5</i>          | Su(Var)3-9 homolog                                                              | Histone acetyltransferase                                   |
| DNA modification                                   | AT2G36490 | Turquoise | <i>DML1/ROS1</i>      | Repressor of silencing                                                          | Histone acetyltransferase                                   |
| RNA silencing                                      | AT2G40030 | Turquoise | <i>NRPE1/DRD3</i>     | Nuclear RNA Pol V, defective in RNA-directed DNA methylation                    | Histone deacetylase                                         |
| Histone modification                               | AT2G44950 | Lightcyan | <i>HUB1</i>           | E3 ubiquitin ligase                                                             | Histone acetyltransferase                                   |
| Chromatin formation or chromatin remodeling        | AT2G46020 | Turquoise | <i>BRM</i>            | Brahma                                                                          | Histone acetyltransferase                                   |
| Chromatin formation or chromatin remodeling        | AT2G47620 | Blue      | <i>SWI3A</i>          | Arabidopsis homolog of SWI3                                                     | Histone acetyltransferase (H3K14ac)                         |
| RNA silencing                                      | AT3G03300 | Green     | <i>DCL2</i>           | Dicer-like                                                                      | Histone acetyltransferase (H3K14ac)                         |
| RNA silencing                                      | AT3G05040 | Purple    | <i>HST</i>            | Hasty                                                                           | Histone acetyltransferase                                   |
| Chromatin formation or chromatin remodeling        | AT3G06010 | Magenta   | <i>CHR12</i>          | Arabidopsis chromatin remodeling                                                | Histone acetyltransferase                                   |
| Chromatin formation or chromatin remodeling        | AT3G06400 | Black     | <i>CHR11</i>          | Chromatin-remodeling protein                                                    | Atypical histone deacetylase                                |
| Histone modification                               | AT3G07610 | Brown     | <i>IBM1</i>           | Increase in bonsai methylation                                                  | Atypical histone deacetylase                                |
| DNA modification                                   | AT3G10010 | Turquoise | <i>DML2</i>           | Demeter-like proteins                                                           | Atypical histone deacetylase                                |
| Histone modification                               | AT3G10390 | Cyan      | <i>FLD</i>            | Flowering locus D, LDS1-like                                                    | Histone deacetylase                                         |
| Chromatin formation or chromatin remodeling        | AT3G12380 | Red       | <i>ARP5</i>           | Actin-related protein                                                           | Histone deacetylase                                         |
| RNA silencing                                      | AT3G12550 | Turquoise | <i>FD3M3</i>          | Factor of DNA methylation                                                       | Histone deacetylase                                         |
| Histone modification                               | AT3G12980 | Yellow    | <i>HAC5</i>           | Histone acetyltransferase CBP-like                                              | Histone deacetylase                                         |
| Histone modification                               | AT3G13682 | Pink      | <i>LDL2</i>           | Flowering locus D, LDS1-like                                                    | Histone deacetylase                                         |
| DNA modification                                   | AT3G14890 | Turquoise | <i>ZDP</i>            | Zinc finger DNA 3'-phosphoesterase                                              | Histone deacetylase                                         |
| RNA silencing                                      | AT3G16980 | Turquoise | <i>NRPB9a</i>         | Nuclear RNA polymerases II, IV, and V                                           | Histone deacetylase                                         |
| Chromatin formation or chromatin remodeling        | AT3G17590 | Green     | <i>BSH</i>            | Bushy                                                                           | Histone deacetylase                                         |
| Histone modification                               | AT3G18520 | Lightcyan | <i>HDA15</i>          | Histone deacetylase                                                             | Histone deacetylase                                         |
| Histone modification                               | AT3G19040 | Pink      | <i>HAF2</i>           | Histone acetyltransferase CBP-like                                              | dsRNA-binding, RNA methyltransferase                        |
| RNA silencing                                      | AT3G20550 | Pink      | <i>DDL</i>            | Dawdle                                                                          | Histone chaperone H3/H4                                     |
| Polycomb-group proteins and interacting components | AT3G20740 | Red       | <i>FIE, FIS3</i>      | Fertilization-independent endosperm, fertilization-independent seeds            | DNA methylation-dependent gene silencing                    |
| RNA silencing                                      | AT3G22680 | Blue      | <i>RDMI</i>           | RNA-directed DNA methylation                                                    | miRNA export receptor                                       |
| RNA silencing                                      | AT3G22900 | Turquoise | <i>NRPD7a</i>         | Nuclear RNA Pol IV                                                              | H2B monoubiquitination                                      |
| Polycomb-group proteins and interacting components | AT3G24440 | Blue      | <i>VRN5</i>           | Vernalization                                                                   | Histone demethylase                                         |
| RNA silencing                                      | AT3G26932 | Turquoise | <i>DRB3</i>           | Double-stranded RNA-binding protein                                             | Subunits of INO80 complex                                   |
| Chromatin formation or chromatin remodeling        | AT3G28730 | Magenta   | <i>SSRP1</i>          | Structure-specific recognition protein                                          | Histone demethylase (H3K4me1,2,-3)                          |
| RNA silencing                                      | AT3G43920 | Red       | <i>DCL3</i>           | Dicer-like                                                                      | Histone demethylase                                         |
| Histone modification                               | AT3G44490 | Blue      | <i>HDA17</i>          | Histone deacetylase                                                             | Histone demethylase                                         |
| Chromatin formation or chromatin remodeling        | AT3G44530 | Green     | <i>HIRA</i>           | Histone regulator A                                                             | Histone demethylase                                         |
| Polycomb-group proteins and interacting components | AT3G44600 | Brown     | <i>CYP71</i>          | Cyclophilin                                                                     | Putative Histone demethylase (H3K9me2)                      |
| Histone modification                               | AT3G44680 | Blue      | <i>HDA9</i>           | Histone deacetylase                                                             | Part of RdDM effector complex                               |
| Histone modification                               | AT3G44750 | Blue      | <i>HDA3</i>           | Histone deacetylase                                                             | Histone demethylases                                        |
| Chromatin formation or chromatin remodeling        | AT3G49250 | Turquoise | <i>DMS3/IDN1</i>      | Defective in meristem silencing, involved in de novo                            | RNA processing, LHP1 interaction                            |
| RNA silencing                                      | AT3G49500 | Green     | <i>RDR6/SDE1/SGS2</i> | RNA-dependent RNA polymerase, silencing defective, suppressor of gene silencing | Methylcytosine-binding protein                              |
| Histone modification                               | AT3G54610 | Blue      | <i>HAG1</i>           | Histone acetyltransferase GCNS-like                                             | Methylcytosine-binding protein                              |
| RNA silencing                                      | AT3G57080 | Turquoise | <i>NRPE5</i>          | Nuclear RNA Pol V                                                               | Cytosine methyltransferase                                  |
| Chromatin formation or chromatin remodeling        | AT3G57300 | Green     | <i>INO80</i>          | Inositol-requiring                                                              | DNA topoisomerase                                           |
| RNA silencing                                      | AT3G62800 | Pink      | <i>DRB4</i>           | Double-stranded RNA-binding protein                                             | Genetic interaction with RNA Pol V                          |
| Polycomb-group proteins and interacting components | AT4G00830 | Blue      | <i>LIF2</i>           | LHP1-interacting factor                                                         | Chromatin assembly factor subunit, H3/H4                    |
| Histone modification                               | AT4G00990 | Yellow    | <i>JMJ27</i>          | Arabidopsis thaliana jumonji                                                    | Polycomb-group protein (p55), Cul4-DDB1 and PCR2 interactor |
| Polycomb-group proteins and interacting components | AT4G05420 | Blue      | <i>DDB1A</i>          | Damaged DNA-binding                                                             | Histone chaperone H2A/H2B                                   |
| Chromatin formation or chromatin remodeling        | AT4G10710 | Magenta   | <i>SPT16</i>          | Suppressor of Ty insertion-like                                                 | Histone chaperone H2A/H2B                                   |
| RNA silencing                                      | AT4G11130 | Turquoise | <i>RDR2</i>           | RNA-dependent RNA polymerase                                                    | Histone chaperone H2A/H2B                                   |
| DNA modification                                   | AT4G13940 | Royalblue | <i>HOG1</i>           | Homology-dependent gene silencing                                               | Histone chaperone H2A/H2B                                   |
| RNA silencing                                      | AT4G14660 | Blue      | <i>NRPE7/NRPD7b</i>   | Nuclear RNA Pol V                                                               | Histone chaperone H2A/H2B                                   |
| Histone modification                               | AT4G15180 | Red       | <i>ATXR3/SDG2</i>     | Arabidopsis homolog of trithorax, SET domain group                              | Alternative 9th subunits of Pds II, IV, and V               |
| RNA silencing                                      | AT4G16280 | Blue      | <i>FCA</i>            | Flowering time                                                                  | Pol IV largest subunit                                      |
| Polycomb-group proteins and interacting components | AT4G16845 | Green     | <i>VRN2</i>           | Vernalization                                                                   | Major 7th subunit of RNA Pol IV                             |
| Histone modification                               | AT4G20400 | Red       | <i>JMJ14</i>          | Arabidopsis thaliana jumonji                                                    | RNA Pol V largest subunit                                   |
| RNA silencing                                      | AT4G20910 | Blue      | <i>HEN1</i>           | HUA enhancer                                                                    | Alternative 3rd subunits of Pds II, IV, or V                |
| Polycomb-group proteins and interacting components | AT4G21100 | Blue      | <i>DDB1B</i>          | Damaged DNA-binding                                                             | 5th subunit of RNA Pol V                                    |

|                                                    |           |           |                            |                                                                                                           |                                                                           |
|----------------------------------------------------|-----------|-----------|----------------------------|-----------------------------------------------------------------------------------------------------------|---------------------------------------------------------------------------|
| Chromatin formation or chromatin remodeling        | AT4G26110 | Blue      | <i>NAP1;1</i>              | Arabidopsis nucleosome assembly protein                                                                   | Major 7th subunit of RNA Pol V; alternative seventh subunit of RNA Pol IV |
| Histone modification                               | AT4G28190 | Turquoise | <i>ULT1</i>                | Ultrapepala                                                                                               | rRNA gene regulation                                                      |
| Polycomb-group proteins and interacting components | AT4G30200 | Green     | <i>VEL1</i>                | Vernalization-like                                                                                        | H2B deubiquitination                                                      |
| Histone modification                               | AT4G33470 | Red       | <i>HDA14</i>               | Histone deacetylase                                                                                       | CHD3 chromatin remodeling factor                                          |
| Histone modification                               | AT4G38130 | Blue      | <i>HDA1</i>                | Histone deacetylase                                                                                       | Component of DDR complex required for RNA Pol V transcription             |
| Histone modification                               | AT5G03740 | Purple    | <i>HD2c/HDT3</i>           | Histone deacetylase                                                                                       | IWR1-like regulator of multisubunit RNA polymerase assembly               |
| Histone modification                               | AT5G04240 | Turquoise | <i>ELF6</i>                | Early flowering                                                                                           | RNA-dependent RNA polymerase                                              |
| RNA silencing                                      | AT5G04290 | Turquoise | <i>KTF1/RDM3/SPT5-1</i>    | KOW domain-containing transcription factor, suppressor of Ty insertion-like                               | RNA-dependent RNA polymerase                                              |
| DNA modification                                   | AT5G04560 | Turquoise | <i>DME</i>                 | Demeter                                                                                                   | RNA-dependent RNA polymerase                                              |
| Histone modification                               | AT5G06550 | Blue      | <i>JMJ22</i>               | Arabidopsis thaliana jumonji                                                                              | PRC1 subunit                                                              |
| Histone modification                               | AT5G09230 | Red       | <i>SRT2</i>                | Histone deacetylase SIR2-like                                                                             | DNA glycosylase-domain protein, cytosine demethylation                    |
| Histone modification                               | AT5G09740 | Red       | <i>HAM2</i>                | Histone acetyltransferase Myst-like                                                                       | Single-stranded DNA-binding protein                                       |
| Histone modification                               | AT5G09790 | Magenta   | <i>ATXR5</i>               | Arabidopsis trithorax-related proteins                                                                    | RNA helicase                                                              |
| Histone modification                               | AT5G13960 | Green     | <i>SUVH4/KYP1</i>          | Su(Var)3-9 homolog, kryptonite                                                                            | Histone methylation                                                       |
| Chromatin formation or chromatin remodeling        | AT5G14170 | Magenta   | <i>CHC1</i>                | Clathrin heavy chain 1                                                                                    | Putative histone methyltransferase                                        |
| DNA modification                                   | AT5G14620 | Turquoise | <i>DRM2</i>                | Domains-rearranged methyltransferase                                                                      | Histone methyltransferase                                                 |
| RNA silencing                                      | AT5G20320 | Turquoise | <i>DCL4/SMD</i>            | Dicer-like                                                                                                | Zn finger protein, miRNA processing                                       |
| RNA silencing                                      | AT5G21150 | Turquoise | <i>AGO9</i>                | Argonaute                                                                                                 | Subunit of SWR1                                                           |
| Histone modification                               | AT5G22650 | Blue      | <i>HD2b/HDT2</i>           | Histone deacetylase                                                                                       | Coiled-coil protein                                                       |
| RNA silencing                                      | AT5G23570 | Cyan      | <i>SGS3</i>                | Suppressor of gene silencing                                                                              | SWI2/SNF2 family ATPase                                                   |
| Histone modification                               | AT5G24330 | Brown     | <i>ATXR6</i>               | Arabidopsis trithorax-related proteins                                                                    | Histone chaperone H2A/H2B                                                 |
| DNA modification                                   | AT5G25480 | Blue      | <i>DNMT2</i>               | DNA methyltransferase                                                                                     | Splicing factor                                                           |
| Histone modification                               | AT5G26040 | Brown     | <i>HDA2</i>                | Histone deacetylase                                                                                       | Histone deacetylase                                                       |
| Chromatin formation or chromatin remodeling        | AT5G37055 | Yellow    | <i>SEF/SWC6</i>            | Serrated and early flowering, SWR1 complex                                                                | Histone deacetylase                                                       |
| DNA modification                                   | AT5G39550 | Red       | <i>VIM3</i>                | Variant in methylation                                                                                    | High mobility group (HMG) protein, histone chaperone subunit              |
| Histone modification                               | AT5G42400 | Red       | <i>SDG25</i>               | Arabidopsis homolog of trithorax, SET domain group                                                        | H3K9 methyltransferase                                                    |
| RNA silencing                                      | AT5G42540 | Lightcyan | <i>XRN2</i>                | XRN homolog                                                                                               | Histone methyltransferase                                                 |
| RNA silencing                                      | AT5G43810 | Yellow    | <i>AGO10/PNH/ZLL</i>       | Argonaute, Pinhead, Zwillie                                                                               | H3K9 methyltransferase                                                    |
| Polycomb-group proteins and interacting components | AT5G44280 | Turquoise | <i>RING1a</i>              | RING finger protein                                                                                       | Recognition of DNA methylation (SUVH5)                                    |
| Polycomb-group proteins and interacting components | AT5G46210 | Salmon    | <i>CUL4</i>                | Cullin protein                                                                                            | Recognition of DNA methylation (SUVH5)                                    |
| DNA modification                                   | AT5G49160 | Yellow    | <i>MET1</i>                | Methyltransferase                                                                                         | Subunits of SWITCH/SUCROSE NONFERMENTABLE (SWI/SNF)-remodeling complexes  |
| Histone modification                               | AT5G50320 | Green     | <i>ELO3</i>                | Histone acetyltransferase GNAT-like                                                                       | Subunits of SWITCH/SUCROSE NONFERMENTABLE (SWI/SNF)-remodeling complexes  |
| Polycomb-group proteins and interacting components | AT5G51230 | Blue      | <i>EMF2</i>                | Embryonic flower                                                                                          | Subunits of SWITCH/SUCROSE NONFERMENTABLE (SWI/SNF)-remodeling complexes  |
| Histone modification                               | AT5G53430 | Red       | <i>SDG29</i>               | SET domain group 29                                                                                       | SWI2/SNF2 family ATPase                                                   |
| Chromatin formation or chromatin remodeling        | AT5G55300 | Red       | <i>MGO1</i>                | Mgoun                                                                                                     | H2B monoubiquitination                                                    |
| Histone modification                               | AT5G55760 | Red       | <i>SRT1</i>                | Histone deacetylase SIR2-like                                                                             | H2B monoubiquitination                                                    |
| Histone modification                               | AT5G56740 | Blue      | <i>HAG2</i>                | Histone acetyltransferase GCN5-like                                                                       | Regulator of histone methylation, ATX1 interactor                         |
| Chromatin formation or chromatin remodeling        | AT5G56950 | Blue      | <i>NAP1;3</i>              | Arabidopsis nucleosome assembly protein                                                                   | Homeodomain protein                                                       |
| DNA modification                                   | AT5G58130 | Blue      | <i>ROS3</i>                | Repressor of silencing                                                                                    | Methylcytosine-binding proteins                                           |
| Chromatin formation or chromatin remodeling        | AT5G58230 | Blue      | <i>MSI1</i>                | Multicopy suppressor of IRA homolog                                                                       | DNA methylation                                                           |
| DNA modification                                   | AT5G59380 | Blue      | <i>MBD6</i>                | Methylcytosine-binding domain protein                                                                     | Polycomb-group protein (Su(z)12)                                          |
| Histone modification                               | AT5G61060 | Green     | <i>HDA05</i>               | Histone deacetylase                                                                                       | Homeodomain protein                                                       |
| Histone modification                               | AT5G63110 | Blue      | <i>HDA6/SIL1/AXE1/RTS1</i> | Histone deacetylase, modifier of silencing, auxin-gene repression, RNA-mediated transcriptional silencing | Exoribonuclease                                                           |
| Histone modification                               | AT5G64610 | Green     | <i>HAM1</i>                | Histone acetyltransferase Myst-like                                                                       | Exoribonuclease                                                           |
| Chromatin formation or chromatin remodeling        | AT5G64630 | Green     | <i>FAS2</i>                | Fasciated                                                                                                 | Exoribonuclease, small RNA processing                                     |
| Chromatin formation or chromatin remodeling        | AT5G66750 | Brown     | <i>CHR1/DDMI</i>           | Decreased DNA methylation, somniferous                                                                    | 3'-Phosphatase                                                            |
